# Supplementary material for: Oxaphosphiranes: isolable phosphorus-containing epoxide rings
Source: Royal Society of Chemistry journal article supplement (doi:10.1039/d4dt02915a), 2024-01-01
Supplement: d4dt02915a1.pdf [file d4dt02915a1.pdf]

## Supporting Information

### **Oxaphosphiranes: isolable phosphorus-containing epoxide rings**

Niklas Volk, Antonio García Alcaraz, Selvakumar Balasubramaniam, Jannik Heumann, Gregor Schnakenburg,  
Arturo Espinosa Ferao, Rainer Streubel

# Table of Contents

|          |                                                                                                                                                                                                                                    |           |
|----------|------------------------------------------------------------------------------------------------------------------------------------------------------------------------------------------------------------------------------------|-----------|
| <b>1</b> | <b>Experimental part</b> .....                                                                                                                                                                                                     | <b>3</b>  |
| 1.1      | General working techniques.....                                                                                                                                                                                                    | 3         |
| 1.2      | Analytical Data.....                                                                                                                                                                                                               | 3         |
| 1.2.1    | Synthesis of [Pentacarbonyl{2-triphenylmethyl-3-(3,5-difluorophenyl)oxaphosphirane- $\kappa$ P}molybdenum(0)] <b>3a</b> .....                                                                                                      | 3         |
| 1.2.2    | Synthesis of [Pentacarbonyl{2-triphenylmethyl-3-(3,5-bis(trifluoromethyl)phenyl)oxaphosphirane- $\kappa$ P}molybdenum(0)] <b>3b</b> .....                                                                                          | 6         |
| 1.2.3    | Synthesis of [Pentacarbonyl{2-triphenylmethyl-3-(3,5-difluorophenyl)oxaphosphirane- $\kappa$ P}tungsten(0)] <b>3c</b> .....                                                                                                        | 11        |
| 1.2.4    | Synthesis of 2-Triphenylmethyl-3-(3,5-difluorophenyl)oxaphosphirane <b>4a</b> .....                                                                                                                                                | 16        |
| 1.2.5    | 2-Triphenylmethyl-3-(3,5-bis(trifluoromethyl)phenyl)oxaphosphirane <b>4b</b> .....                                                                                                                                                 | 22        |
| 1.2.6    | Synthesis of 4,4',5,5',6,6',7,7'-Octachloro-2-triphenylmethyl-2,2'-spirobis[1,3,2-benzodioxaphosphole] <b>5</b> .....                                                                                                              | 28        |
| 1.2.7    | Product mixture of {2-hydroxy-1-(3,5-difluorophenyl)methyl}{1-triphenylmethyl}phosphaneoxide <b>8</b> (two diastereomers) and 1-triphenylmethylphosphaneoxide <b>9</b> in a ratio of 1.00 : 0.19 : 0.13.....                       | 32        |
| 1.2.8    | Product mixture of {1-deuterooxide-1-(3,5-difluorophenyl)methyl}{1-triphenylmethyl}phosphaneoxide <b>10</b> (two diastereomers) and 1,1-dideuterio-1-triphenylmethylphosphaneoxide <b>11</b> in a ratio of 0.26 : 1.00 : 0.27..... | 37        |
| 1.2.9    | Synthesis of chloro(triphenylmethyl)phosphane <b>16</b> .....                                                                                                                                                                      | 41        |
| 1.2.10   | Synthesis of compound <b>19</b> .....                                                                                                                                                                                              | 44        |
| 1.3      | Computational Details.....                                                                                                                                                                                                         | 48        |
| 1.4      | Calculated structures.....                                                                                                                                                                                                         | 49        |
| <b>2</b> | <b>References</b> .....                                                                                                                                                                                                            | <b>71</b> |

# 1 Experimental part

## 1.1 General working techniques

The syntheses of all compounds were performed under an argon atmosphere, using common Schlenk techniques and dry solvents. Toluene, tetrahydrofuran, diethyl ether and *n*-pentane were dried over sodium wire, CH<sub>2</sub>Cl<sub>2</sub> over CaH<sub>2</sub> and further purified by subsequent distillation. All NMR spectra were recorded on a Bruker AV I-300, Bruker AV I-400 or a Bruker AV III HD Prodigy 500 spectrometer. The <sup>1</sup>H and <sup>13</sup>C NMR spectra were referenced to the residual proton resonances and the <sup>13</sup>C NMR signals of the deuterated solvents and <sup>19</sup>F to CFCl<sub>3</sub> and <sup>31</sup>P to 85% H<sub>3</sub>PO<sub>4</sub> as external standards, respectively. Mass spectrometric data were collected either on a MAT 95 XL Finnigan spectrometer using EI, 70 eV or on a MAT 90 for LIFDI-measurements. Exact masses were determined by peak-matching with perfluorokerosine on MAT 95 XL Finnigan spectrometer. IR spectra were measured on a Thermo Nicolet 380 spectrometer with a SMART iTR unit (diamond). Elemental analyses were determined on a gas chromatograph of type *Vario EL* from *Elementa*. Single crystal measurements were recorded on a STOE IPDS-2T-spectrometer at 123K. An X-ray tube with Mo-K $\alpha$  - radiation ( $\lambda = 0,71073 \text{ \AA}$ ) was used as the radiation source.

## 1.2 Analytical Data

### 1.2.1 Synthesis of [Pentacarbonyl{2-triphenylmethyl-3-(3,5-difluorophenyl)oxaphosphirane- $\kappa$ P}molybdenum(0)] **3a**

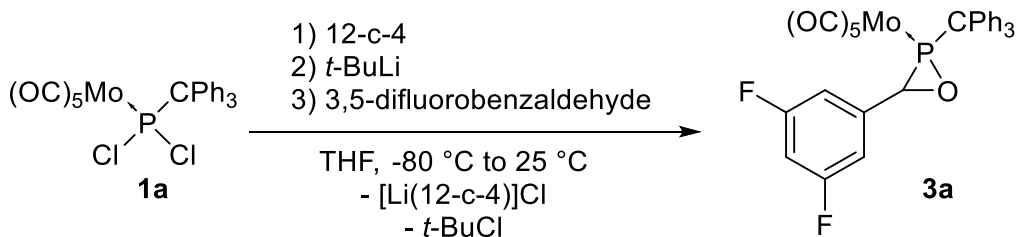

316.5 mg (0.54 mmol, 1.00 eq) **1a** were dissolved in 32 mL of THF. 85  $\mu$ l (0.54 mmol, 1.00 eq) 12-crown-4 were added and the solution was cooled to -80 °C. Then, 0.41 ml (0.70 mmol, 1.30 eq) *t*-BuLi (1.7 M in *n*-pentane) were added dropwise, and the solution turned intensely red. The solution was stirred for 30 min at -80 °C and subsequently 0.42 ml (2.14 mmol, 4.00 eq) 3,5-difluorobenzaldehyde were added, and the solution turned yellow. The solution was warmed up and the cooling bath was removed at -20 °C. The solvent was removed under reduced pressure ( $8 \times 10^{-3}$  mbar) and a yellow-brown residue was obtained. The residue was filtered over Al<sub>2</sub>O<sub>3</sub> (h = 3 cm,  $\varnothing = 2.5$  cm) with 36 mL of Et<sub>2</sub>O and a yellow filtrate was obtained. The solvent was removed under reduced pressure ( $8 \times 10^{-3}$  mbar) and the resulting slightly green solid was washed five times with a total of 8 mL of *n*-pentane at -30 °C. The remaining solid was dried under reduced pressure ( $8 \times 10^{-3}$  mbar) and the product was obtained as a colorless powder.

Yield: 168.7 mg (0.26 mmol, 48%).

Melting point: 142 °C

Elemental analysis: calculated: C 57.04 H 3.12 found.: C 57.07 H 2.94

MS (LIFDI):  $m/z$  (%) = 654.0 (100) [M]<sup>+</sup>, 243.1 (35) [CPh<sub>3</sub>]<sup>+</sup>, 92.1 (10) [CPh]<sup>+</sup>.

IR (ATR diamond): /  $\text{cm}^{-1}$  = 2076 (m,  $\nu(\text{CO})$ ), 1960 (s,  $\nu(\text{CO})$ ), 1950 (s,  $\nu(\text{CO})$ ), 1931 (s,  $\nu(\text{CO})$ ), 1618 (w,  $\nu(\text{C}=\text{C})$ ), 1596 (w,  $\nu(\text{C}=\text{C})$ ), 1580 (w,  $\nu(\text{C}=\text{C})$ ), 1132 (s,  $\nu(\text{C}-\text{F})$ ), 891 (m,  $\delta(\text{C}^{\text{Ar}}-\text{H})_{\text{oop}}$ ), 844 (w,  $\delta(\text{C}^{\text{Ar}}-\text{H})_{\text{oop}}$ ), 745 (m,  $\delta(\text{C}^{\text{Ar}}-\text{H})_{\text{oop}}$ ), 701 (s,  $\delta(\text{C}^{\text{Ar}}-\text{H})_{\text{oop}}$ ), 683 (m,  $\delta(\text{C}^{\text{Ar}}-\text{H})_{\text{oop}}$ ).

<sup>1</sup>H-NMR (300.13 MHz, 298.5 K, C<sub>6</sub>D<sub>6</sub>):  $\delta$  /ppm = 3.90 (d, 1H, <sup>2</sup>J<sub>P,H</sub> = 1.90 Hz, PC(H)O), 6.38 (tq, 1H, <sup>3</sup>J<sub>F,H</sub> = 8.9 Hz, <sup>4</sup>J<sub>H,H</sub> = 2.1 Hz, *p*-Aryl<sup>F</sup>), 6.68 (ddd, 2H, <sup>3</sup>J<sub>F,H</sub> = 7.4 Hz, <sup>4</sup>J<sub>H,H</sub> = 2.1 Hz, <sup>5</sup>J<sub>F,H</sub> = 1.1 Hz, *o*-Aryl<sup>F</sup>), 6.95 – 7.02 (m, 3H, *p*-CPh<sub>3</sub>), 7.04 – 7.12 (m, 6H, *o*-CPh<sub>3</sub>), 7.51 – 7.55 (m, 6H, *m*-CPh<sub>3</sub>).

<sup>13</sup>C{<sup>1</sup>H}-NMR (75.48 MHz, 298.0 K, C<sub>6</sub>D<sub>6</sub>):  $\delta$  /ppm = 58.3 (dt, <sup>1</sup>J<sub>P,C</sub> = 18.9 Hz, <sup>4</sup>J<sub>C,F</sub> = 2.8 Hz, PCO), 67.7 (d, <sup>1</sup>J<sub>P,C</sub> = 14.5 Hz, Ph<sub>3</sub>C-P), 104.1 (td, <sup>2</sup>J<sub>F,C</sub> = 25.4 Hz, <sup>5</sup>J<sub>P,C</sub> = 2.0 Hz, *p*-Aryl<sup>F</sup>), 110.0 (m, *o*-Aryl<sup>F</sup>), 128.2 (d, <sup>5</sup>J<sub>P,C</sub> = 1.7 Hz, *p*-CPh<sub>3</sub>), 129.1 (s, *o*-CPh<sub>3</sub>), 130.1 (d, <sup>4</sup>J<sub>P,C</sub> = 7.0 Hz, *m*-CPh<sub>3</sub>), 139.0 (td, <sup>3</sup>J<sub>F,C</sub> = 9.6 Hz, <sup>2</sup>J<sub>P,C</sub> = 2.0 Hz, *ipso*-Aryl<sup>F</sup>), 140.1 (d, <sup>2</sup>J<sub>P,C</sub> = 2.9 Hz, *ipso*-CPh<sub>3</sub>), 163.6 (ddd, <sup>1</sup>J<sub>F,C</sub> = 250.7 Hz, <sup>3</sup>J<sub>F,C</sub> = 12.6 Hz, <sup>4</sup>J<sub>P,C</sub> = 1.9 Hz, *m*-Aryl<sup>F</sup>), 165.3 (dd, <sup>1</sup>J<sub>F,C</sub> = 12.7 Hz, <sup>4</sup>J<sub>P,C</sub> = 1.8 Hz, *m*-Aryl<sup>F</sup>), 203.4 (d, <sup>2</sup>J<sub>P,C</sub> = 10.1 Hz, *cis*-CO), 207.2 (d, <sup>2</sup>J<sub>P,C</sub> = 41.6 Hz, *trans*-CO).

<sup>19</sup>F-NMR (282.4 MHz, 298.0 K, C<sub>6</sub>D<sub>6</sub>):  $\delta$  /ppm = -108.4 (dd, <sup>3</sup>J<sub>F,H</sub> = 7.7 Hz, <sup>3</sup>J<sub>F,H</sub> = 7.7 Hz, *m*-Aryl<sup>F</sup>).

<sup>31</sup>P{<sup>1</sup>H}-NMR (121.51 MHz, 298.0 K, C<sub>6</sub>D<sub>6</sub>):  $\delta$  /ppm = 34.7.

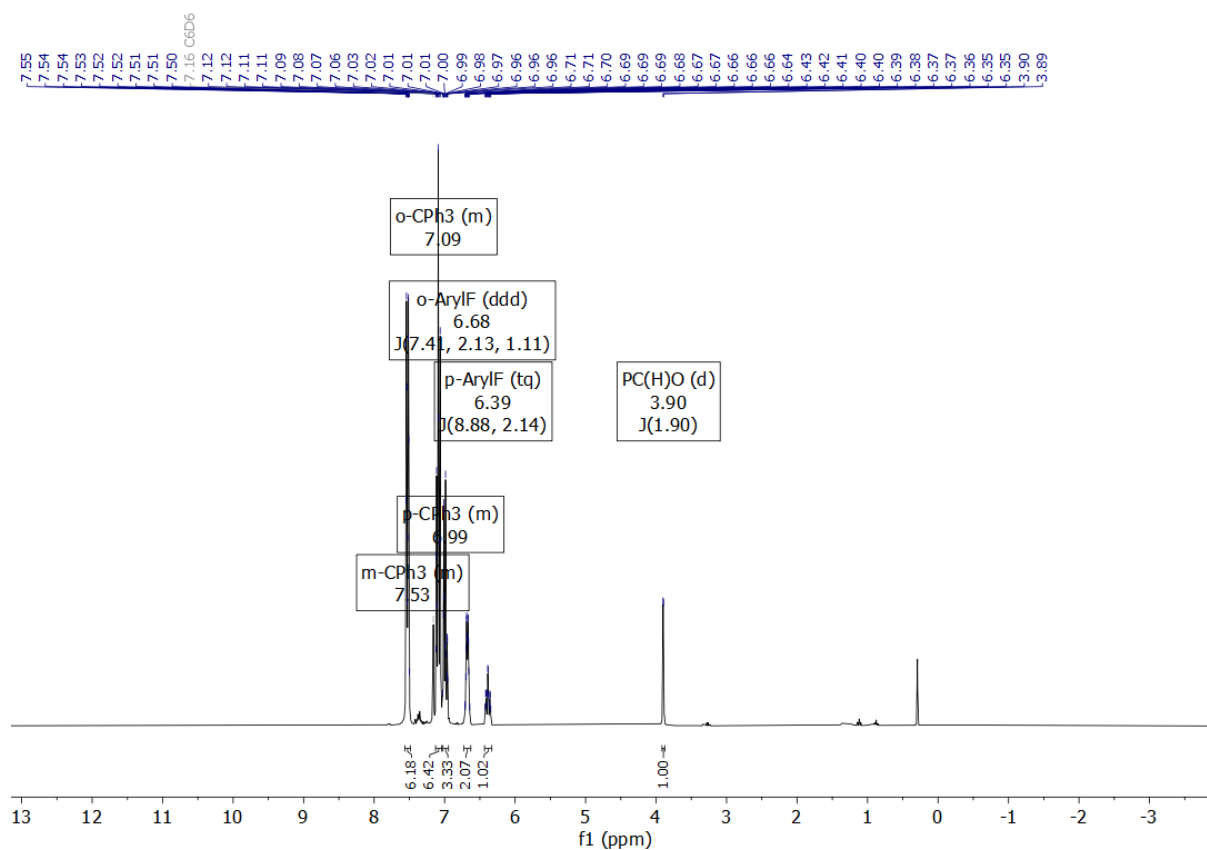

Figure S 1: <sup>1</sup>H-NMR spectrum in C<sub>6</sub>D<sub>6</sub>.

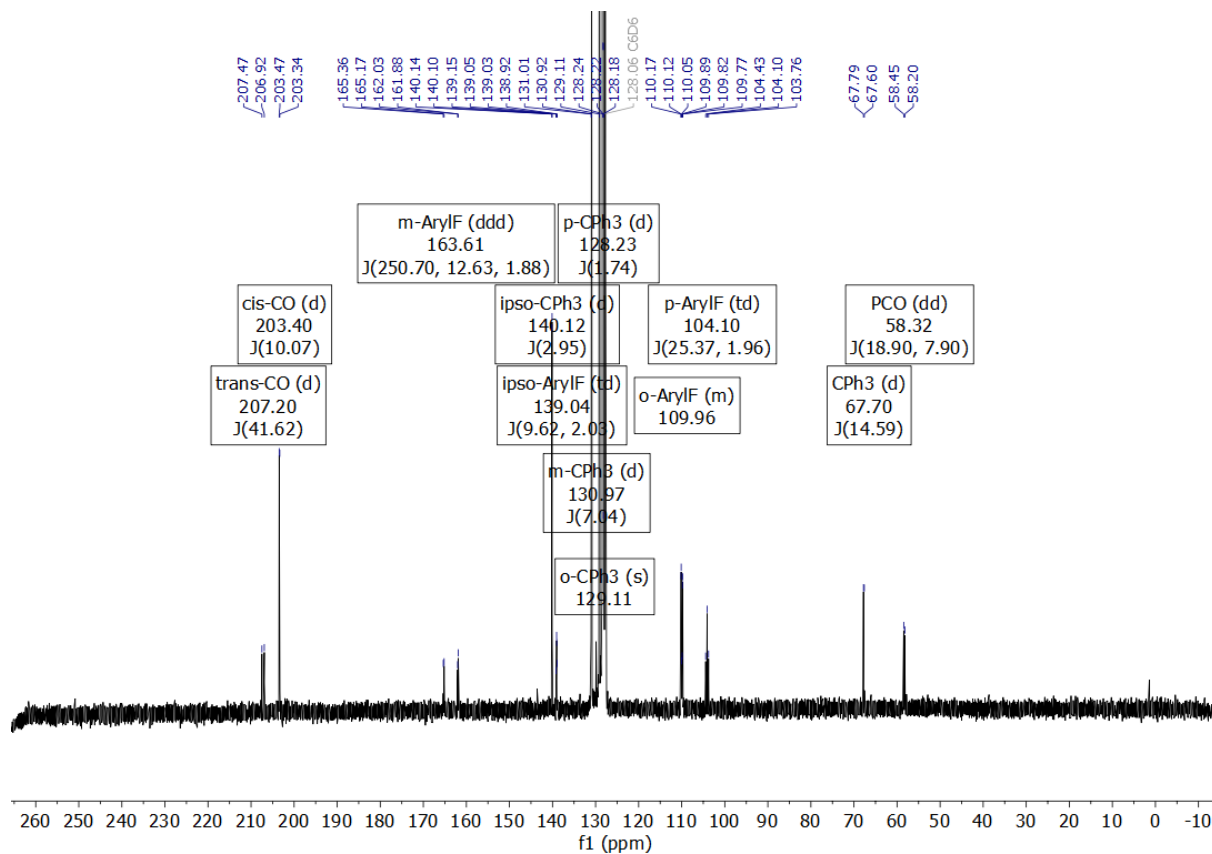

Figure S 2:  $^{13}\text{C}\{^1\text{H}\}$ -NMR spectrum in  $\text{C}_6\text{D}_6$ .

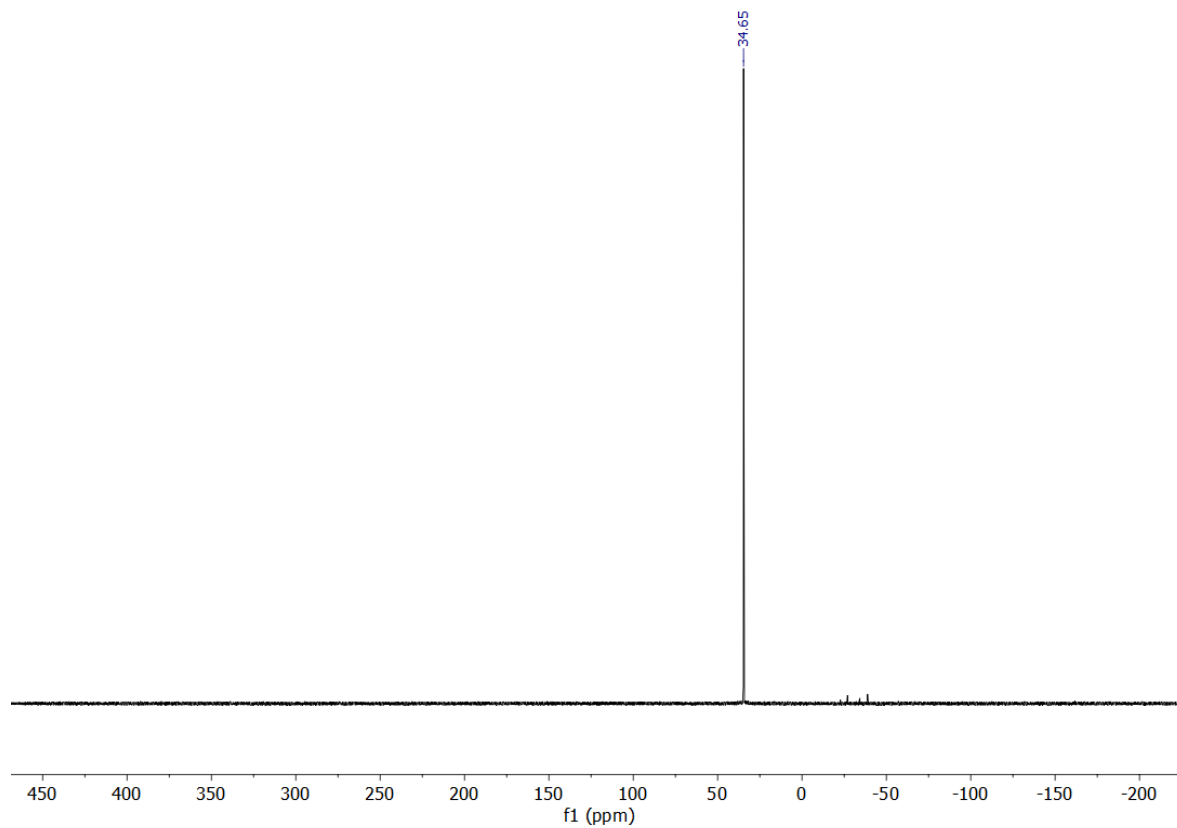

Figure S 3:  $^{31}\text{P}\{^1\text{H}\}$ -NMR spectrum in  $\text{C}_6\text{D}_6$ .

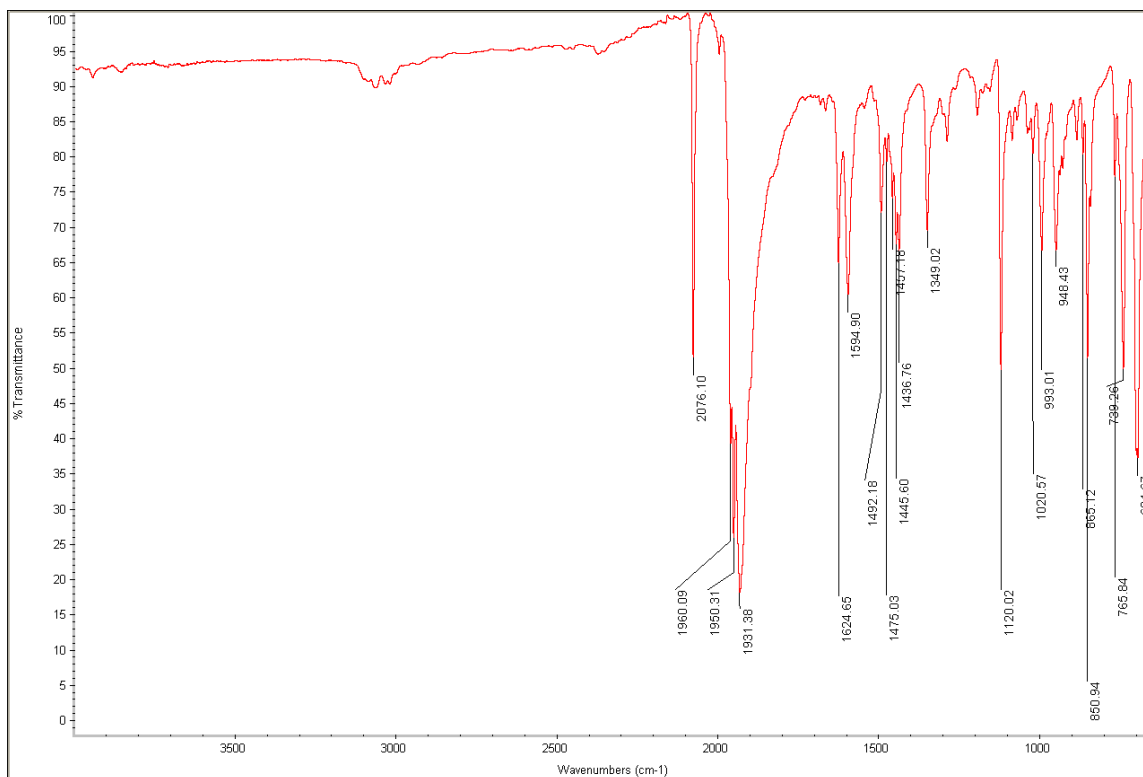

**Figure S 4:** IR spectrum of **3a**.

### 1.2.2 Synthesis of [Pentacarbonyl{2-triphenylmethyl-3-(3,5-bis(trifluoromethyl)phenyl)-oxaphosphirane- $\kappa$ P}molybdenum (0)] **3b**

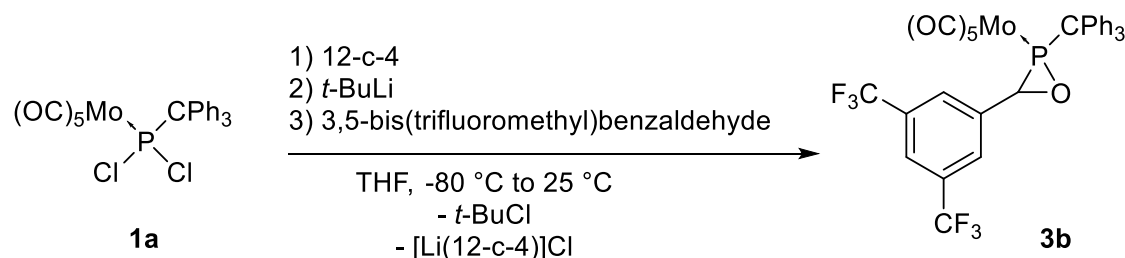

294.8 mg (0.51 mmol, 1.00 eq) **1a** were dissolved in 30 mL of THF. 81  $\mu$ l (0.51 mmol, 1.00 eq) 12-crown-4 were added and the solution was cooled to  $-80$   $^{\circ}$ C. Then, 0.39 ml (0.66 mmol, 1.30 eq) *t*-BuLi (1.7 M in *n*-pentane) were added dropwise, and the solution turned intensely red. The solution was stirred for 30 min at  $-80$   $^{\circ}$ C and subsequently 0.33 ml (2.03 mmol, 4.00 eq) 3,5-bis(trifluoromethyl)benzaldehyde were added, and the solution turned yellow. The solution was warmed up and the cooling bath was removed at  $-20$   $^{\circ}$ C. The solvent was removed under reduced pressure ( $8 \times 10^{-3}$  mbar) and a yellow-brown residue was obtained. The residue was filtered over  $\text{Al}_2\text{O}_3$  ( $h = 3$  cm,  $\varnothing = 2.5$  cm) with 36 mL of  $\text{Et}_2\text{O}$  and a yellow filtrate was obtained. The solvent was removed under reduced pressure ( $8 \times 10^{-3}$  mbar) and the resulting slightly green solid was washed four times with a total of 6 mL of *n*-pentane at  $-30$   $^{\circ}$ C. The remaining solid was dried under reduced pressure ( $8 \times 10^{-3}$  mbar) and the product was obtained as a colorless powder.

Yield: 220 mg (0.28 mmol, 58%).

Melting point: 140 °C

Elemental analysis: calculated.: C 52.68 H 2.55 found: C 53.22 H 2.70

MS (LIFDI):  $m/z$  (%) = 754.1 (100)  $[M]^+$ , 243.1 (35)  $[CPh_3]^+$ , 92.0 (17)  $[CPh]^+$ .

IR (ATR diamond):  $\text{cm}^{-1}$  = 2080 (m,  $\nu(\text{CO})$ ), 1958 (s,  $\nu(\text{CO})$ ), 1944 (s,  $\nu(\text{CO})$ ), 1133 (s,  $\nu(\text{C-F})$ ), 891 (m,  $\delta(\text{C}^{\text{ArCF}_3}\text{-H})_{\text{oop}}$ ), 844 (w,  $\delta(\text{C}^{\text{ArCF}_3}\text{-H})_{\text{oop}}$ ), 747 (m,  $\delta(\text{C}^{\text{Ar}}\text{-H})_{\text{oop}}$ ), 702 (s,  $\delta(\text{C}^{\text{Ar}}\text{-H})_{\text{oop}}$ ), 683 (m,  $\delta(\text{C}^{\text{Ar}}\text{-H})_{\text{oop}}$ ).

Single crystal x-ray analysis: GSTR716

$^1\text{H-NMR}$  (300.13 MHz, 298.5 K,  $\text{C}_6\text{D}_6$ ):  $\delta$  /ppm = 3.95 (s, 1H,  $\text{PC}(\text{H})\text{O}$ ), 6.92 - 7.05 (m, 3H,  $p\text{-CPh}_3$ ), 7.05 - 7.15 (m, 6H,  $m\text{-CPh}_3$ ), 7.49 - 7.58 (m, 6H,  $o\text{-CPh}_3$ ), 7.61 (s, 2H,  $o\text{-Aryl}^{\text{CF}_3}$ ), 7.69 (s, 1H,  $p\text{-Aryl}^{\text{CF}_3}$ ).

$^{13}\text{C}\{^1\text{H}\}\text{-NMR}$  (75.48 MHz, 298.0 K,  $\text{C}_6\text{D}_6$ ):  $\delta$  /ppm = 58.1 (d,  $^1J_{\text{P,C}} = 19.5$  Hz,  $\text{PCO}$ ), 68.0 (d,  $^1J_{\text{P,C}} = 14.3$  Hz,  $\text{Ph}_3\text{C-P}$ ), 122.2 - 122.4 (m,  $p\text{-Aryl}^{\text{CF}_3}$ ), 123.6 (q,  $^1J_{\text{F,C}} = 273.0$  Hz,  $\text{CF}_3$ ), 127.3 (s,  $o\text{-Aryl}^{\text{CF}_3}$ ), 128.4 (s,  $p\text{-CPh}_3$ ), 129.2 (s,  $m\text{-CPh}_3$ ), 131.0 (d,  $^3J_{\text{P,C}} = 7.0$  Hz,  $o\text{-CPh}_3$ ), 132.3 (qd,  $^2J_{\text{F,C}} = 33.5$  Hz,  $^4J_{\text{P,C}} = 1.2$  Hz,  $m\text{-Aryl}^{\text{CF}_3}$ ), 138.2 (d,  $^2J_{\text{P,C}} = 2.0$  Hz,  $ipso\text{-Aryl}^{\text{CF}_3}$ ), 140.0 (d,  $^2J_{\text{P,C}} = 2.8$  Hz,  $ipso\text{-CPh}_3$ ), 203.2 (d,  $^2J_{\text{P,C}} = 10.0$  Hz,  $cis\text{-CO}$ ), 206.7 (d,  $^2J_{\text{P,C}} = 41.5$  Hz,  $trans\text{-CO}$ ).

$^{19}\text{F}\{^1\text{H}\}\text{-NMR}$ :  $\delta$  /ppm = -63.0 ppm.

$^{31}\text{P}\{^1\text{H}\}\text{-NMR}$  (121.51 MHz, 298.0 K,  $\text{C}_6\text{D}_6$ ):  $\delta$  /ppm = 35.0.

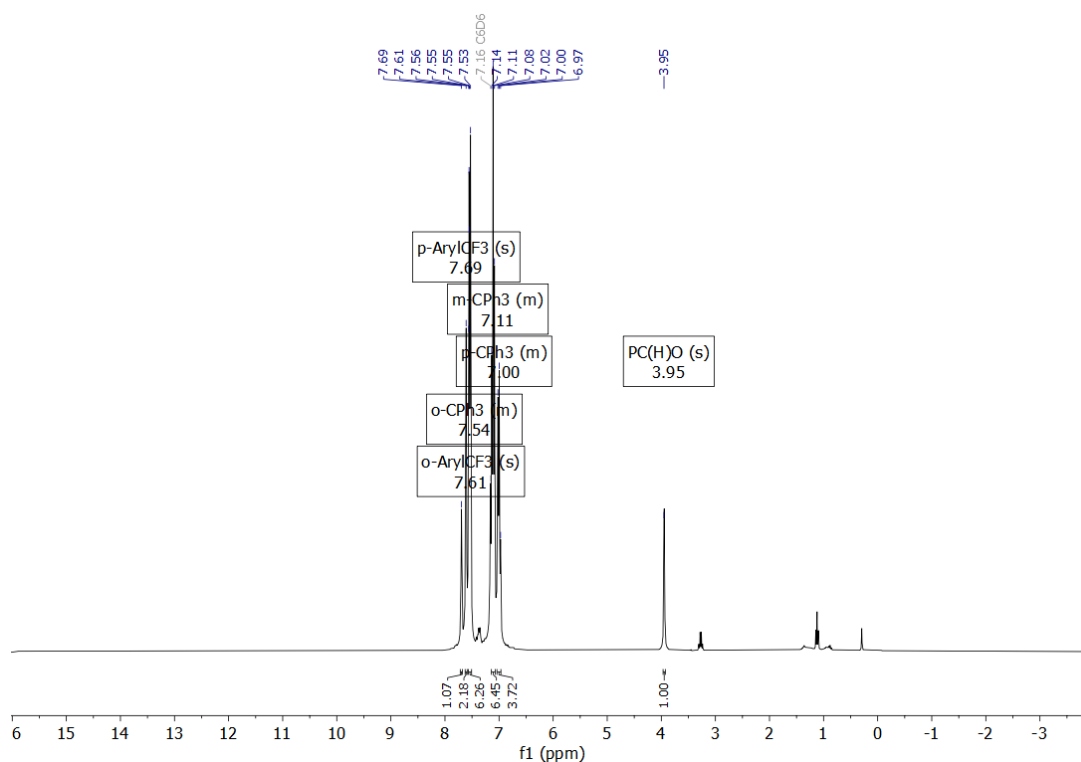

Figure S 5:  $^1\text{H-NMR}$  spectrum in  $\text{C}_6\text{D}_6$ .

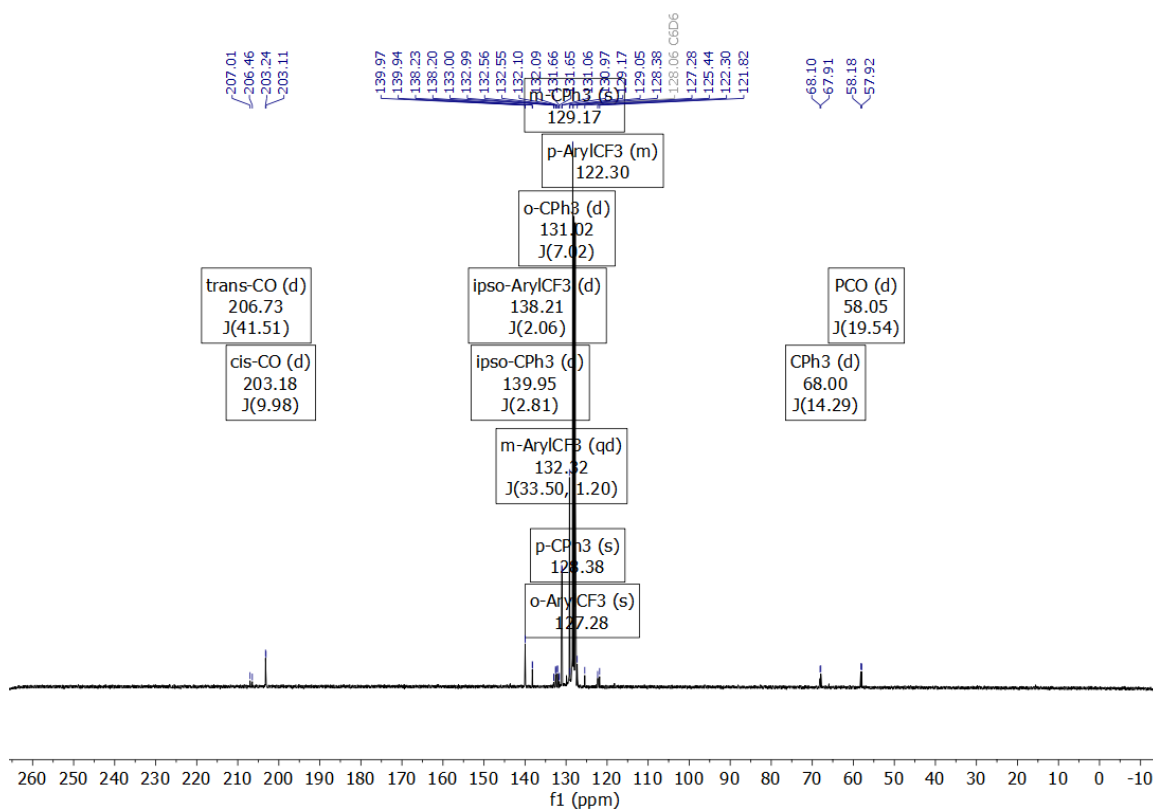

Figure S 6:  $^{13}\text{C}\{^1\text{H}\}$ -NMR spectrum in  $\text{C}_6\text{D}_6$ .

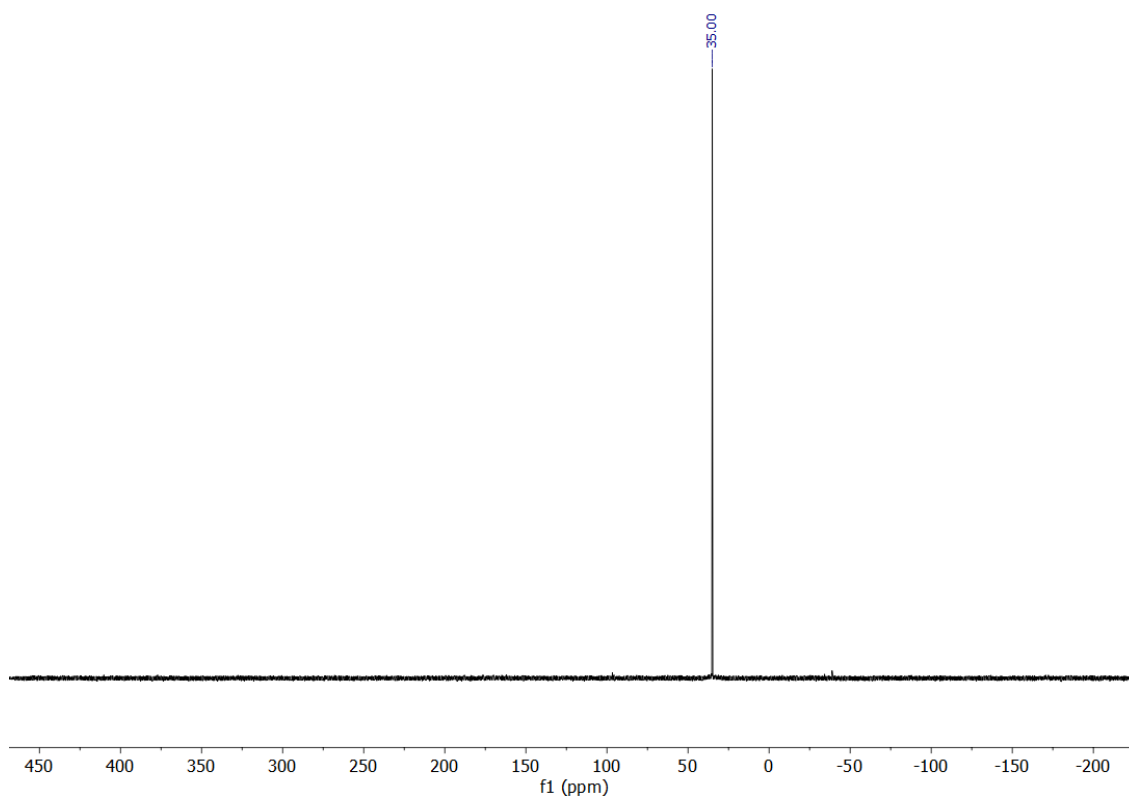

Figure S 7:  $^{31}\text{P}\{^1\text{H}\}$ -NMR spectrum in  $\text{C}_6\text{D}_6$ .



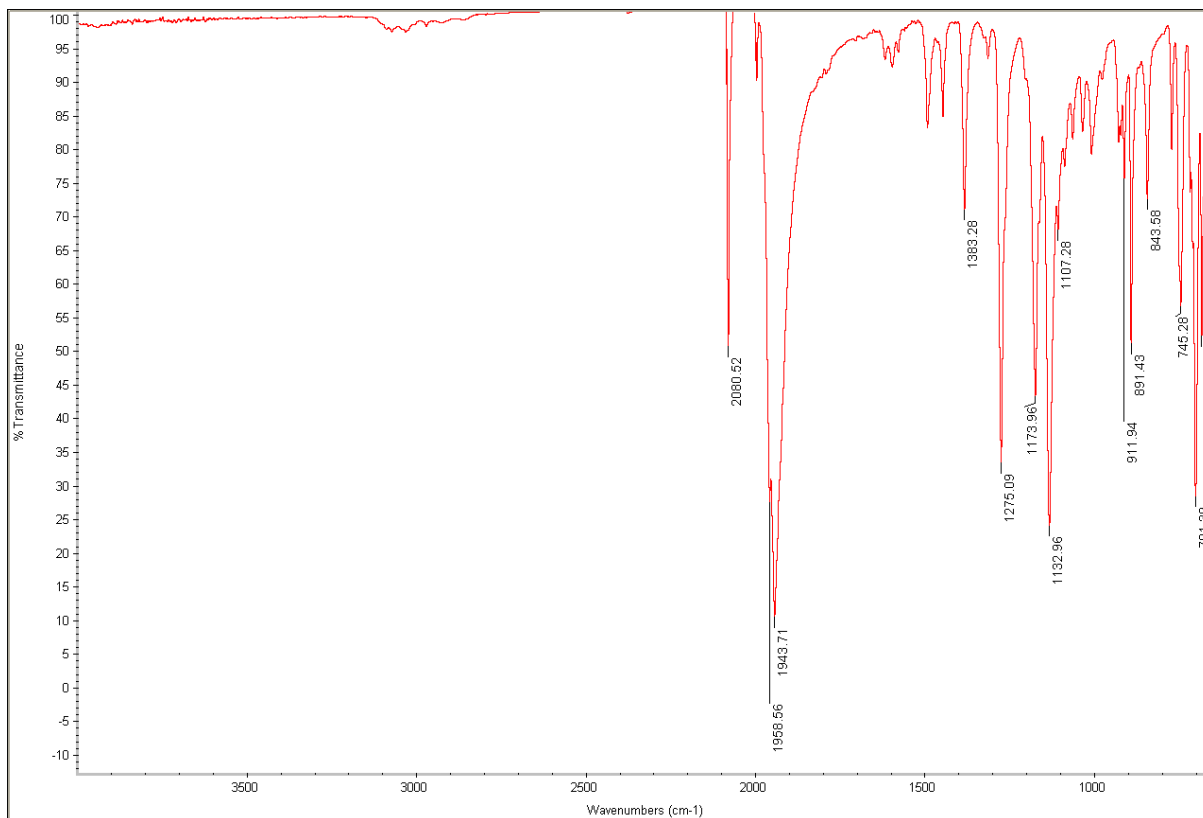

**Figure S 8:** IR spectrum of **3b**.

### Molecular structure of **3b**

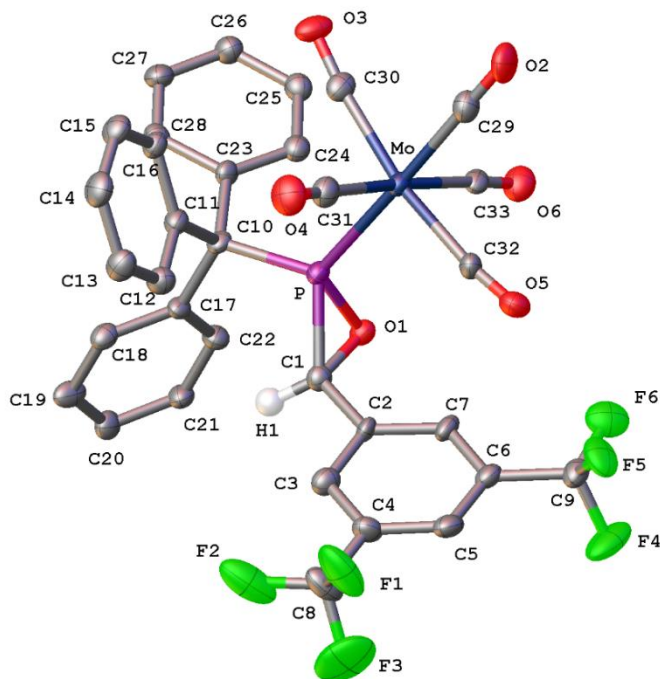

**Figure S 9:** Molecular structure of **3b** of the (2*R*,3*R*)-enantiomer in the single crystal (50% probability level). The hydrogen atoms, except the hydrogen atom of the oxaphosphirane ring, are omitted for clarity.

## Bond lengths in Å

|    |     |            |     |     |          |
|----|-----|------------|-----|-----|----------|
| Mo | P   | 2.4872(14) | C4  | C8  | 1.495(8) |
| Mo | C29 | 2.022(6)   | C5  | C6  | 1.390(8) |
| Mo | C30 | 2.059(6)   | C6  | C7  | 1.393(7) |
| Mo | C31 | 2.061(6)   | C6  | C9  | 1.496(8) |
| Mo | C32 | 2.044(5)   | C10 | C11 | 1.536(7) |
| Mo | C33 | 2.067(5)   | C10 | C17 | 1.547(7) |
| P  | O1  | 1.673(4)   | C10 | C23 | 1.540(7) |
| P  | C1  | 1.802(5)   | C11 | C12 | 1.382(8) |
| P  | C10 | 1.911(5)   | C11 | C16 | 1.403(7) |
| F1 | C8  | 1.342(8)   | C12 | C13 | 1.410(8) |
| F2 | C8  | 1.312(7)   | C13 | C14 | 1.383(8) |
| F3 | C8  | 1.336(8)   | C14 | C15 | 1.379(9) |
| F4 | C9  | 1.331(6)   | C15 | C16 | 1.382(7) |
| F5 | C9  | 1.348(7)   | C17 | C18 | 1.403(7) |
| F6 | C9  | 1.324(7)   | C17 | C22 | 1.392(7) |
| O1 | C1  | 1.458(6)   | C18 | C19 | 1.393(7) |
| O2 | C29 | 1.148(7)   | C19 | C20 | 1.387(8) |
| O3 | C30 | 1.138(6)   | C20 | C21 | 1.390(8) |
| O4 | C31 | 1.134(7)   | C21 | C22 | 1.398(8) |
| O5 | C32 | 1.136(6)   | C23 | C24 | 1.382(7) |
| O6 | C33 | 1.126(6)   | C23 | C28 | 1.416(7) |
| C1 | C2  | 1.483(7)   | C24 | C25 | 1.396(8) |
| C2 | C3  | 1.399(8)   | C25 | C26 | 1.396(8) |
| C2 | C7  | 1.383(7)   | C26 | C27 | 1.374(8) |
| C3 | C4  | 1.398(7)   | C27 | C28 | 1.378(7) |
| C4 | C5  | 1.384(8)   |     |     |          |

## Bond angles in °

|     |    |     |            |     |     |     |          |
|-----|----|-----|------------|-----|-----|-----|----------|
| C29 | Mo | P   | 176.03(17) | F3  | C8  | C4  | 112.2(6) |
| C29 | Mo | C30 | 85.0(2)    | F4  | C9  | F5  | 105.6(5) |
| C29 | Mo | C31 | 89.5(2)    | F4  | C9  | C6  | 112.0(5) |
| C29 | Mo | C32 | 84.5(2)    | F5  | C9  | C6  | 111.7(5) |
| C29 | Mo | C33 | 91.0(2)    | F6  | C9  | F4  | 107.4(5) |
| C30 | Mo | P   | 92.05(16)  | F6  | C9  | F5  | 106.3(5) |
| C30 | Mo | C31 | 91.0(2)    | F6  | C9  | C6  | 113.4(5) |
| C30 | Mo | C33 | 92.1(2)    | C11 | C10 | P   | 99.4(3)  |
| C31 | Mo | P   | 93.27(17)  | C11 | C10 | C17 | 113.5(4) |
| C31 | Mo | C33 | 176.8(2)   | C11 | C10 | C23 | 114.1(4) |
| C32 | Mo | P   | 98.37(15)  | C17 | C10 | P   | 112.8(3) |
| C32 | Mo | C30 | 169.5(2)   | C23 | C10 | P   | 112.0(3) |
| C32 | Mo | C31 | 89.4(2)    | C23 | C10 | C17 | 105.3(4) |
| C32 | Mo | C33 | 87.5(2)    | C12 | C11 | C10 | 118.8(5) |
| C33 | Mo | P   | 86.40(15)  | C12 | C11 | C16 | 118.4(5) |
| O1  | P  | Mo  | 118.83(14) | C16 | C11 | C10 | 122.7(5) |
| O1  | P  | C1  | 49.5(2)    | C11 | C12 | C13 | 121.0(5) |
| O1  | P  | C10 | 108.9(2)   | C14 | C13 | C12 | 119.4(5) |
| C1  | P  | Mo  | 129.45(18) | C15 | C14 | C13 | 119.8(5) |
| C1  | P  | C10 | 105.3(2)   | C14 | C15 | C16 | 120.9(5) |

|     |    |    |            |     |     |     |          |
|-----|----|----|------------|-----|-----|-----|----------|
| C10 | P  | Mo | 122.48(15) | C15 | C16 | C11 | 120.4(5) |
| C1  | O1 | P  | 69.9(2)    | C18 | C17 | C10 | 122.3(4) |
| O1  | C1 | P  | 60.7(2)    | C22 | C17 | C10 | 119.5(5) |
| O1  | C1 | C2 | 116.5(4)   | C22 | C17 | C18 | 118.1(5) |
| C2  | C1 | P  | 124.5(4)   | C19 | C18 | C17 | 120.2(5) |
| C3  | C2 | C1 | 117.8(5)   | C20 | C19 | C18 | 121.3(5) |
| C7  | C2 | C1 | 122.9(5)   | C19 | C20 | C21 | 118.7(5) |
| C7  | C2 | C3 | 119.3(5)   | C20 | C21 | C22 | 120.2(5) |
| C4  | C3 | C2 | 120.0(5)   | C17 | C22 | C21 | 121.3(5) |
| C3  | C4 | C8 | 120.1(5)   | C24 | C23 | C10 | 124.5(4) |
| C5  | C4 | C3 | 120.2(5)   | C24 | C23 | C28 | 118.0(5) |
| C5  | C4 | C8 | 119.7(5)   | C28 | C23 | C10 | 117.3(4) |
| C4  | C5 | C6 | 119.8(5)   | C23 | C24 | C25 | 120.9(5) |
| C5  | C6 | C7 | 120.1(5)   | C26 | C25 | C24 | 120.2(5) |
| C5  | C6 | C9 | 118.7(5)   | C27 | C26 | C25 | 119.1(5) |
| C7  | C6 | C9 | 121.2(5)   | C26 | C27 | C28 | 121.1(5) |
| C2  | C7 | C6 | 120.6(5)   | C27 | C28 | C23 | 120.6(5) |
| F1  | C8 | C4 | 111.5(5)   | O2  | C29 | Mo  | 179.5(5) |
| F2  | C8 | F1 | 106.7(6)   | O3  | C30 | Mo  | 173.1(5) |
| F2  | C8 | F3 | 106.7(6)   | O4  | C31 | Mo  | 175.7(6) |
| F2  | C8 | C4 | 114.7(5)   | O5  | C32 | Mo  | 171.9(5) |
| F3  | C8 | F1 | 104.4(5)   | O6  | C33 | Mo  | 176.8(5) |

### 1.2.3 Synthesis of [Pentacarbonyl{2-triphenylmethyl-3-(3,5-difluorophenyl)oxaphosphirane- $\kappa$ P}tungsten(0)] **3c**

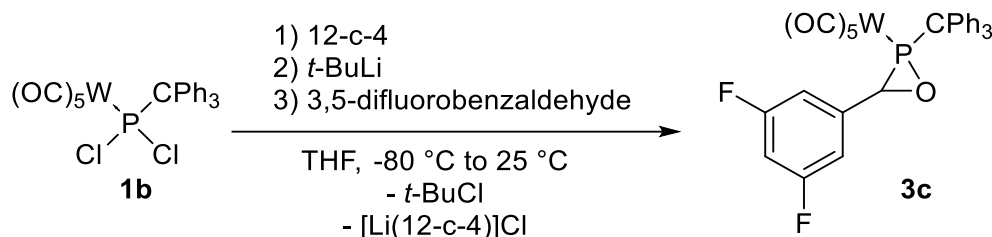

345.0 mg (0.52 mmol, 1.00 eq) **1b** were dissolved in 23 mL of THF. 74  $\mu$ l (0.47 mmol, 0.90 eq) 12-crown-4 were added and the solution was cooled to  $-80\text{ }^\circ\text{C}$ . Then, 0.36 ml (0.61 mmol, 1.18 eq) *t*-BuLi (1.7 M in *n*-pentane) were added dropwise, and the solution turned intensely red. The solution was stirred for 30 min at  $-80\text{ }^\circ\text{C}$  and subsequently 0.17 ml (1.86 mmol, 3.62 eq) 3,5-difluorobenzaldehyde were added, and the solution turned yellow. The solution was warmed up and the cooling bath was removed at  $-20\text{ }^\circ\text{C}$ . The solvent was removed under reduced pressure ( $8 \times 10^{-3}$  mbar) and a yellow-brown residue was obtained. The residue was filtered over  $Al_2O_3$  ( $h = 3$  cm,  $\varnothing = 2.5$  cm) with 40 mL of  $Et_2O$  and a yellow filtrate was obtained. The solvent was removed under reduced pressure ( $8 \times 10^{-3}$  mbar) and the resulting slightly yellow solid was washed five times with a total of 2 mL of *n*-pentane at  $-30\text{ }^\circ\text{C}$ . The remaining solid was dried under reduced pressure ( $8 \times 10^{-3}$  mbar) and the product was obtained as a colorless powder.

Yield: 248.1 mg (0.34 mmol, 65%).

Melting point: 130 °C

Elemental analysis: calculated.: C 50.30 H 2.59 found: C 50.54 H 2.96

MS (LIFDI):  $m/z$  (%) = 740.1 (100) [M]<sup>+</sup>, 597.9 (2) [M-5 CO]<sup>+</sup>, 243.1 (100) [CPh<sub>3</sub>]<sup>+</sup>.

IR (ATR diamond): / cm<sup>-1</sup> = 2075 (m,  $\nu$ (CO)), 1953 (s,  $\nu$ (CO)), 1942 (s,  $\nu$ (CO)), 1928 (s,  $\nu$ (CO)), 1625 (w,  $\nu$ (C=C)), 1595 (w,  $\nu$ (C=C)), 1120 (m,  $\nu$ (C-F)), 851 (m,  $\delta$ (C<sup>ArF</sup>-H)<sub>oop</sub>), 741 (m,  $\delta$ (C<sup>Ar</sup>-H)<sub>oop</sub>), 700 (m,  $\delta$ (C<sup>Ar</sup>-H)<sub>oop</sub>).

<sup>1</sup>H-NMR (500.04 MHz, 298.0 K, CDCl<sub>3</sub>):  $\delta$  /ppm = 3.93 (br s, 1H, PC(H)O), 6.73 (tq, 1H, <sup>3</sup>J<sub>F,H</sub> = 8.9 Hz, <sup>4</sup>J<sub>H,H</sub> = 2.0 Hz, *p*-Aryl<sup>F</sup>), 6.84 – 6.90 (m, 2H, *o*-Aryl<sup>F</sup>), 7.31 – 7.36 (m, 3H, *p*-CPh<sub>3</sub>), 7.38 – 7.44 (m, 6H, *o*-CPh<sub>3</sub>), 7.51 – 7.56 (m, 6H, *m*-CPh<sub>3</sub>).

<sup>13</sup>C{<sup>1</sup>H}-NMR (125.75 MHz, 298.0 K, CDCl<sub>3</sub>):  $\delta$  /ppm = 59.0 (d, <sup>1</sup>J<sub>P,C</sub> = 23.3 Hz, PCO), 67.6 (d, <sup>1</sup>J<sub>P,C</sub> = 7.4 Hz, Ph<sub>3</sub>C-P), 104.0 (t, <sup>2</sup>J<sub>F,C</sub> = 25.5 Hz, *p*-Aryl<sup>F</sup>), 109.7 (m, *o*-Aryl<sup>F</sup>), 128.0 (d, <sup>5</sup>J<sub>P,C</sub> = 1.6 Hz, *p*-CPh<sub>3</sub>), 128.9 (s, *o*-CPh<sub>3</sub>), 130.7 (d, <sup>4</sup>J<sub>P,C</sub> = 6.9 Hz, *m*-CPh<sub>3</sub>), 138.5 (t, <sup>3</sup>J<sub>F,C</sub> = 9.4 Hz, *ipso*-Aryl<sup>F</sup>), 139.5 (d, <sup>2</sup>J<sub>P,C</sub> = 2.1 Hz, *ipso*-CPh<sub>3</sub>), 163.5 (dd, <sup>1</sup>J<sub>F,C</sub> = 250.2 Hz, <sup>3</sup>J<sub>F,C</sub> = 12.7 Hz, *m*-Aryl<sup>F</sup>, <sup>4</sup>J<sub>P,C</sub> = 1.9 Hz), 193.8 (d, <sup>1</sup>J<sub>W,C</sub> = 8.5 Hz, <sup>2</sup>J<sub>P,C</sub> = 8.0 Hz, *cis*-CO), 193.4 (d, <sup>2</sup>J<sub>P,C</sub> = 41.6 Hz, *trans*-CO).

<sup>19</sup>F{<sup>1</sup>H}-NMR:  $\delta$  /ppm = -108.3.

<sup>31</sup>P{<sup>1</sup>H}-NMR (202.44 MHz, 298.0 K, CDCl<sub>3</sub>):  $\delta$  /ppm = 16.9 (s<sub>sat</sub>, <sup>1</sup>J<sub>P,W</sub> = 315.7 Hz).

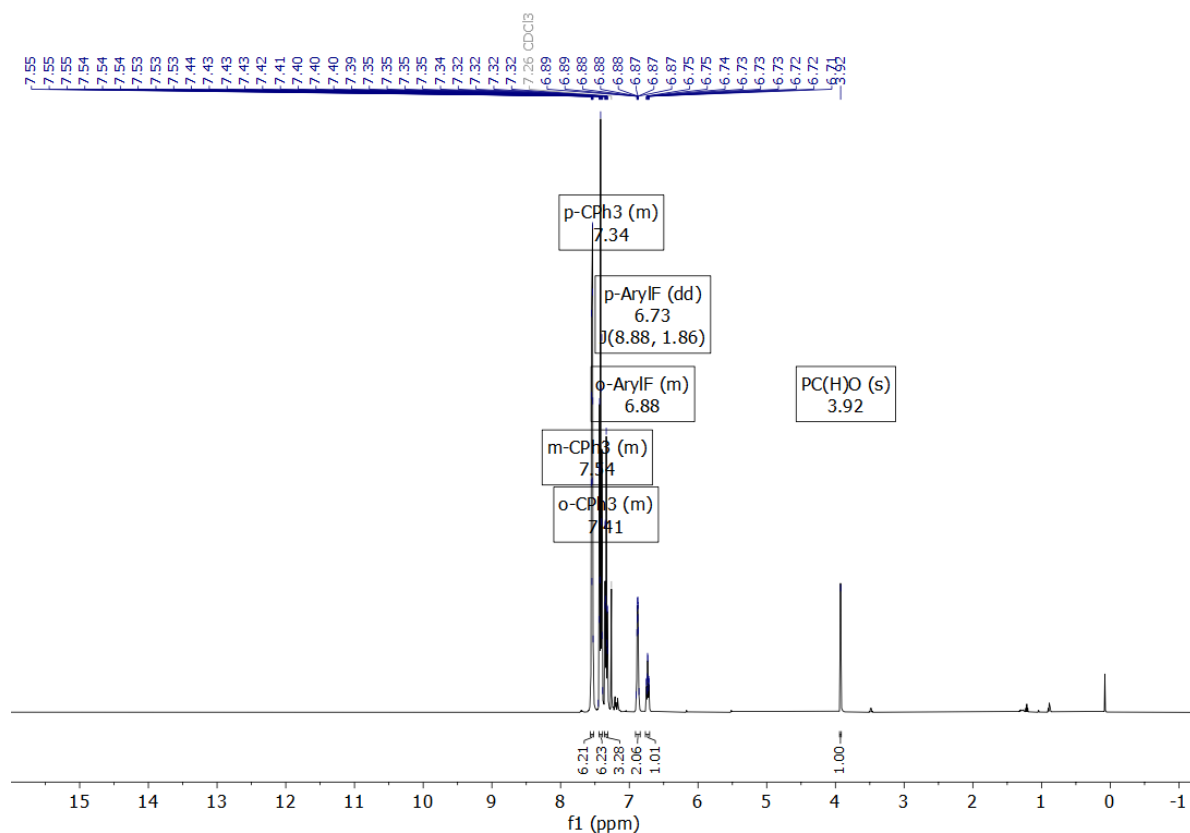

Figure S 10: <sup>1</sup>H-NMR spectrum in CDCl<sub>3</sub>.

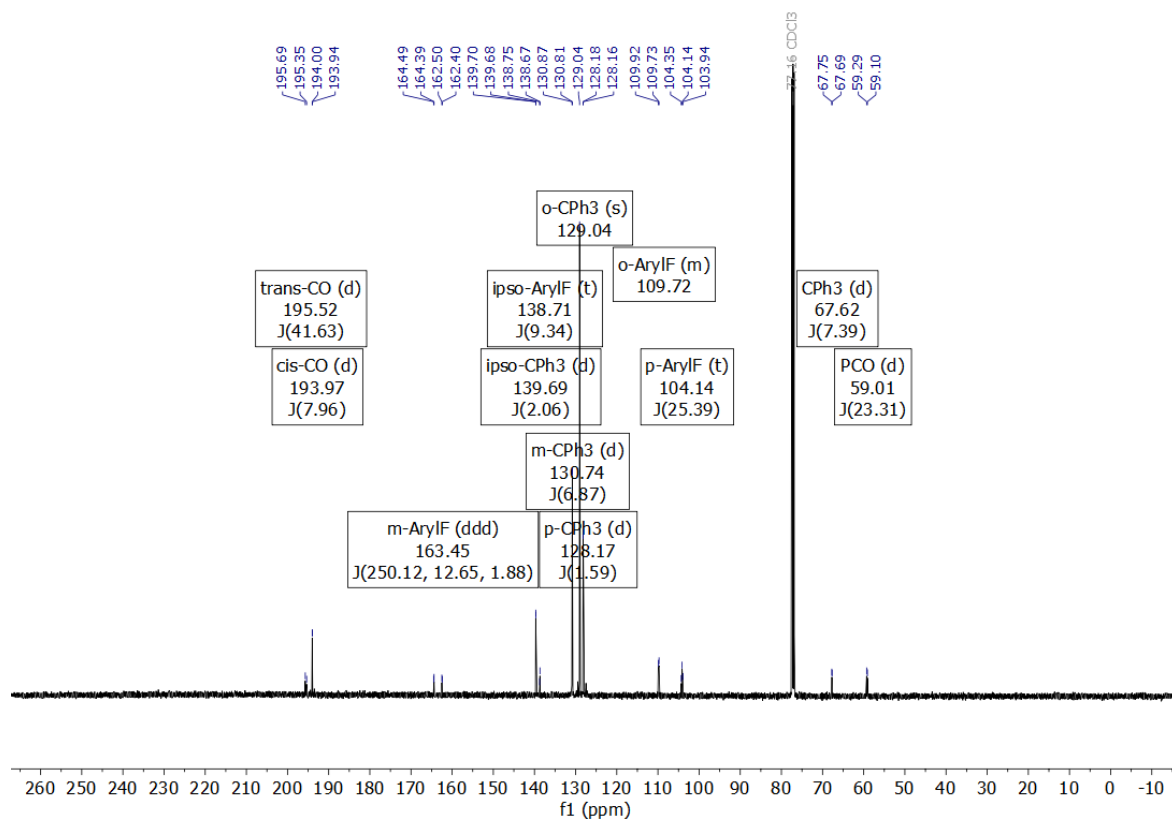

**Figure S 11:** <sup>13</sup>C{<sup>1</sup>H}-NMR spectrum in CDCl<sub>3</sub>.

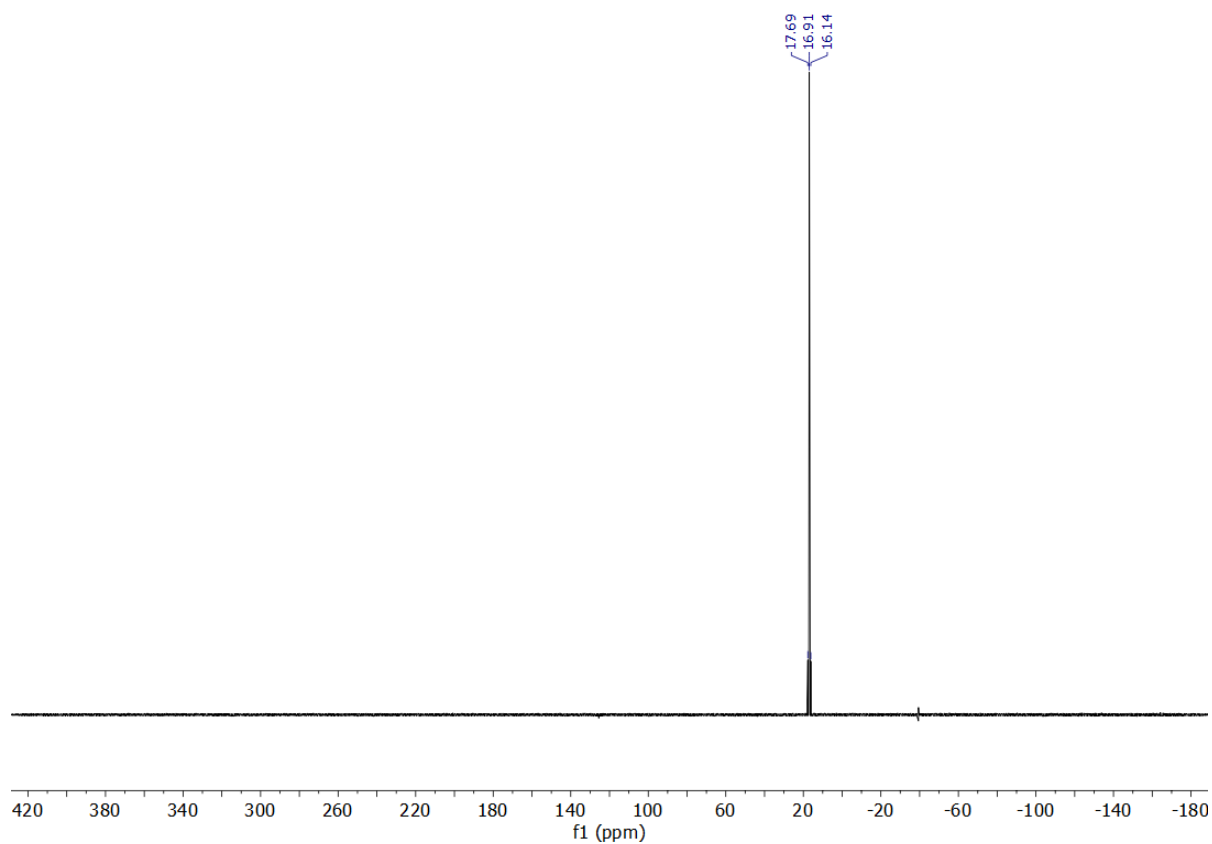

**Figure S 12:** <sup>31</sup>P{<sup>1</sup>H}-NMR spectrum in CDCl<sub>3</sub>.

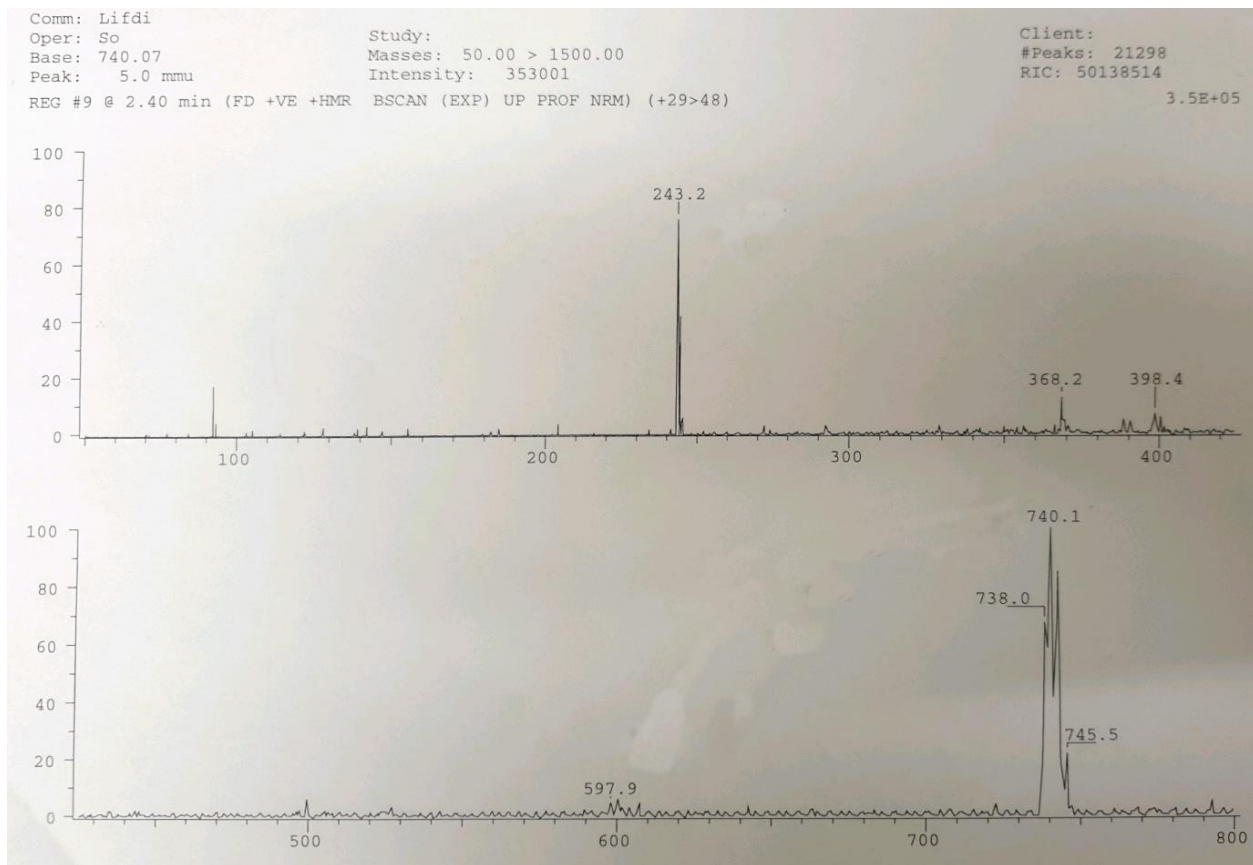

**Figure S 13:** MS spectrum (LIFDI) of **3c**.

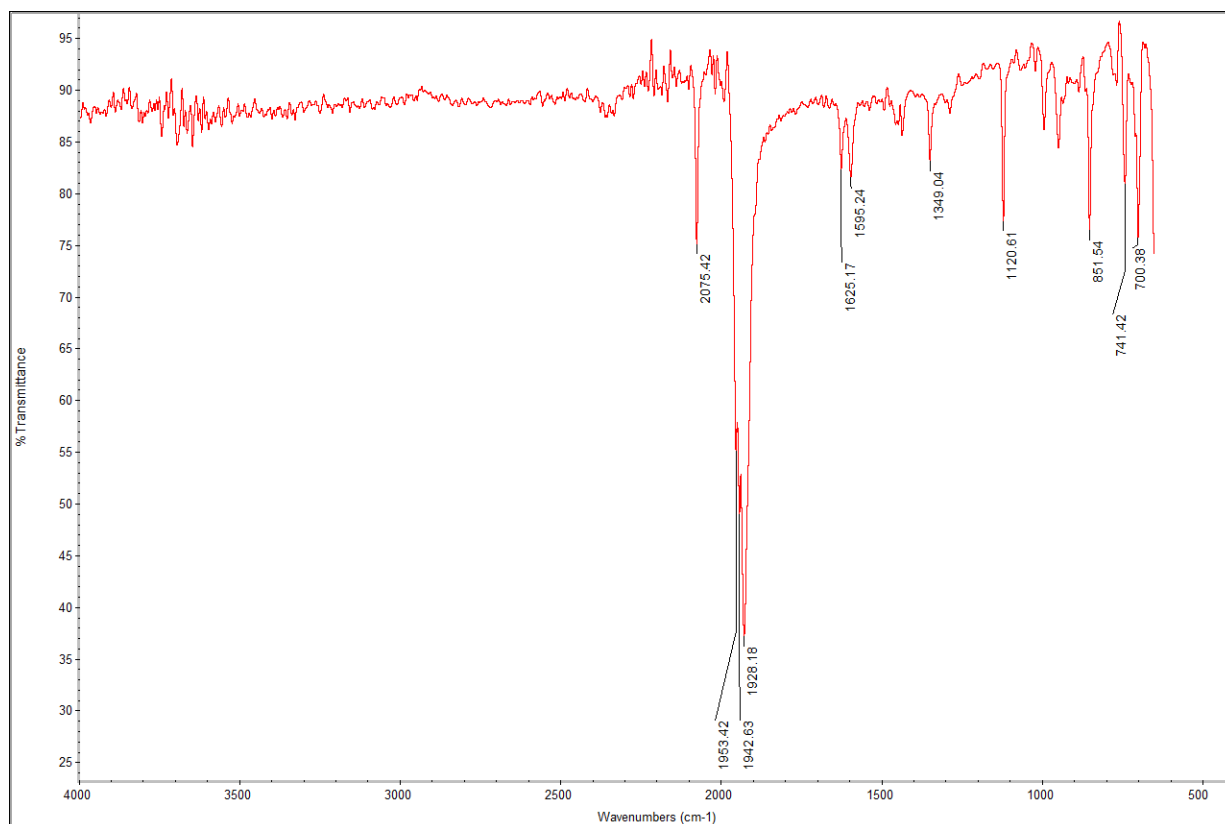

**Figure S 14:** IR spectrum of **3c**.

### Molecular structure of 3c

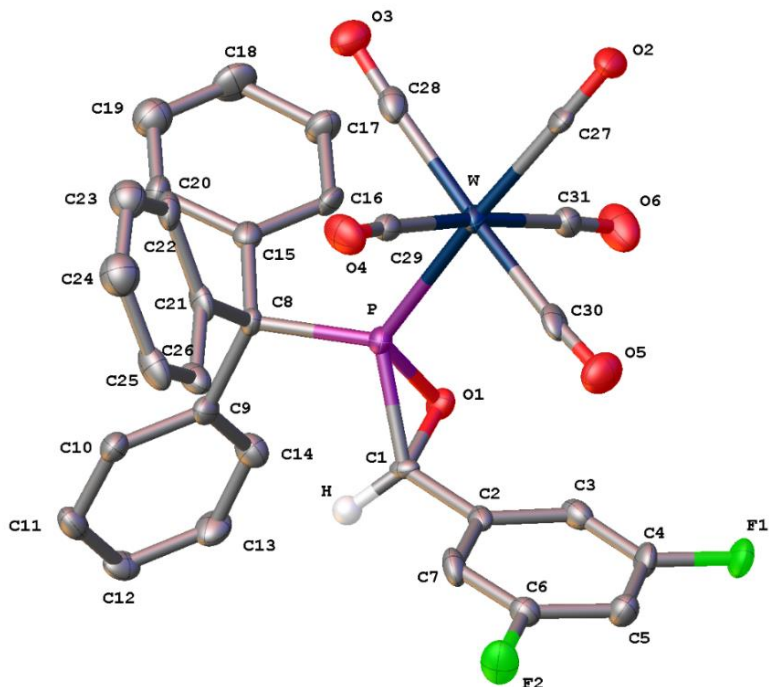

**Figure S 15:** Molecular structure of **3c** of the (2*R*,3*R*)-enantiomer in the single crystal (50% probability level). The hydrogen atoms, except the hydrogen atom of the oxaphosphirane ring, are omitted for clarity. Details for this and the following structures can be obtained from the CCDC data base by citing the numbers 2382051-2382055.

Bond lengths in Å

|    |     |            |     |     |           |
|----|-----|------------|-----|-----|-----------|
| W  | P   | 2.4715(13) | C6  | C7  | 1.366(8)  |
| W  | C27 | 2.013(5)   | C8  | C9  | 1.546(7)  |
| W  | C28 | 2.053(7)   | C8  | C15 | 1.537(9)  |
| W  | C29 | 2.048(6)   | C8  | C21 | 1.554(7)  |
| W  | C30 | 2.042(8)   | C9  | C10 | 1.397(8)  |
| W  | C31 | 2.053(6)   | C9  | C14 | 1.394(7)  |
| P  | O1  | 1.669(4)   | C10 | C11 | 1.390(7)  |
| P  | C1  | 1.790(5)   | C11 | C12 | 1.377(8)  |
| P  | C8  | 1.893(5)   | C12 | C13 | 1.402(8)  |
| F1 | C4  | 1.360(6)   | C13 | C14 | 1.368(7)  |
| F2 | C6  | 1.359(7)   | C15 | C16 | 1.398(8)  |
| O1 | C1  | 1.481(7)   | C15 | C20 | 1.397(8)  |
| O2 | C27 | 1.149(6)   | C16 | C17 | 1.377(8)  |
| O3 | C28 | 1.140(7)   | C17 | C18 | 1.389(8)  |
| O4 | C29 | 1.135(7)   | C18 | C19 | 1.375(9)  |
| O5 | C30 | 1.161(8)   | C19 | C20 | 1.379(10) |
| O6 | C31 | 1.129(7)   | C21 | C22 | 1.383(8)  |
| C1 | C2  | 1.495(8)   | C21 | C26 | 1.392(9)  |
| C2 | C3  | 1.385(7)   | C22 | C23 | 1.387(8)  |
| C2 | C7  | 1.370(9)   | C23 | C24 | 1.356(9)  |
| C3 | C4  | 1.366(9)   | C24 | C25 | 1.406(9)  |
| C4 | C5  | 1.372(9)   | C25 | C26 | 1.384(8)  |

Bond angles in °

|     |    |     |            |     |     |     |          |
|-----|----|-----|------------|-----|-----|-----|----------|
| C27 | W  | P   | 173.99(16) | C6  | C7  | C2  | 119.3(5) |
| C27 | W  | C28 | 88.0(2)    | C9  | C8  | P   | 115.1(4) |
| C27 | W  | C29 | 91.5(2)    | C9  | C8  | C21 | 112.2(4) |
| C27 | W  | C30 | 86.2(2)    | C15 | C8  | P   | 110.2(3) |
| C27 | W  | C31 | 89.6(2)    | C15 | C8  | C9  | 106.9(5) |
| C28 | W  | P   | 92.69(16)  | C15 | C8  | C21 | 114.2(4) |
| C28 | W  | C31 | 94.4(2)    | C21 | C8  | P   | 98.3(4)  |
| C29 | W  | P   | 94.45(14)  | C10 | C9  | C8  | 121.8(4) |
| C29 | W  | C28 | 90.6(2)    | C14 | C9  | C8  | 120.2(5) |
| C29 | W  | C31 | 174.8(2)   | C14 | C9  | C10 | 117.8(5) |
| C30 | W  | P   | 93.74(14)  | C11 | C10 | C9  | 120.3(5) |
| C30 | W  | C28 | 171.7(2)   | C12 | C11 | C10 | 121.3(5) |
| C30 | W  | C29 | 83.6(2)    | C11 | C12 | C13 | 118.4(5) |
| C30 | W  | C31 | 91.4(2)    | C14 | C13 | C12 | 120.3(5) |
| C31 | W  | P   | 84.43(15)  | C13 | C14 | C9  | 121.7(5) |
| O1  | P  | W   | 117.02(13) | C16 | C15 | C8  | 122.5(5) |
| O1  | P  | C1  | 50.5(2)    | C20 | C15 | C8  | 119.9(5) |
| O1  | P  | C8  | 107.9(2)   | C20 | C15 | C16 | 117.4(6) |
| C1  | P  | W   | 126.14(18) | C17 | C16 | C15 | 121.0(5) |
| C1  | P  | C8  | 107.0(2)   | C16 | C17 | C18 | 121.0(6) |
| C8  | P  | W   | 124.55(16) | C19 | C18 | C17 | 118.1(7) |
| C1  | O1 | P   | 69.0(2)    | C18 | C19 | C20 | 121.5(6) |
| O1  | C1 | P   | 60.5(3)    | C19 | C20 | C15 | 120.9(6) |
| O1  | C1 | C2  | 116.4(4)   | C22 | C21 | C8  | 123.8(6) |
| C2  | C1 | P   | 123.4(4)   | C22 | C21 | C26 | 118.3(5) |
| C3  | C2 | C1  | 119.7(5)   | C26 | C21 | C8  | 117.8(5) |
| C7  | C2 | C1  | 120.4(5)   | C21 | C22 | C23 | 119.6(7) |
| C7  | C2 | C3  | 120.0(6)   | C24 | C23 | C22 | 121.9(6) |
| C4  | C3 | C2  | 118.9(6)   | C23 | C24 | C25 | 119.8(6) |
| F1  | C4 | C3  | 119.9(6)   | C26 | C25 | C24 | 118.0(7) |
| F1  | C4 | C5  | 116.5(6)   | C25 | C26 | C21 | 122.3(5) |
| C3  | C4 | C5  | 123.6(5)   | O2  | C27 | W   | 179.3(6) |
| C4  | C5 | C6  | 115.5(6)   | O3  | C28 | W   | 176.0(5) |
| F2  | C6 | C5  | 117.6(5)   | O4  | C29 | W   | 174.5(5) |
| F2  | C6 | C7  | 119.6(5)   | O5  | C30 | W   | 172.5(5) |
| C7  | C6 | C5  | 122.8(6)   | O6  | C31 | W   | 177.2(6) |

#### 1.2.4 Synthesis of 2-Triphenylmethyl-3-(3,5-difluorophenyl)oxaphosphirane 4a

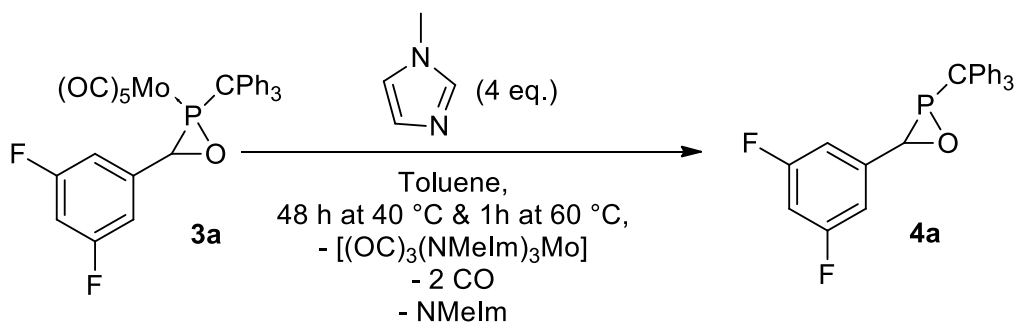



To a solution of 749.4 mg **3a** (1.149 mmol, 1.00 eq) in 55 mL of toluene, 0.37 mL 1-methylimidazole (4.595 mmol, 4.00 eq) were added. The solution was stirred for 48h at 40 °C and 1h at 60 °C, and the solution turned from slightly yellow to yellow and a yellow solid precipitated out of solution. The solvent was removed under reduced pressure ( $1 \times 10^{-2}$  mbar) and a brown-yellow residue was obtained. The residue was dissolved in 10 mL of  $\text{CH}_2\text{Cl}_2$  and purified by column chromatography ( $h = 10$  cm,  $\varnothing = 3$  cm,  $\text{Al}_2\text{O}_3$ , Eluent: PE:Et<sub>2</sub>O (50:50), -20 °C). After collecting 150 mL of a yellow fraction, the solvent was removed under reduced pressure ( $1 \times 10^{-2}$  mbar) and a yellow residue was obtained. The residue was washed eight times with 1 mL of -pentane at -50 °C and after drying under reduced pressure ( $1 \times 10^{-2}$  mbar), the product was obtained as a slightly yellow powder.

Yield: 318.0 mg (0.76 mmol, 66 %).

Melting point: 118 °C.

Elemental analysis: calculated.: C 75.00 H 4.60 found: C 73.48 H 4.74 N 0.15.

MS (LIFDI):  $m/z$  (%) = 243.2 [ $\text{CPh}_3$ ]<sup>++</sup> (100), 173.1 [ $\text{M-CPh}_3$ ]<sup>++</sup> (16).

IR (ATR diamond):  $\text{cm}^{-1} = 1624$  (m,  $\nu(\text{C}=\text{C})$ ), 1593 (m,  $\nu(\text{C}=\text{C})$ ), 1116 (m,  $\nu(\text{C}-\text{F})$ ), 861 (m,  $\delta(\text{C}^{\text{ArF}}-\text{H})_{\text{oop}}$ ), 836 (m,  $\delta(\text{C}^{\text{ArF}}-\text{H})_{\text{oop}}$ ), 729 (m,  $\delta(\text{C}^{\text{Ar}}-\text{H})_{\text{oop}}$ ), 704 (m,  $\delta(\text{C}^{\text{Ar}}-\text{H})_{\text{oop}}$ ).

<sup>1</sup>H-NMR (500.04 MHz, 298.0 K,  $\text{CDCl}_3$ ):  $\delta$  /ppm = 3.20 (s, 1H, PC(H)O), 6.67 (tt, <sup>3</sup> $J_{\text{F,H}} = 8.8$  Hz, <sup>4</sup> $J_{\text{H,H}} = 2.3$  Hz, 1H, *p*-Aryl<sup>F</sup>), 6.69 – 6.73 (m, 2 H, *o*-Aryl<sup>F</sup>), 7.21 – 7.25 (m, 6H, *o*-CPh<sub>3</sub>), 7.28 – 7.34 (m, 3H, *p*-CPh<sub>3</sub>), 7.34 – 7.40 (m, 6H, *m*-CPh<sub>3</sub>).

<sup>13</sup>C{<sup>1</sup>H}-NMR (125.75 MHz, 298.0 K,  $\text{CDCl}_3$ ):  $\delta$  /ppm = 55.2 (dt, <sup>1</sup> $J_{\text{P,C}} = 15.3$  Hz, <sup>4</sup> $J_{\text{F,C}} = 2.7$  Hz, PCO), 62.4 (d, <sup>1</sup> $J_{\text{P,C}} = 59.2$  Hz, Ph<sub>3</sub>C-P), 103.1 (t, <sup>2</sup> $J_{\text{F,C}} = 25.5$  Hz, *p*-Aryl<sup>F</sup>), 108.2 (ddd, <sup>2</sup> $J_{\text{F,C}} = 20.1$  Hz, <sup>4</sup> $J_{\text{F,C}} = 6.3$  Hz, <sup>3</sup> $J_{\text{P,C}} = 3.0$  Hz, *o*-Aryl<sup>F</sup>), 127.4 (s, *p*-CPh<sub>3</sub>), 128.7 (s, *o*-CPh<sub>3</sub>), 130.1 (d, <sup>4</sup> $J_{\text{P,C}} = 7.9$  Hz, *m*-CPh<sub>3</sub>), 141.4 (d, <sup>1</sup> $J_{\text{P,C}} = 9.0$  Hz, *ipso*-CPh<sub>3</sub>), 142.9 (q, <sup>2</sup> $J_{\text{P,C}} = 9.0$  Hz, <sup>4</sup> $J_{\text{F,C}} = 9.0$  Hz, *ipso*-Aryl<sup>F</sup>), 163.3 (dd, <sup>1</sup> $J_{\text{F,C}} = 249.0$  Hz, <sup>4</sup> $J_{\text{P,C}} = 12.8$  Hz, *m*-Aryl<sup>F</sup>).

<sup>19</sup>F-NMR (470.44 MHz, 298.0 K,  $\text{CDCl}_3$ ):  $\delta$  /ppm = -109.3 (dd, <sup>3</sup> $J_{\text{F,H}} = 8.0$  Hz, <sup>3</sup> $J_{\text{F,H}} = 8.0$  Hz).

<sup>31</sup>P{<sup>1</sup>H}-NMR (202.44 MHz, 298.0 K,  $\text{CDCl}_3$ ):  $\delta$  /ppm = -26.0.

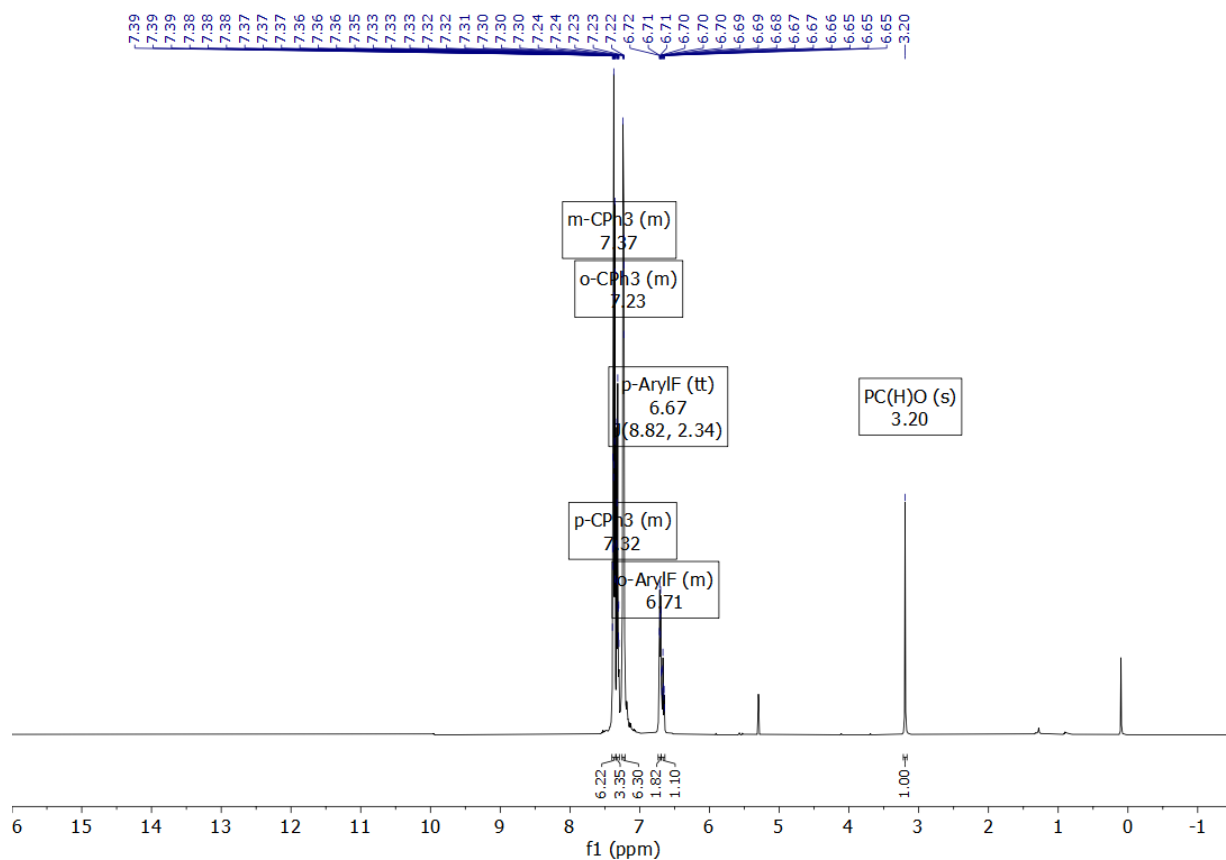

Figure S 16:  $^1\text{H}$ -NMR spectrum in  $\text{CDCl}_3$ .

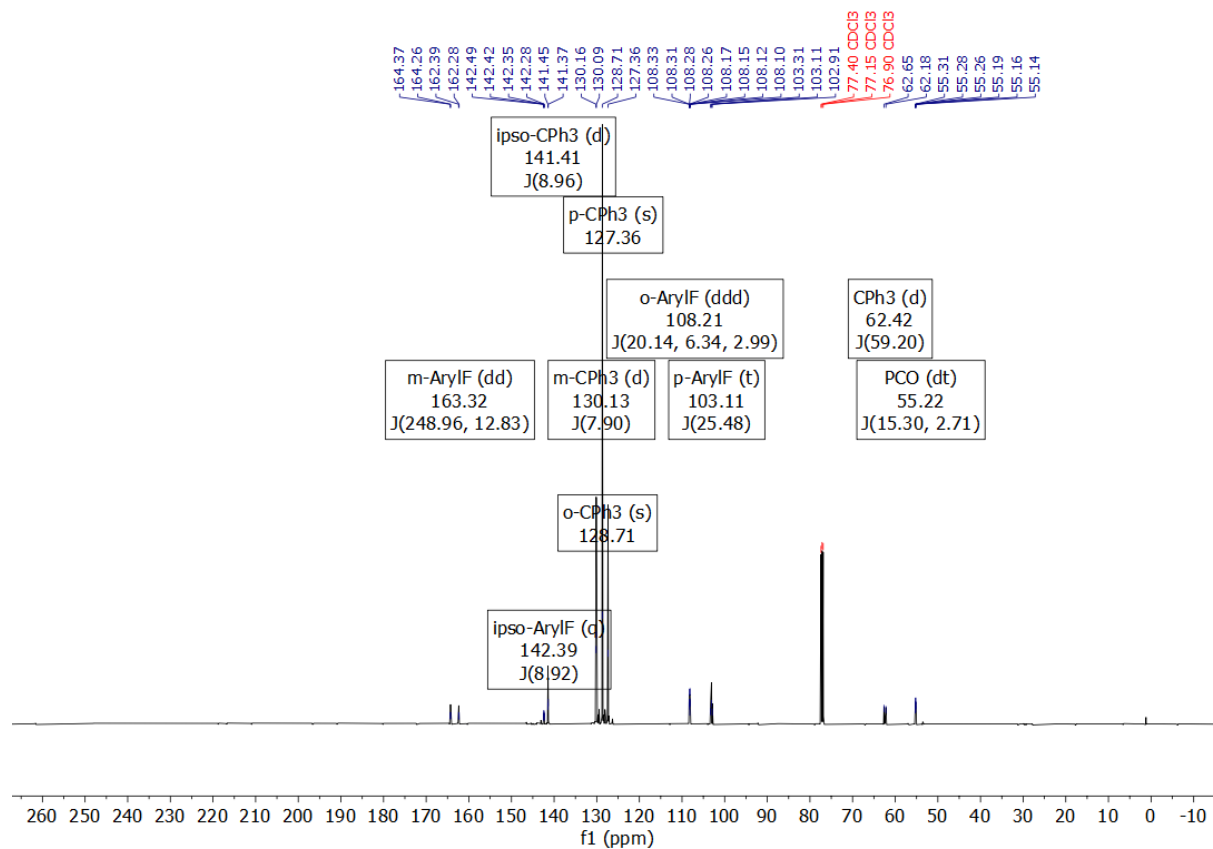

Figure S 17:  $^{13}\text{C}\{^1\text{H}\}$ -NMR spectrum in  $\text{CDCl}_3$ .

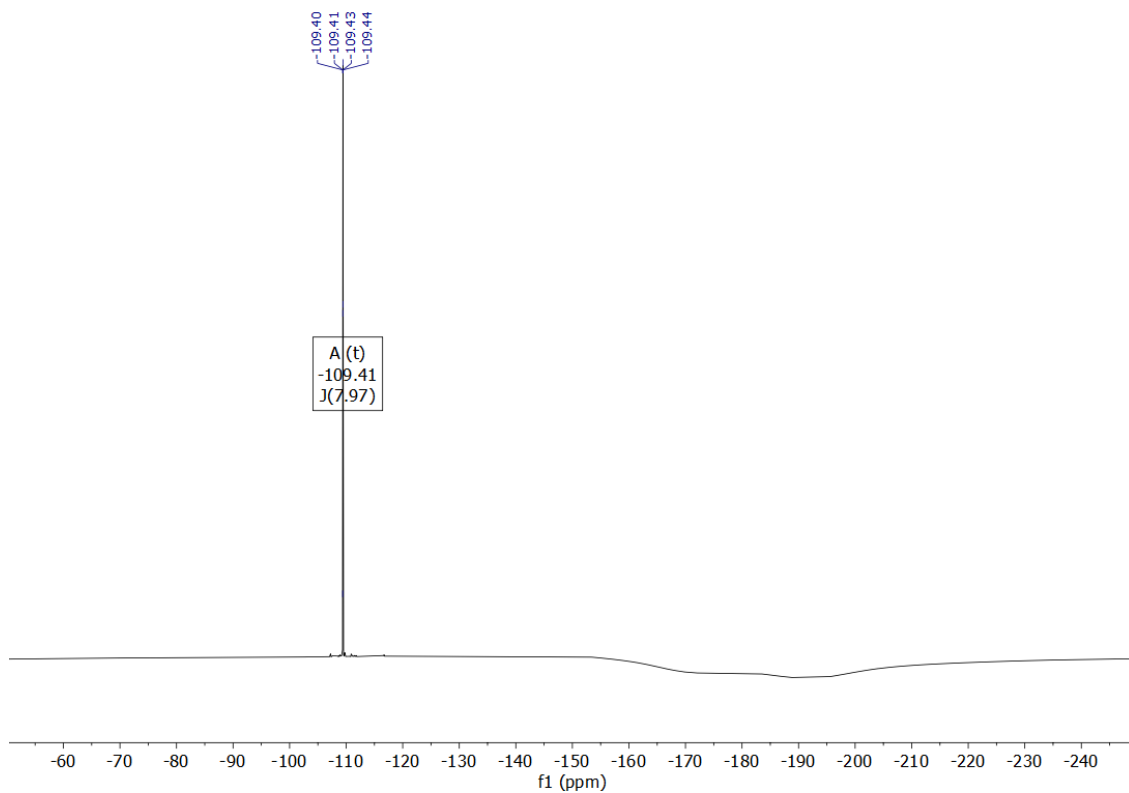

**Figure S 18:**  $^{19}\text{F}\{^1\text{H}\}$ -NMR spectrum in  $\text{CDCl}_3$ .

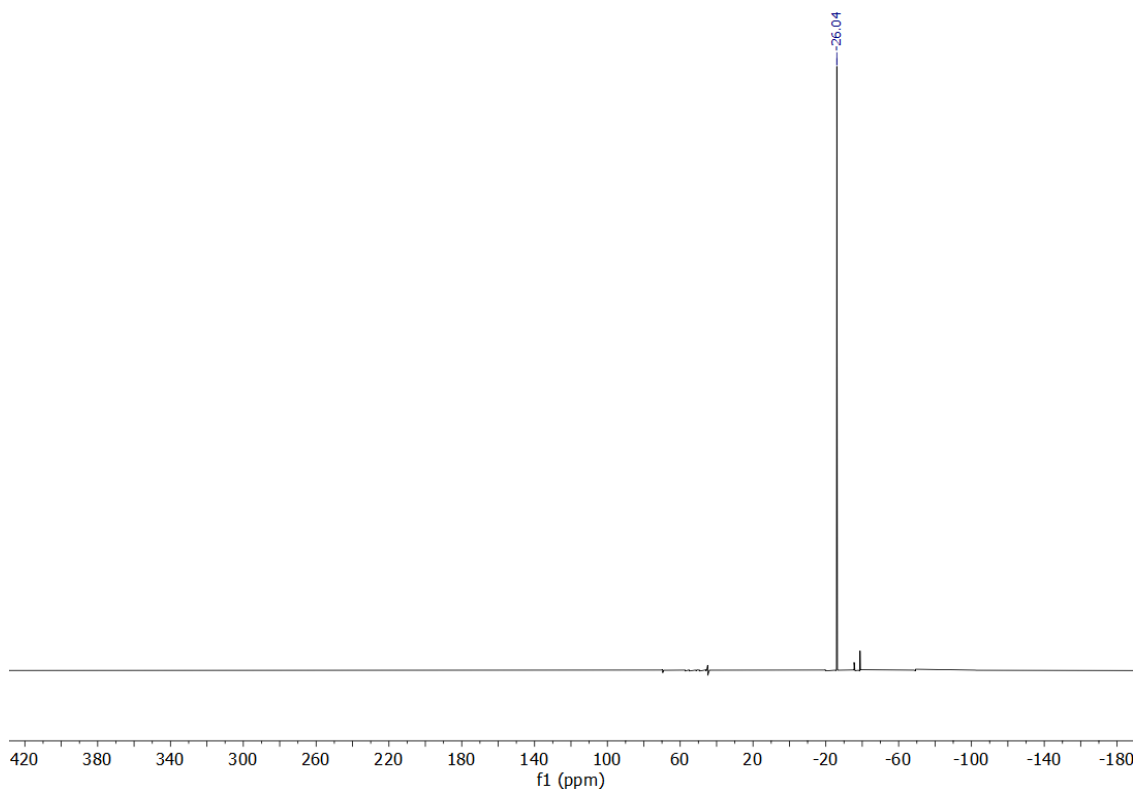

**Figure S 19:**  $^{31}\text{P}\{^1\text{H}\}$ -NMR spectrum in  $\text{CDCl}_3$ .

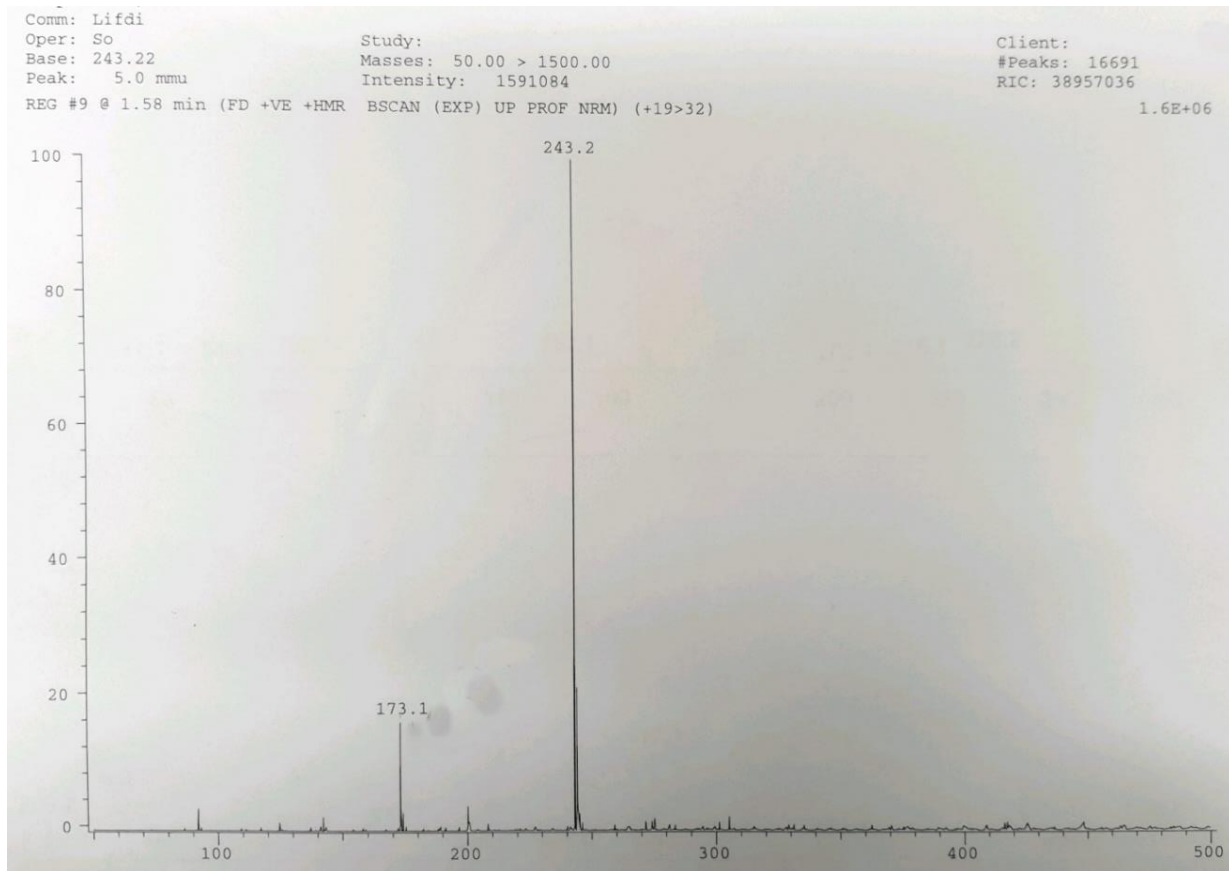

**Figure S 20:** MS spectrum (LIFDI) of **4a**.

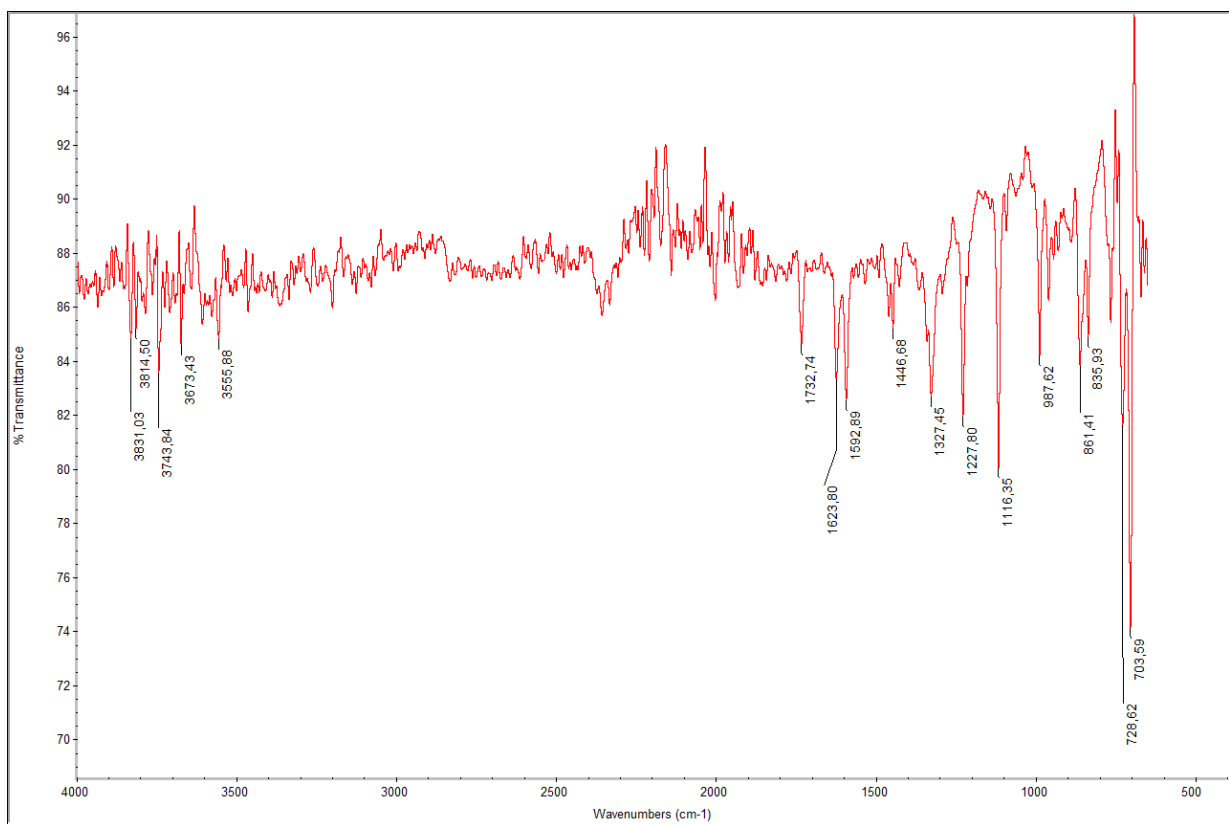

**Figure S 21:** IR spectrum of **4a**.

## Molecular structure of 4a

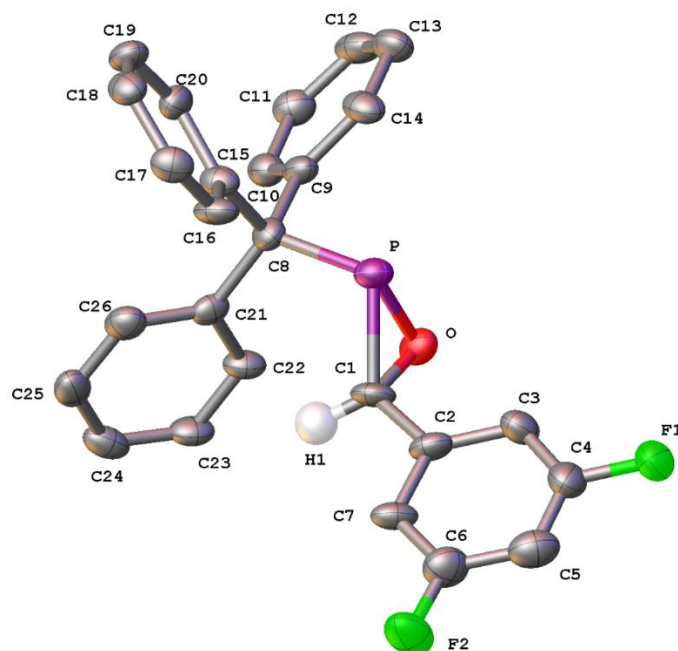

**Figure S 22:** Molecular structure of **4a** of the (2*S*,3*R*)-enantiomer in the single crystal (50% probability level). The hydrogen atoms, except the hydrogen atom of the oxaphosphirane ring, are omitted for clarity.

### Bond lengths in Å

|    |     |           |  |     |     |           |
|----|-----|-----------|--|-----|-----|-----------|
| P  | O   | 1.685(7)  |  | C9  | C14 | 1.393(13) |
| P  | C1  | 1.835(8)  |  | C10 | C11 | 1.412(13) |
| P  | C8  | 1.916(9)  |  | C11 | C12 | 1.378(15) |
| F1 | C4  | 1.361(11) |  | C12 | C13 | 1.366(16) |
| F2 | C6  | 1.334(13) |  | C13 | C14 | 1.386(14) |
| O  | C1  | 1.456(11) |  | C15 | C16 | 1.381(13) |
| C1 | C2  | 1.500(13) |  | C15 | C20 | 1.399(12) |
| C2 | C3  | 1.379(14) |  | C16 | C17 | 1.399(13) |
| C2 | C7  | 1.373(13) |  | C17 | C18 | 1.380(13) |
| C3 | C4  | 1.396(14) |  | C18 | C19 | 1.376(13) |
| C4 | C5  | 1.347(16) |  | C19 | C20 | 1.417(13) |
| C5 | C6  | 1.371(17) |  | C21 | C22 | 1.431(12) |
| C6 | C7  | 1.390(13) |  | C21 | C26 | 1.374(13) |
| C8 | C9  | 1.540(12) |  | C22 | C23 | 1.383(13) |
| C8 | C15 | 1.551(11) |  | C23 | C24 | 1.378(15) |
| C8 | C21 | 1.539(12) |  | C24 | C25 | 1.404(15) |
| C9 | C10 | 1.356(14) |  | C25 | C26 | 1.382(14) |

### Bond angles in °

|    |    |    |          |  |     |     |     |          |
|----|----|----|----------|--|-----|-----|-----|----------|
| O  | P  | C1 | 48.6(4)  |  | C10 | C9  | C8  | 122.8(8) |
| O  | P  | C8 | 104.2(4) |  | C10 | C9  | C14 | 118.6(8) |
| C1 | P  | C8 | 107.8(4) |  | C14 | C9  | C8  | 118.5(9) |
| C1 | O  | P  | 71.1(4)  |  | C9  | C10 | C11 | 121.2(9) |
| O  | C1 | P  | 60.3(4)  |  | C12 | C11 | C10 | 118.6(9) |

|     |    |     |           |  |     |     |     |           |
|-----|----|-----|-----------|--|-----|-----|-----|-----------|
| O   | C1 | C2  | 115.7(8)  |  | C13 | C12 | C11 | 121.2(9)  |
| C2  | C1 | P   | 121.3(7)  |  | C12 | C13 | C14 | 119.1(9)  |
| C3  | C2 | C1  | 120.5(8)  |  | C13 | C14 | C9  | 121.3(10) |
| C7  | C2 | C1  | 118.1(9)  |  | C16 | C15 | C8  | 121.1(8)  |
| C7  | C2 | C3  | 121.4(9)  |  | C16 | C15 | C20 | 117.7(8)  |
| C2  | C3 | C4  | 115.5(8)  |  | C20 | C15 | C8  | 121.2(8)  |
| F1  | C4 | C3  | 116.2(9)  |  | C15 | C16 | C17 | 122.1(8)  |
| C5  | C4 | F1  | 118.9(10) |  | C18 | C17 | C16 | 119.3(8)  |
| C5  | C4 | C3  | 124.8(10) |  | C19 | C18 | C17 | 120.6(8)  |
| C4  | C5 | C6  | 118.0(10) |  | C18 | C19 | C20 | 119.5(8)  |
| F2  | C6 | C5  | 120.5(9)  |  | C15 | C20 | C19 | 120.7(8)  |
| F2  | C6 | C7  | 119.5(10) |  | C22 | C21 | C8  | 117.9(8)  |
| C5  | C6 | C7  | 119.9(10) |  | C26 | C21 | C8  | 122.7(8)  |
| C2  | C7 | C6  | 120.2(10) |  | C26 | C21 | C22 | 119.3(8)  |
| C9  | C8 | P   | 105.6(6)  |  | C23 | C22 | C21 | 118.6(9)  |
| C9  | C8 | C15 | 109.2(7)  |  | C24 | C23 | C22 | 121.1(9)  |
| C15 | C8 | P   | 103.4(6)  |  | C23 | C24 | C25 | 120.2(8)  |
| C21 | C8 | P   | 113.9(6)  |  | C26 | C25 | C24 | 119.0(9)  |
| C21 | C8 | C9  | 113.9(8)  |  | C21 | C26 | C25 | 121.6(9)  |
| C21 | C8 | C15 | 110.2(7)  |  |     |     |     |           |

### 1.2.5 2-Triphenylmethyl-3-(3,5-bis(trifluoromethyl)phenyl)oxaphosphirane 4b

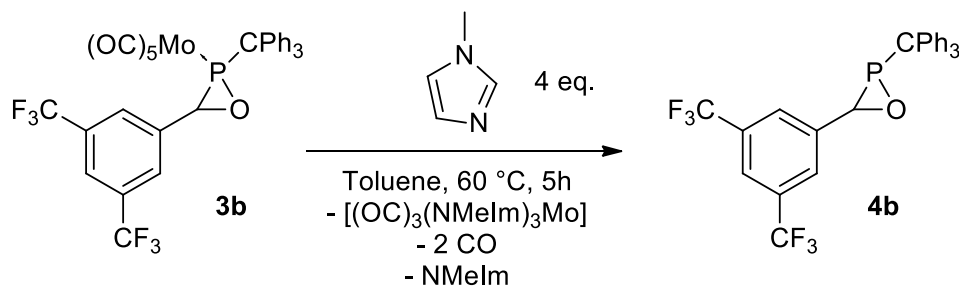

To a solution of 417.9 mg **3b** (0.56 mmol, 1.00 eq) in 30 mL of toluene, 0.18 mL 1-methylimidazole (2.22 mmol, 4.00 eq) were added. The solution was stirred for 5h at 60 °C, and the solution turned from slightly yellow to yellow and a yellow solid precipitated out of solution. The solvent was removed under reduced pressure ( $1 \times 10^{-2}$  mbar) and a brown-yellow residue was obtained. The residue was dissolved in 10 mL of  $\text{CH}_2\text{Cl}_2$  and purified by column chromatography ( $h = 9$  cm,  $\varnothing = 3$  cm,  $\text{Al}_2\text{O}_3$ , eluent: petroleum ether: $\text{Et}_2\text{O}$  (50:50),  $-20$  °C). After collecting 150 mL of a yellow fraction, the solvent was removed under reduced pressure ( $1 \times 10^{-2}$  mbar) and a yellow residue was obtained. The residue was washed five times with 1 mL of  $n$ -pentane at  $-50$  °C and after drying under reduced pressure ( $1 \times 10^{-2}$  mbar), the product was obtained as a colorless powder.

Yield: 214.3 mg (0.415 mmol, 75%).

Melting point: 132 °C.

Elemental analysis: calculated.: C 65.12 H 3.71 found: C 65.55 H 4.06

MS (LIFDI):  $m/z$  (%) = 273.2 [ $\text{M-CPh}_3$ ] $^{+\bullet}$  (16), 243.2 [ $\text{CPh}_3$ ] $^{+\bullet}$  (100).

IR (ATR diamond):  $\nu$  /  $\text{cm}^{-1}$  = 1131 (s,  $\nu(\text{C-F})$ ), 900 (m,  $\delta(\text{C}^{\text{ArF}}\text{-H})_{\text{oop}}$ ), 843 (m,  $\delta(\text{C}^{\text{ArF}}\text{-H})_{\text{oop}}$ ), 729 (w,  $\delta(\text{C}^{\text{Ar}}\text{-H})_{\text{oop}}$ ), 705 (m,  $\delta(\text{C}^{\text{Ar}}\text{-H})_{\text{oop}}$ ), 682 (w,  $\delta(\text{C}^{\text{Ar}}\text{-H})_{\text{oop}}$ ).

$^1\text{H-NMR}$  (300.13 MHz, 299.4 K,  $\text{C}_6\text{D}_6$ ):  $\delta$  / ppm = 3.46 (s, 1H,  $\text{PC}(\text{H})\text{O}$ ), 7.00 - 7.12 (m, 9H, *o*- and *p*- $\text{CPh}_3$ ), 7.30 - 7.36 (m, 6H, *m*- $\text{CPh}_3$ ), 7.39 (s, 2H, *o*- $\text{Ar}^{\text{CF}_3}$ ), 7.51 (s, 1H, *p*- $\text{Ar}^{\text{CF}_3}$ ).

$^{13}\text{C}\{^1\text{H}\}\text{-NMR}$  (75.48 MHz, 299.4 K,  $\text{C}_6\text{D}_6$ ):  $\delta$  / ppm = 55.1 (dd,  $^1J_{\text{P,C}} = 16.2$  Hz,  $^5J_{\text{F,C}} = 2.7$  Hz,  $\text{PCO}$ ), 62.9 (d,  $^1J_{\text{P,C}} = 59.8$  Hz,  $\text{Ph}_3\text{C-P}$ ), 121.3 (t,  $^5J_{\text{P,C}} = 3.7$  Hz, *p*- $\text{Aryl}^{\text{CF}_3}$ ), 123.7 (q,  $^1J_{\text{F,C}} = 272.9$  Hz,  $\text{CF}_3$ ), 125.3 (m, *o*- $\text{Aryl}^{\text{CF}_3}$ ), 127.7 (d,  $^5J_{\text{P,C}} = 1.1$  Hz, *p*- $\text{CPh}_3$ ), 129.0 (s, *o*- $\text{CPh}_3$ ), 130.4 (d,  $^4J_{\text{P,C}} = 7.9$  Hz, *m*- $\text{CPh}_3$ ), 132.0 (q,  $^2J_{\text{F,C}} = 33.3$  Hz, *m*- $\text{Aryl}^{\text{CF}_3}$ ), 141.6 (d,  $^2J_{\text{P,C}} = 7.5$  Hz, *ipso*- $\text{Aryl}^{\text{CF}_3}$ ), 141.7 (d,  $^2J_{\text{P,C}} = 9.1$  Hz, *ipso*- $\text{CPh}_3$ ).

$^{19}\text{F}\{^1\text{H}\}\text{-NMR}$  (282.4 MHz, 298.4 K,  $\text{C}_6\text{D}_6$ ):  $\delta$  / ppm = -109.3.

$^{31}\text{P}\{^1\text{H}\}\text{-NMR}$  (121.51 MHz, 299.4 K,  $\text{C}_6\text{D}_6$ ):  $\delta$  / ppm = -25.5.

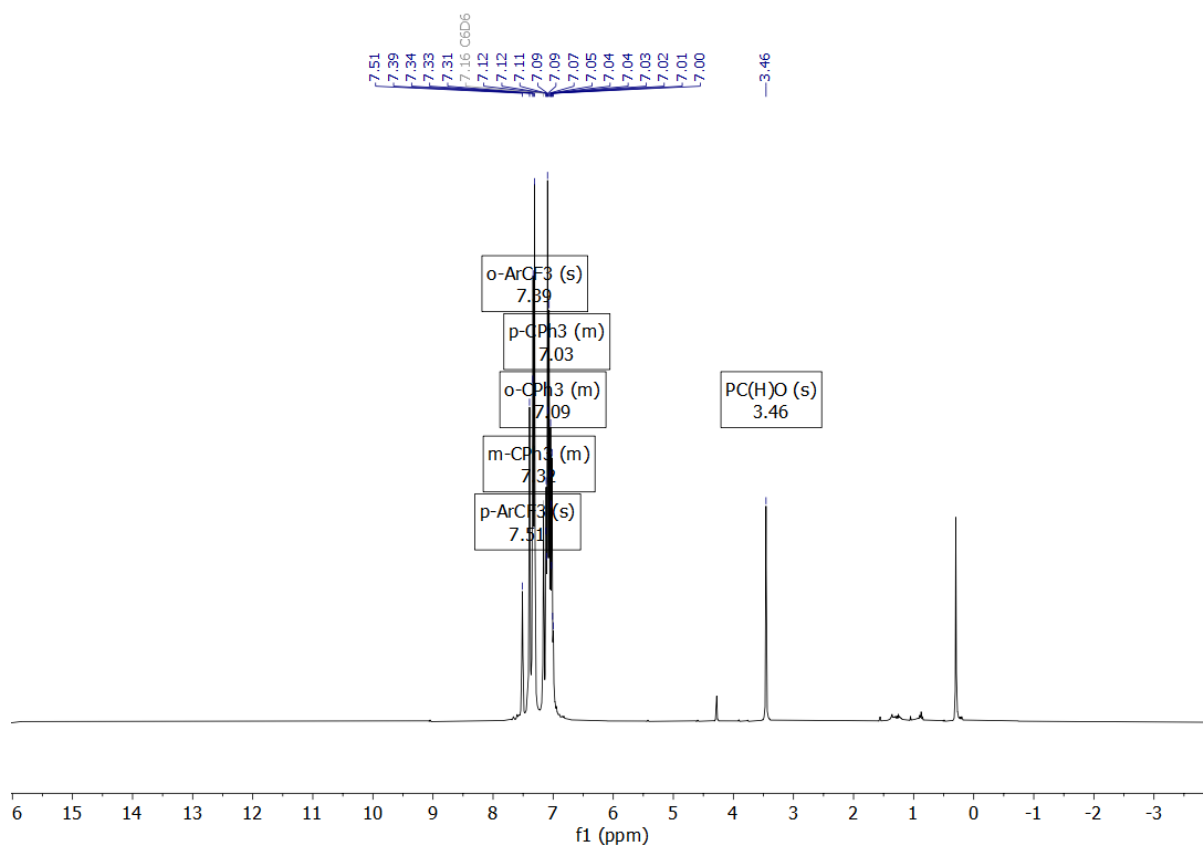

**Figure S 23:**  $^1\text{H-NMR}$  spectrum in  $\text{C}_6\text{D}_6$ .

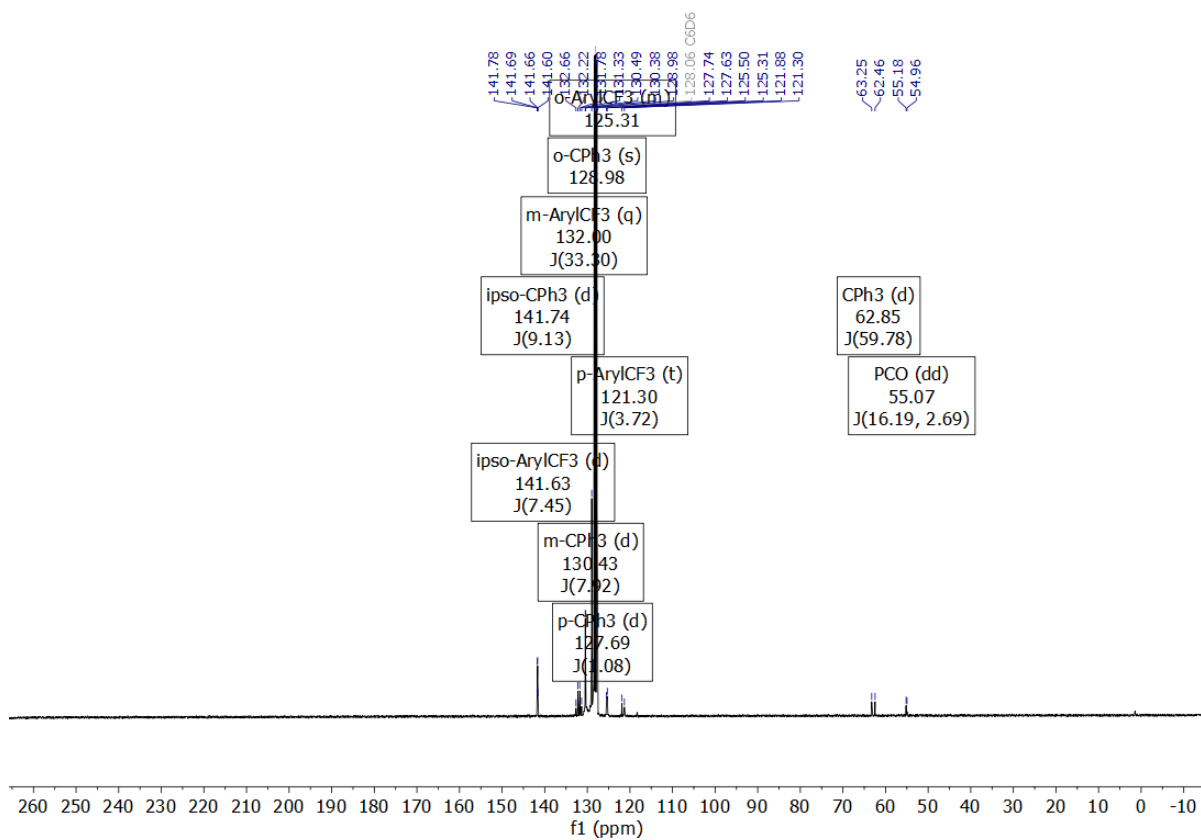

Figure S 24:  $^{13}\text{C}\{^1\text{H}\}$ -NMR spectrum in  $\text{C}_6\text{D}_6$ .

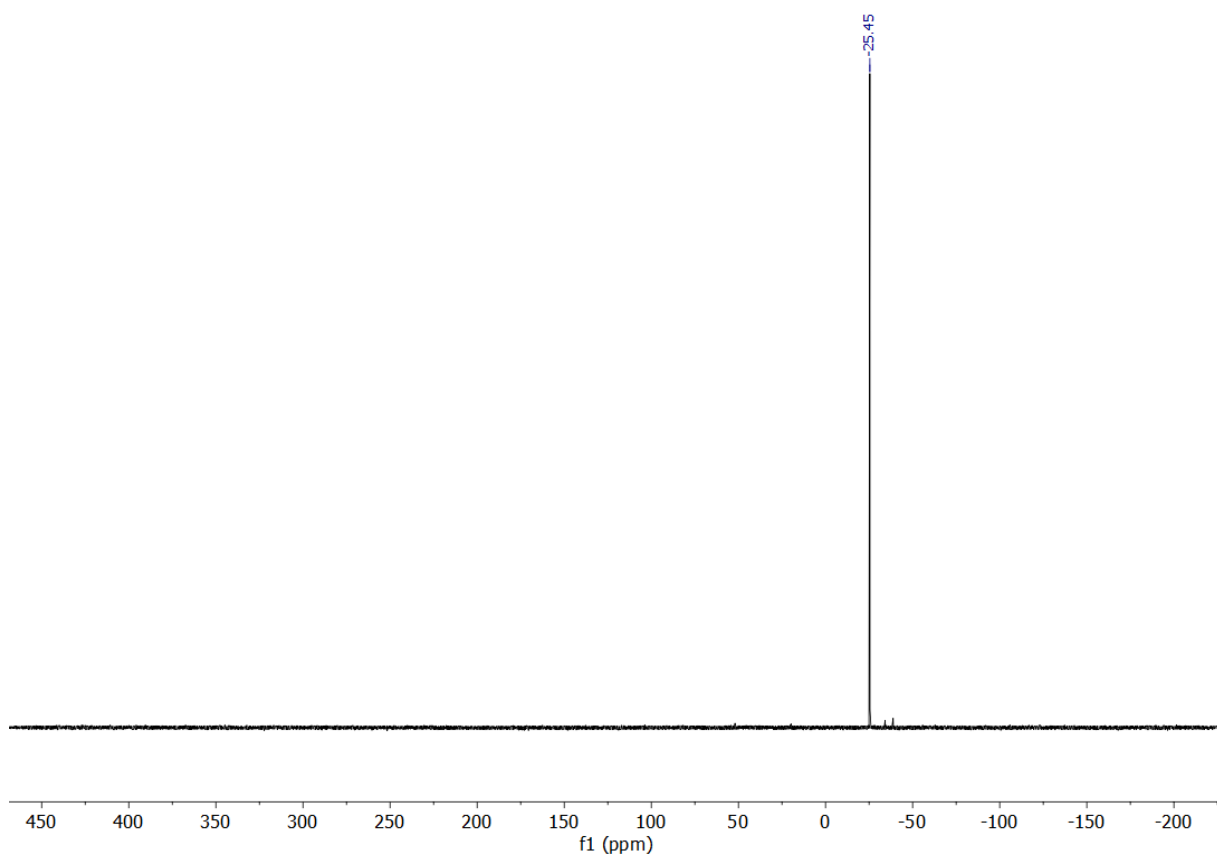

Figure S 25:  $^{31}\text{P}\{^1\text{H}\}$ -NMR spectrum in  $\text{C}_6\text{D}_6$ .



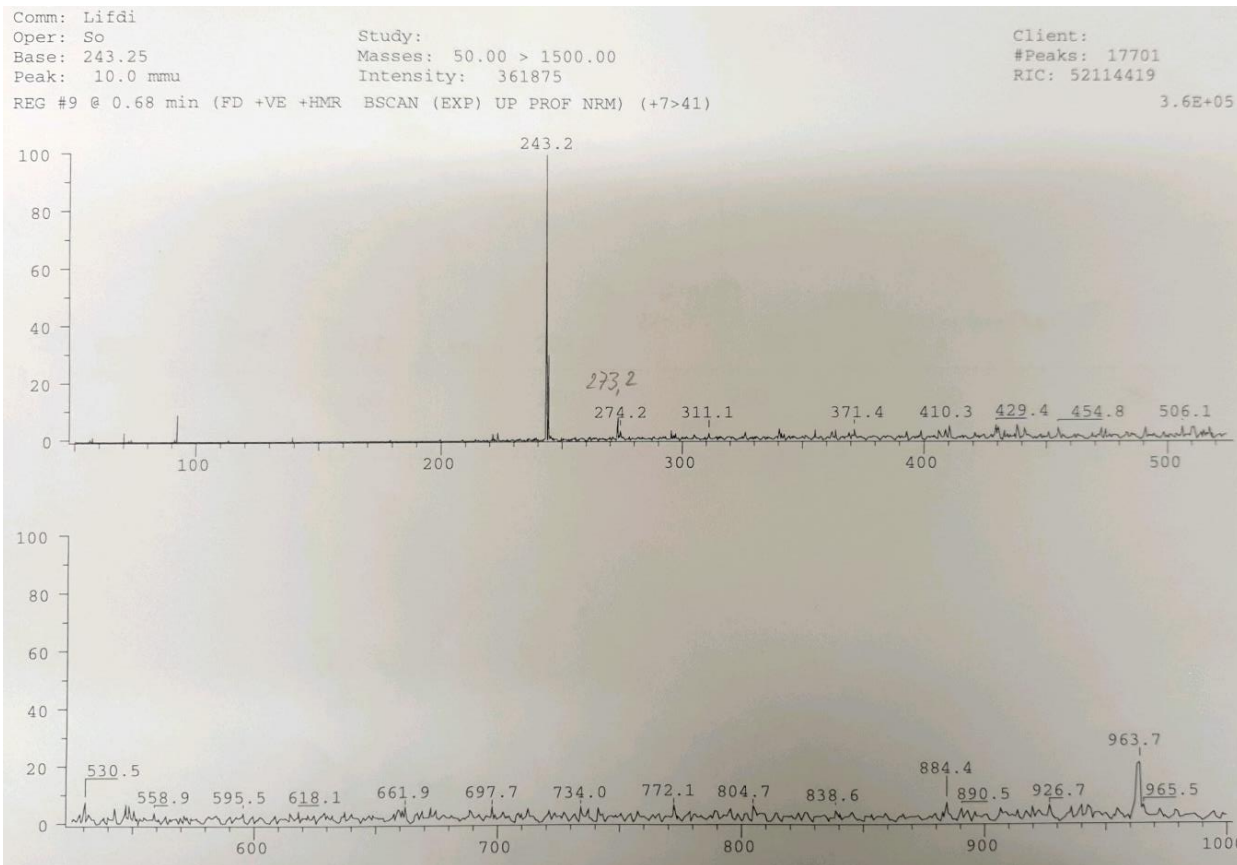

Figure S 26: MS spectrum (LIFDI) of 4b.

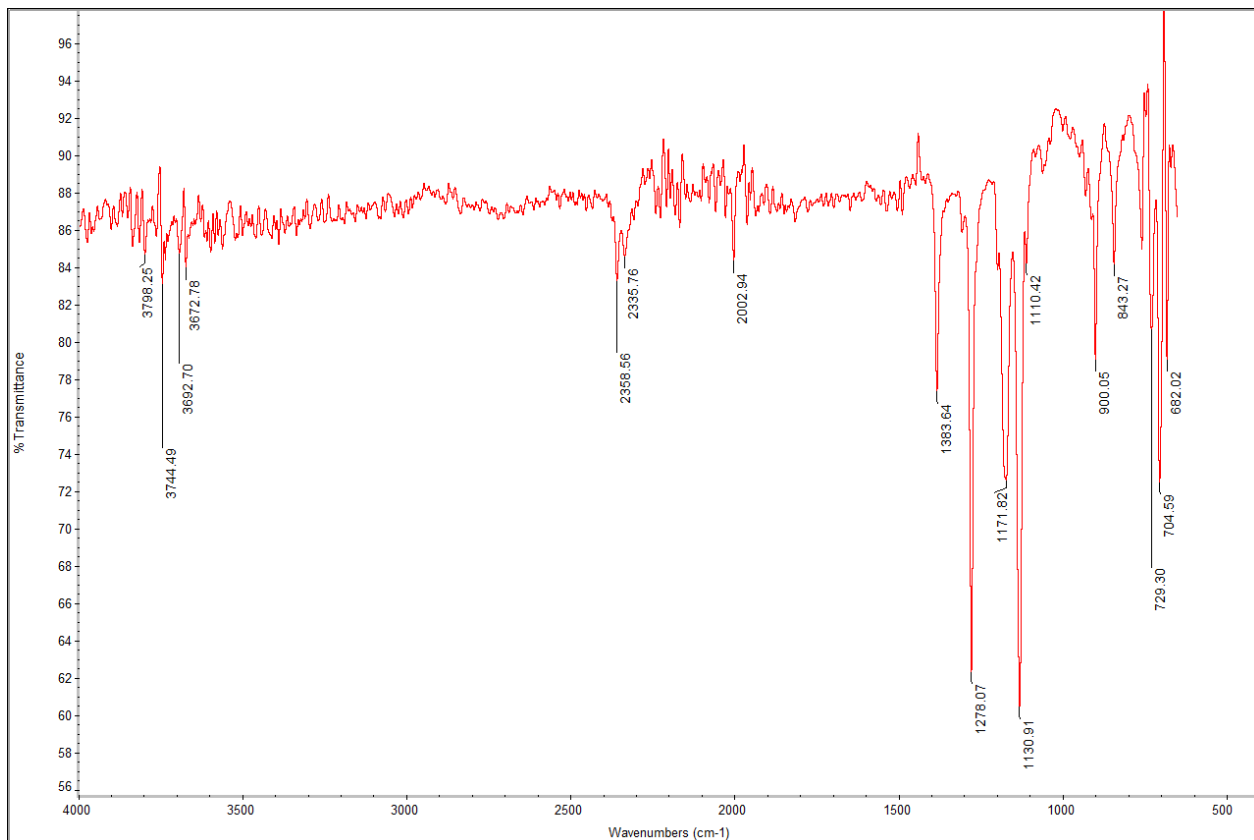

Figure S 27: IR spectrum of 4b.

## Molecular structure of 4b

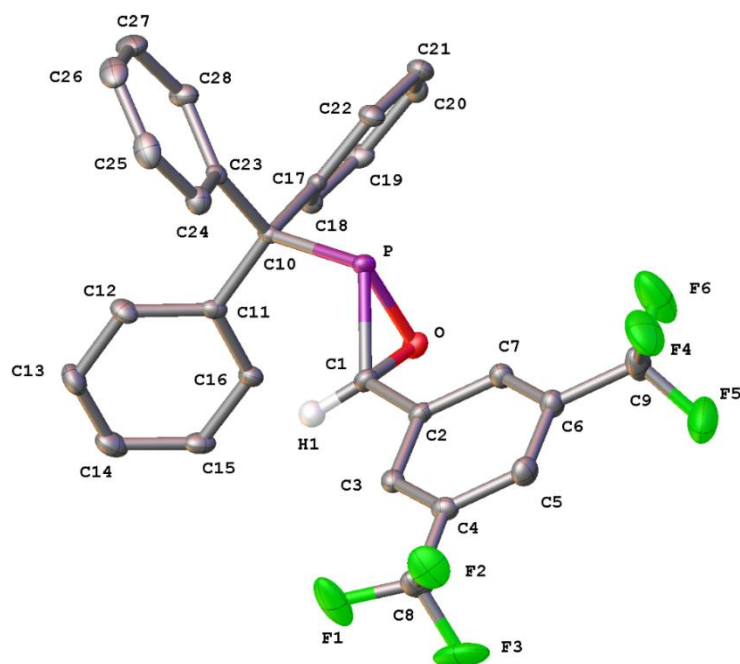

**Figure S 28:** Molecular structure of **4b** of the (2*S*,3*R*)-enantiomer in the single crystal (50% probability level). The hydrogen atoms, except the hydrogen atom of the oxaphosphirane ring, are omitted for clarity.

Bond lengths in Å

|     |     |          |     |     |          |
|-----|-----|----------|-----|-----|----------|
| P   | O   | 1.682(3) | C10 | C17 | 1.538(5) |
| P   | C1  | 1.819(4) | C10 | C23 | 1.537(5) |
| P   | C10 | 1.917(4) | C11 | C12 | 1.402(6) |
| F1  | C8  | 1.334(6) | C11 | C16 | 1.400(6) |
| F2  | C8  | 1.323(6) | C12 | C13 | 1.405(6) |
| F3  | C8  | 1.337(6) | C13 | C14 | 1.371(7) |
| F4  | C9  | 1.330(6) | C14 | C15 | 1.384(6) |
| F5  | C9  | 1.332(6) | C15 | C16 | 1.393(6) |
| F6  | C9  | 1.326(6) | C17 | C18 | 1.396(6) |
| O   | C1  | 1.458(5) | C17 | C22 | 1.400(6) |
| C1  | C2  | 1.486(5) | C18 | C19 | 1.392(6) |
| C2  | C3  | 1.394(6) | C19 | C20 | 1.403(6) |
| C2  | C7  | 1.395(5) | C20 | C21 | 1.374(6) |
| C3  | C4  | 1.391(6) | C21 | C22 | 1.387(6) |
| C4  | C5  | 1.387(6) | C23 | C24 | 1.397(6) |
| C4  | C8  | 1.509(6) | C23 | C28 | 1.390(6) |
| C5  | C6  | 1.398(6) | C24 | C25 | 1.387(6) |
| C6  | C7  | 1.387(5) | C25 | C26 | 1.388(7) |
| C6  | C9  | 1.495(6) | C26 | C27 | 1.383(7) |
| C10 | C11 | 1.534(5) | C27 | C28 | 1.388(6) |

Bond angles in °

|   |   |    |           |     |     |   |          |
|---|---|----|-----------|-----|-----|---|----------|
| O | P | C1 | 49.04(16) | C11 | C10 | P | 115.9(3) |
|---|---|----|-----------|-----|-----|---|----------|

|    |    |     |            |  |     |     |     |          |
|----|----|-----|------------|--|-----|-----|-----|----------|
| O  | P  | C10 | 104.99(16) |  | C11 | C10 | C17 | 114.7(3) |
| C1 | P  | C10 | 110.74(18) |  | C11 | C10 | C23 | 111.5(3) |
| C1 | O  | P   | 70.4(2)    |  | C17 | C10 | P   | 100.2(2) |
| O  | C1 | P   | 60.57(19)  |  | C23 | C10 | P   | 101.6(2) |
| O  | C1 | C2  | 113.5(3)   |  | C23 | C10 | C17 | 111.8(3) |
| C2 | C1 | P   | 118.0(3)   |  | C12 | C11 | C10 | 120.6(4) |
| C3 | C2 | C1  | 121.0(4)   |  | C16 | C11 | C10 | 121.1(3) |
| C3 | C2 | C7  | 119.3(4)   |  | C16 | C11 | C12 | 118.2(4) |
| C7 | C2 | C1  | 119.6(4)   |  | C11 | C12 | C13 | 120.2(4) |
| C4 | C3 | C2  | 119.6(4)   |  | C14 | C13 | C12 | 120.7(4) |
| C3 | C4 | C8  | 120.5(4)   |  | C13 | C14 | C15 | 119.7(4) |
| C5 | C4 | C3  | 121.5(4)   |  | C14 | C15 | C16 | 120.5(4) |
| C5 | C4 | C8  | 118.0(4)   |  | C15 | C16 | C11 | 120.7(4) |
| C4 | C5 | C6  | 118.5(4)   |  | C18 | C17 | C10 | 123.5(3) |
| C5 | C6 | C9  | 118.5(4)   |  | C18 | C17 | C22 | 117.9(4) |
| C7 | C6 | C5  | 120.6(4)   |  | C22 | C17 | C10 | 118.6(3) |
| C7 | C6 | C9  | 120.9(4)   |  | C19 | C18 | C17 | 120.7(4) |
| C6 | C7 | C2  | 120.4(4)   |  | C18 | C19 | C20 | 120.4(4) |
| F1 | C8 | F3  | 107.2(4)   |  | C21 | C20 | C19 | 119.1(4) |
| F1 | C8 | C4  | 111.8(4)   |  | C20 | C21 | C22 | 120.6(4) |
| F2 | C8 | F1  | 107.1(4)   |  | C21 | C22 | C17 | 121.3(4) |
| F2 | C8 | F3  | 106.1(4)   |  | C24 | C23 | C10 | 119.4(4) |
| F2 | C8 | C4  | 112.3(4)   |  | C28 | C23 | C10 | 122.0(4) |
| F3 | C8 | C4  | 112.0(4)   |  | C28 | C23 | C24 | 118.6(4) |
| F4 | C9 | F5  | 104.5(4)   |  | C25 | C24 | C23 | 121.0(4) |
| F4 | C9 | C6  | 112.2(4)   |  | C24 | C25 | C26 | 119.8(4) |
| F5 | C9 | C6  | 112.2(5)   |  | C27 | C26 | C25 | 119.6(4) |
| F6 | C9 | F4  | 105.8(5)   |  | C26 | C27 | C28 | 120.7(5) |
| F6 | C9 | F5  | 108.2(4)   |  | C27 | C28 | C23 | 120.3(4) |
| F6 | C9 | C6  | 113.3(4)   |  |     |     |     |          |

Torsion angles in °

|    |     |     |     |           |  |     |     |     |     |           |
|----|-----|-----|-----|-----------|--|-----|-----|-----|-----|-----------|
| P  | O   | C1  | C2  | -110.1(3) |  | C10 | P   | C1  | C2  | -165.2(3) |
| P  | C1  | C2  | C3  | 141.6(4)  |  | C10 | C11 | C12 | C13 | 178.6(4)  |
| P  | C1  | C2  | C7  | -38.2(5)  |  | C10 | C11 | C16 | C15 | -178.2(4) |
| P  | C10 | C11 | C12 | 124.4(4)  |  | C10 | C17 | C18 | C19 | -176.5(4) |
| P  | C10 | C11 | C16 | -58.4(4)  |  | C10 | C17 | C22 | C21 | 176.6(4)  |
| P  | C10 | C17 | C18 | 126.1(3)  |  | C10 | C23 | C24 | C25 | -176.3(4) |
| P  | C10 | C17 | C22 | -52.3(4)  |  | C10 | C23 | C28 | C27 | 175.6(4)  |
| P  | C10 | C23 | C24 | -48.1(4)  |  | C11 | C10 | C17 | C18 | 1.3(5)    |
| P  | C10 | C23 | C28 | 134.1(3)  |  | C11 | C10 | C17 | C22 | -177.1(4) |
| O  | P   | C1  | C2  | 102.6(4)  |  | C11 | C10 | C23 | C24 | 75.9(4)   |
| O  | C1  | C2  | C3  | -150.5(4) |  | C11 | C10 | C23 | C28 | -101.8(4) |
| O  | C1  | C2  | C7  | 29.7(5)   |  | C11 | C12 | C13 | C14 | -1.8(7)   |
| C1 | C2  | C3  | C4  | -178.2(4) |  | C12 | C11 | C16 | C15 | -0.9(6)   |
| C1 | C2  | C7  | C6  | 177.7(4)  |  | C12 | C13 | C14 | C15 | 1.8(7)    |
| C2 | C3  | C4  | C5  | -0.9(6)   |  | C13 | C14 | C15 | C16 | -1.3(7)   |
| C2 | C3  | C4  | C8  | -178.6(4) |  | C14 | C15 | C16 | C11 | 0.9(6)    |
| C3 | C2  | C7  | C6  | -2.1(6)   |  | C16 | C11 | C12 | C13 | 1.3(6)    |

|     |    |    |    |           |  |     |     |     |     |           |
|-----|----|----|----|-----------|--|-----|-----|-----|-----|-----------|
| C3  | C4 | C5 | C6 | 0.7(7)    |  | C17 | C10 | C11 | C12 | -119.5(4) |
| C3  | C4 | C8 | F1 | -14.7(6)  |  | C17 | C10 | C11 | C16 | 57.7(5)   |
| C3  | C4 | C8 | F2 | -135.1(4) |  | C17 | C10 | C23 | C24 | -154.2(3) |
| C3  | C4 | C8 | F3 | 105.6(5)  |  | C17 | C10 | C23 | C28 | 28.1(5)   |
| C4  | C5 | C6 | C7 | -1.2(7)   |  | C17 | C18 | C19 | C20 | -1.2(6)   |
| C4  | C5 | C6 | C9 | -179.9(4) |  | C18 | C17 | C22 | C21 | -1.9(6)   |
| C5  | C4 | C8 | F1 | 167.5(4)  |  | C18 | C19 | C20 | C21 | 0.4(7)    |
| C5  | C4 | C8 | F2 | 47.1(6)   |  | C19 | C20 | C21 | C22 | -0.4(7)   |
| C5  | C4 | C8 | F3 | -72.2(6)  |  | C20 | C21 | C22 | C17 | 1.2(7)    |
| C5  | C6 | C7 | C2 | 1.9(7)    |  | C22 | C17 | C18 | C19 | 1.9(6)    |
| C5  | C6 | C9 | F4 | -56.9(6)  |  | C23 | C10 | C11 | C12 | 8.9(5)    |
| C5  | C6 | C9 | F5 | 60.5(6)   |  | C23 | C10 | C11 | C16 | -173.9(4) |
| C5  | C6 | C9 | F6 | -176.6(4) |  | C23 | C10 | C17 | C18 | -127.0(4) |
| C7  | C2 | C3 | C4 | 1.6(6)    |  | C23 | C10 | C17 | C22 | 54.6(5)   |
| C7  | C6 | C9 | F4 | 124.5(5)  |  | C23 | C24 | C25 | C26 | -0.6(6)   |
| C7  | C6 | C9 | F5 | -118.1(5) |  | C24 | C23 | C28 | C27 | -2.1(6)   |
| C7  | C6 | C9 | F6 | 4.8(7)    |  | C24 | C25 | C26 | C27 | 0.1(7)    |
| C8  | C4 | C5 | C6 | 178.5(4)  |  | C25 | C26 | C27 | C28 | -0.7(7)   |
| C9  | C6 | C7 | C2 | -179.5(4) |  | C26 | C27 | C28 | C23 | 1.7(7)    |
| C10 | P  | O  | C1 | -104.7(2) |  | C28 | C23 | C24 | C25 | 1.6(6)    |
| C10 | P  | C1 | O  | 92.2(2)   |  |     |     |     |     |           |

### 1.2.6 Synthesis of 4,4',5,5',6,6',7,7'-octachloro-2-triphenylmethyl-2,2'-spirobis[1,3,2-benzodioxaphosphole] 5

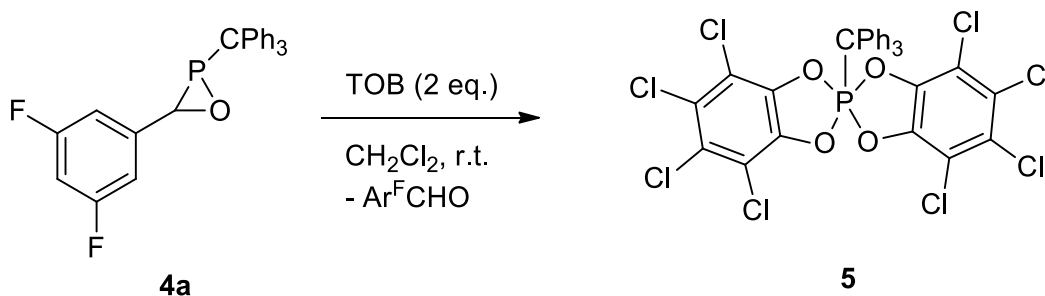

30.0 mg of **4a** (0.072 mmol, 1.00 eq) were dissolved in 1 mL of DCM and 17.7 mg of tetrachloro-*ortho*-benzoquinone (TOB) were dissolved in 0.5 mL of DCM. The TOB-solution was added to the oxaphosphirane-solution and the stirred for two hours at room temperature, and the solution turned from red to brown. Subsequently, after stirring for 1h each, four times 4.4 mg TOB (0.018 mmol, 0.25 eq) were added. The solvent was removed under reduced pressure ( $1 \times 10^{-2}$  mbar) and a brown residue was obtained. The residue was washed five times with 1 mL of Et<sub>2</sub>O and after drying under reduced pressure ( $1 \times 10^{-2}$  mbar) the product was obtained as a slightly yellow powder.

Yield: 17.8 mg (32%, 0.023 mmol).

Melting point: 185 °C.

IR (ATR Diamond): /  $\text{cm}^{-1}$  = 1698 (w,  $\nu(\text{C}=\text{C})$ ), 1623 (m,  $\nu(\text{C}=\text{C})$ ), 1595 (m,  $\nu(\text{C}=\text{C})$ ), 1118 (m,  $\nu(\text{P}-\text{O}-\text{C}^{\text{Ar}})$ ), 986 (m,  $\nu(\text{C}^{\text{Ar}}-\text{Cl})$ ), 747 (m,  $\delta(\text{C}^{\text{Ar}}-\text{H})_{\text{oop}}$ ), 718 (m,  $\delta(\text{C}^{\text{Ar}}-\text{H})_{\text{oop}}$ ), 699 (s,  $\delta(\text{C}^{\text{Ar}}-\text{H})_{\text{oop}}$ ), 681 (m,  $\delta(\text{C}^{\text{Ar}}-\text{H})_{\text{oop}}$ ), 669 (w,  $\delta(\text{C}^{\text{Ar}}-\text{H})_{\text{oop}}$ ).

MS (EI):  $m/z$  = 765.8 (0.6)  $[\text{M}]^{+\bullet}$ , 535.9 (0.4)  $[\text{M}-\text{C}_6\text{Cl}_4\text{O}]^{+\bullet}$ , 523.7 (2)  $[\text{M}-\text{CPh}_3]^{+\bullet}$ , 293.8 (4)  $[\text{M}-\text{C}_{25}\text{H}_{15}\text{Cl}_4\text{O}]^{+\bullet}$ , 243.1 (100)  $[\text{CPh}_3]^{+\bullet}$ , 165.0 (64)  $[\text{CPh}_2]^{+\bullet}$ .

HRMS (EI): calculated.: 761.8211 found.: 761.81925.

$^1\text{H-NMR}$  (300.13 MHz, 298.0 K,  $\text{CD}_2\text{Cl}_2$ ):  $\delta$  /ppm = 7.16 - 7.26 (m, 9H, *o*- and *p*- $\text{CPh}_3$ ), 7.46 - 7.53 (m, 6H, *m*- $\text{CPh}_3$ ).

$^{13}\text{C}\{^1\text{H}\}$ -NMR (75.48 MHz, 298.0 K,  $\text{CD}_2\text{Cl}_2$ ):  $\delta$  /ppm = 77.4 (d,  $^1J_{\text{P,C}} = 150.4$  Hz,  $\underline{\text{CPh}}_3$ ), 115.2 (d,  $^2J_{\text{P,C}} = 14.0$  Hz, *ipso*- $\text{CPh}_3$ ), 126.0 (s,  $\text{Aryl}^{\text{OP}}$ ), 127.7 (d,  $^5J_{\text{P,C}} = 2.8$  Hz, *p*- $\text{CPh}_3$ ), 128.3 (d,  $^3J_{\text{P,C}} = 1.9$  Hz, *o*- $\text{CPh}_3$ ), 130.8 (d,  $^4J_{\text{P,C}} = 9.4$  Hz, *m*- $\text{CPh}_3$ ), 140.7 (d,  $^xJ_{\text{P,C}} = 6.0$  Hz,  $\text{Aryl}^{\text{Cl}}$ ), 141.5 (d,  $^xJ_{\text{P,C}} = 2.0$  Hz,  $\text{Aryl}^{\text{Cl}}$ ).

$^{31}\text{P}\{^1\text{H}\}$ -NMR (121.51 MHz, 298.0 K,  $\text{CD}_2\text{Cl}_2$ ):  $\delta$  /ppm = 1.7.

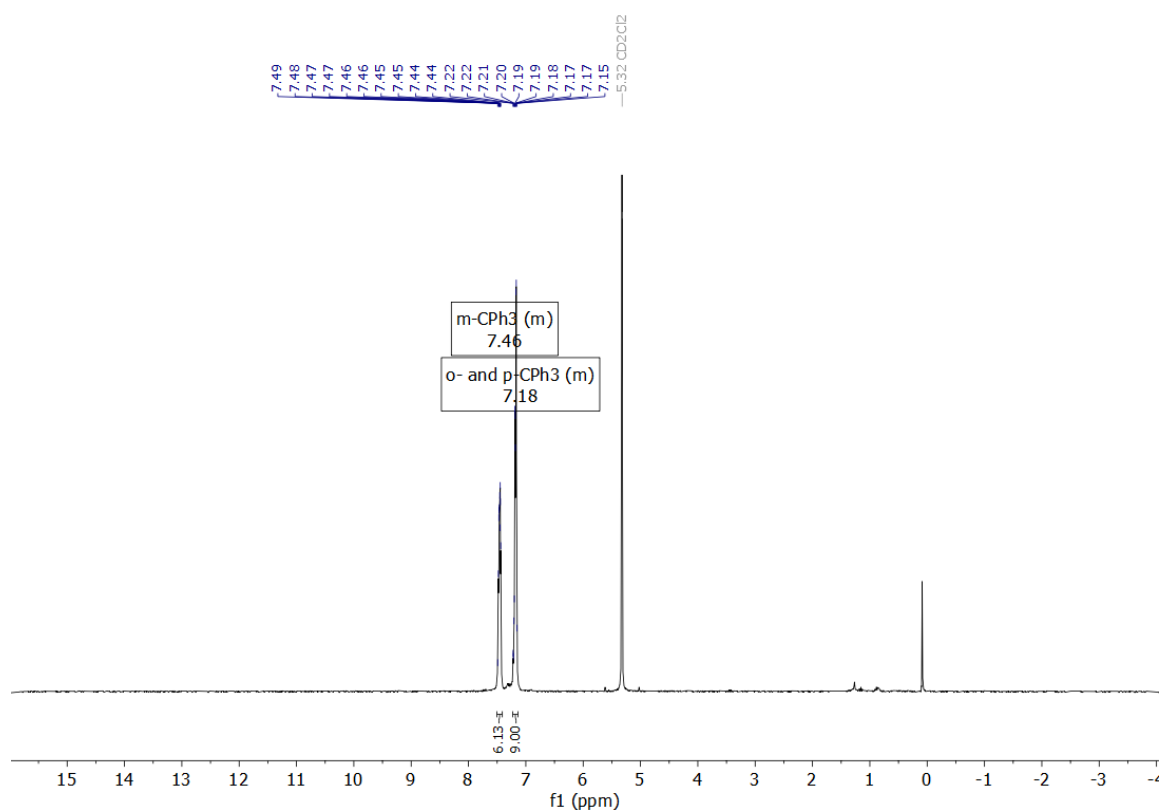

**Figure S 29:**  $^1\text{H-NMR}$  spectrum in  $\text{CD}_2\text{Cl}_2$ .

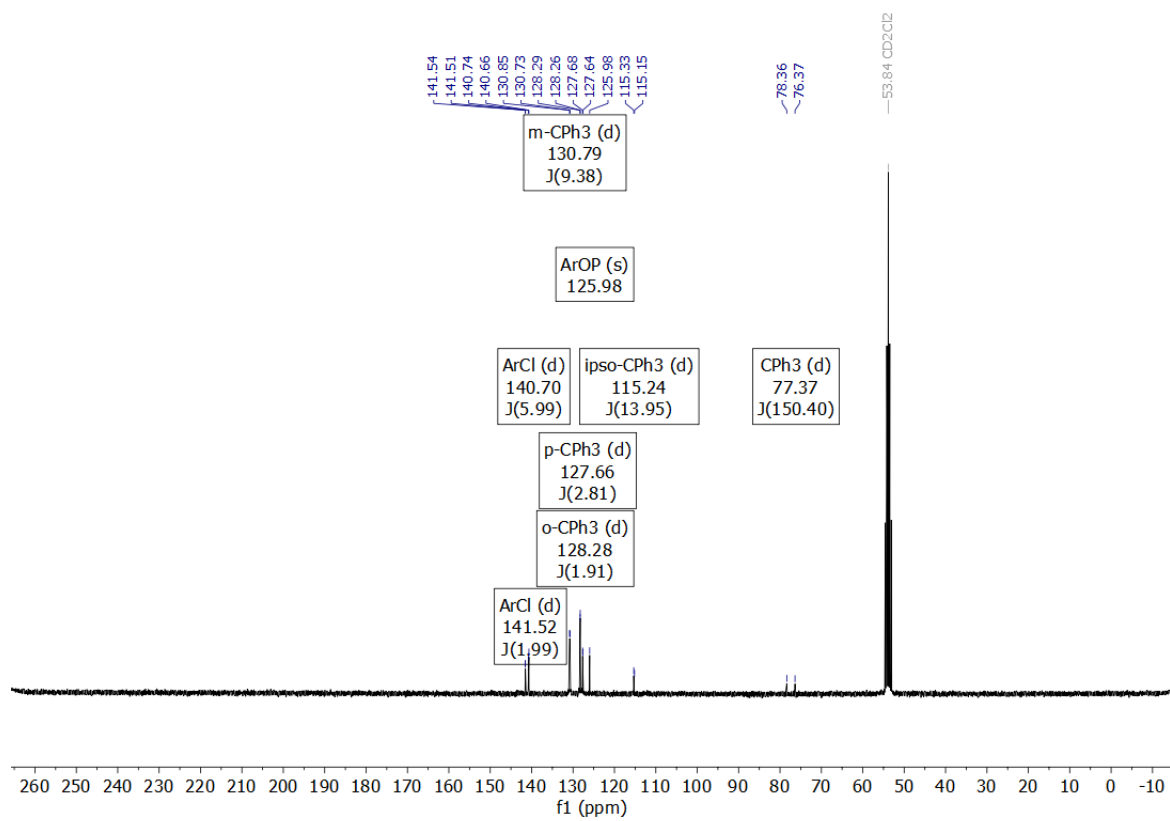

**Figure S 30:**  $^{13}\text{C}\{^1\text{H}\}$ -NMR spectrum in  $\text{CD}_2\text{Cl}_2$ .

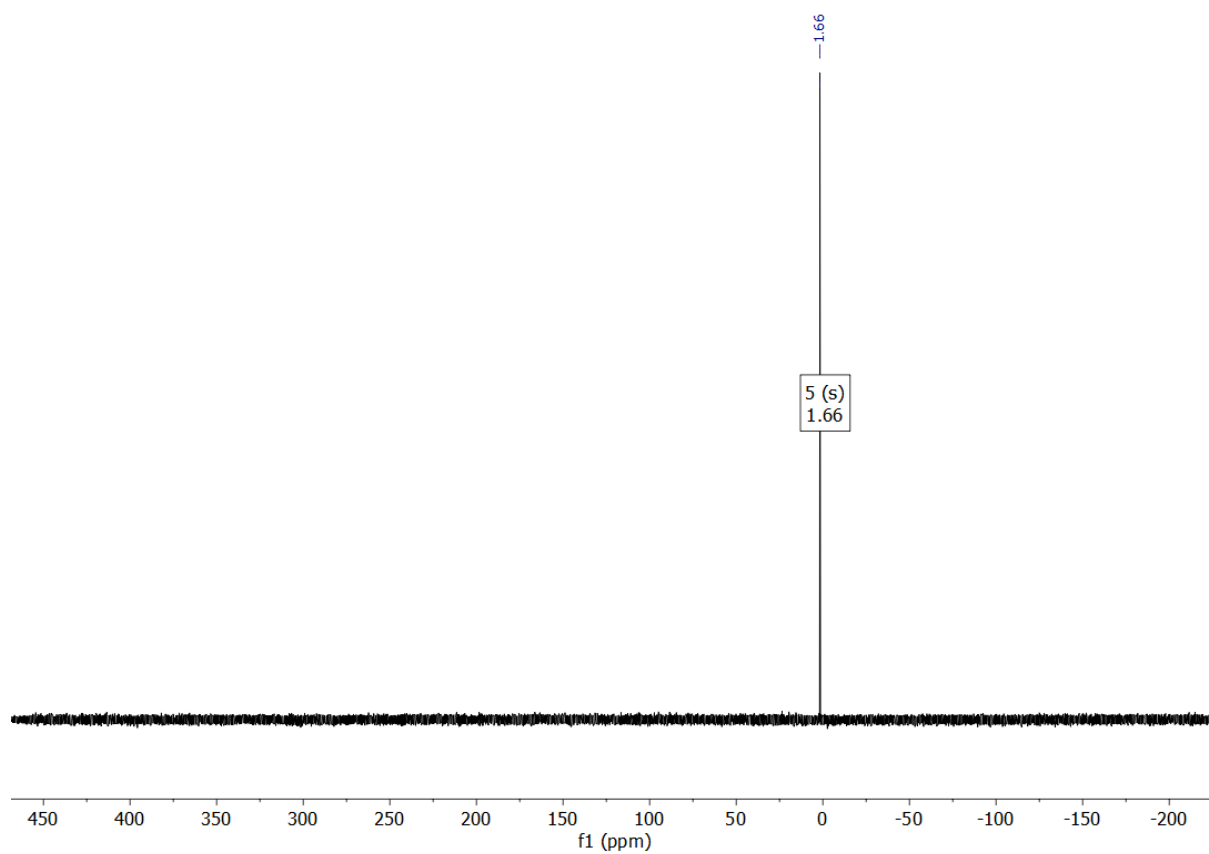

**Figure S 31:**  $^{31}\text{P}\{^1\text{H}\}$ -NMR spectrum in  $\text{CD}_2\text{Cl}_2$ .

500fh #47 RT: 3.19 AV: 1 NL: 6.06E7  
T: + c EI Full ms [ 49.50-1000.50]

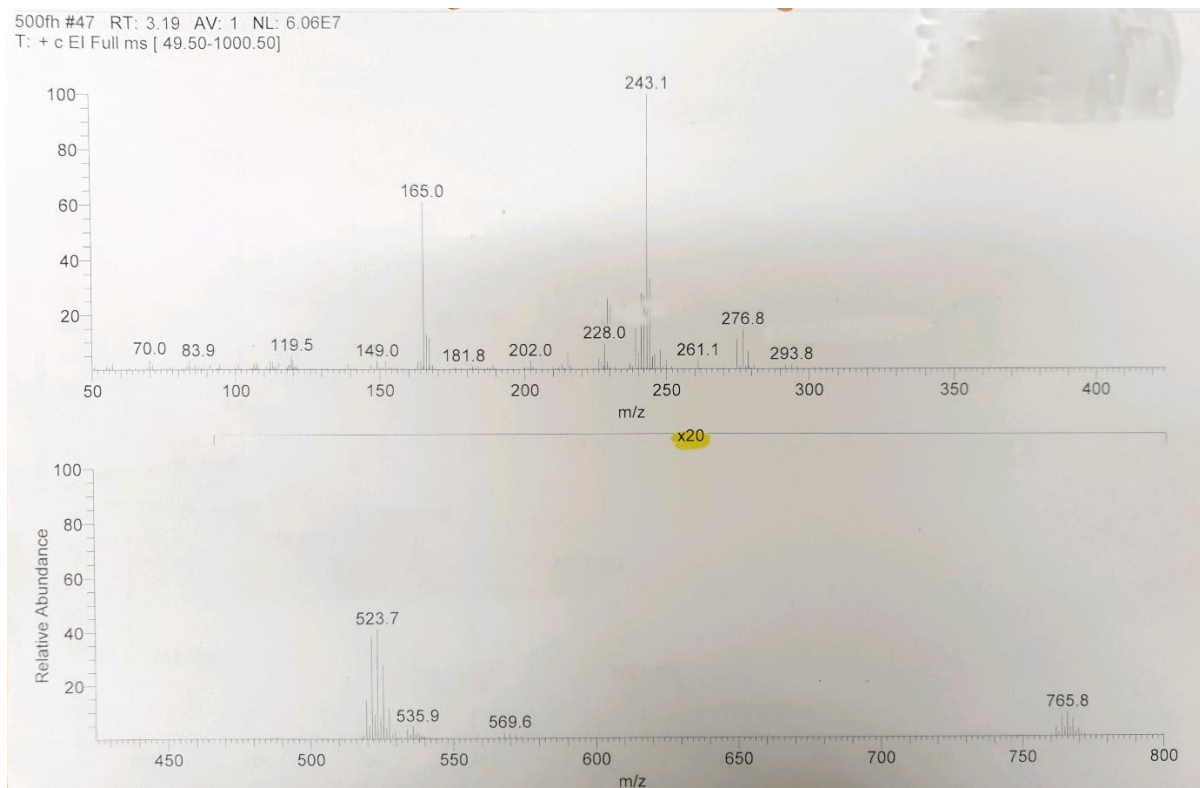

Figure S 32: MS spectrum (EI) of 5.

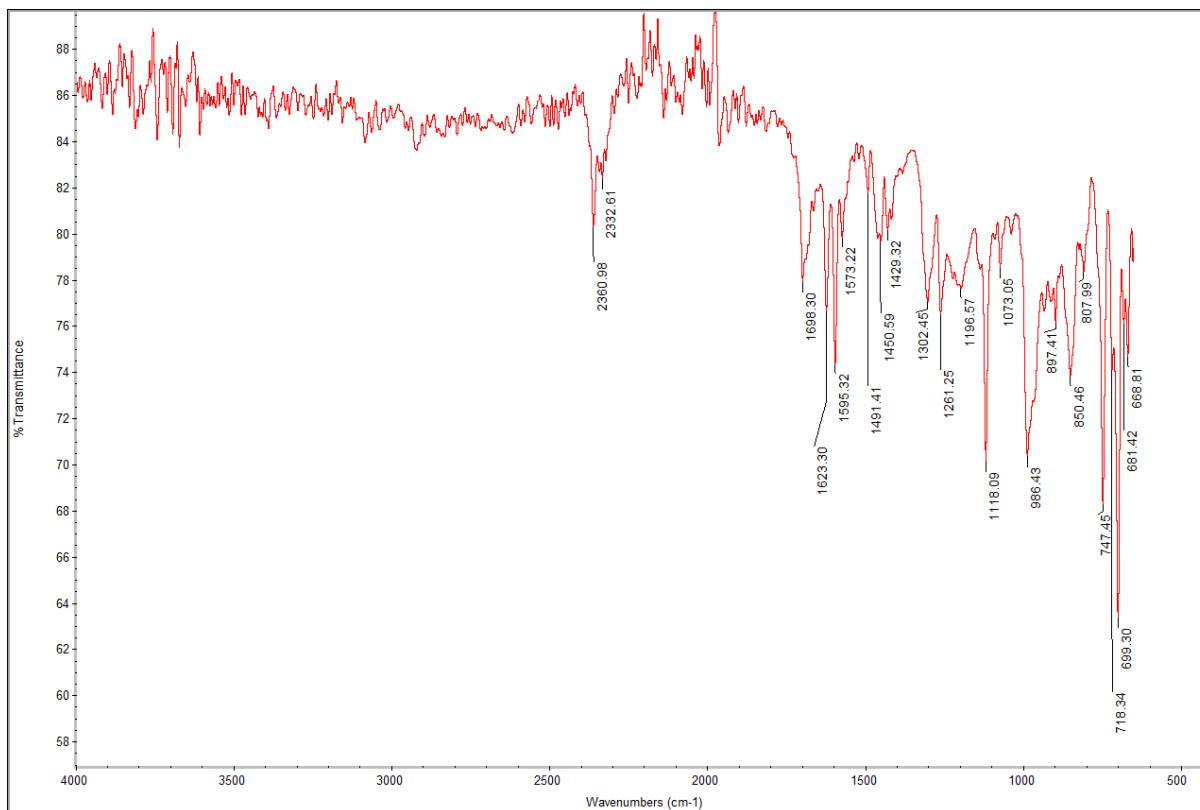

Figure S 33: IR spectrum of 5.

**1.2.7 Product mixture of {2-hydroxy-1-(3,5-difluorophenyl)methyl}(1-triphenylmethyl)-phosphaneoxide **8** (two diastereomers) and 1-triphenylmethylphosphaneoxide **9** in a ratio of 1.00 : 0.19 : 0.13.**

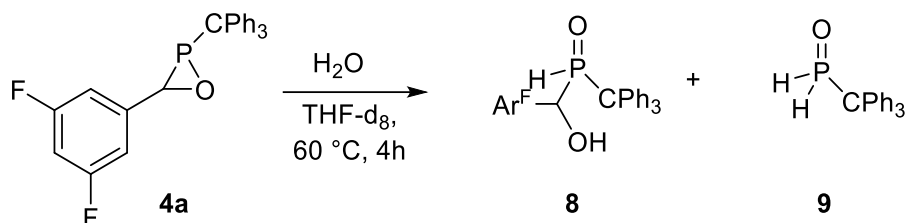

13.4 mg of **4a** (0.032 mmol, 1.00 eq) were dissolved in 0.5 mL THF- $d_8$  in a Young NMR tube. To the solution 0.01 mL of degassed, distilled water were added. After keeping the solution for 16h at room temperature, 2h at 40 °C, 4h at 60 °C and additionally 12 days at room temperature the reaction was completed. The solution was transferred to a Schlenk tube and the solvent was removed under reduced pressure ( $1 \times 10^{-2}$  mbar). The colorless residue was washed three times with 0.3 mL of *n*-pentane and a product mixture of **8** (two diastereomers) and **9** in a ratio of 1.00 : 0.19 : 0.13 was obtained as a colorless powder. The following analytical data refer to the product mixture.

IR (ATR diamond):  $\nu / \text{cm}^{-1} = 3744$  (w,  $\nu(\text{OH})$ ), 3693 (w,  $\nu(\text{OH})$ ), 2356 (m,  $\nu(\text{P-H})$ ), 1620 (m,  $\nu(\text{C=C})$ ), 1594 (m,  $\nu(\text{C=C})$ ), 1118 (m,  $\nu(\text{C-F})$ ), 899 (m,  $\delta(\text{C}^{\text{ArF}}\text{-H})_{\text{oop}}$ ), 851 (m,  $\delta(\text{C}^{\text{ArF}}\text{-H})_{\text{oop}}$ ), 769 (m,  $\delta(\text{C}^{\text{Ar}}\text{-H})_{\text{oop}}$ ), 745 (m,  $\delta(\text{C}^{\text{Ar}}\text{-H})_{\text{oop}}$ ), 700 (s,  $\delta(\text{C}^{\text{Ar}}\text{-H})_{\text{oop}}$ ), 681 (m,  $\delta(\text{C}^{\text{Ar}}\text{-H})_{\text{oop}}$ ).

**8** (major diastereomer):  $^1\text{H-NMR}$  (500.04 MHz, 298.0 K, THF- $d_8$ ):  $\delta / \text{ppm} = 2.86$  (s, 1H, OH), 4.34 (s, 1H, CH), 6.51 (m, *o*-Aryl $^{\text{F}}$ ), 6.61 (d,  $^1J_{\text{P,H}} = 481.3$  Hz, 1H, PH), 6.80 (m, *p*-Aryl $^{\text{F}}$ ), 7.23 – 7.37 (m, 15H, CPh $_3$ ).

$^{13}\text{C}\{^1\text{H}\}\text{-NMR}$  (125.75 MHz, 298.0 K, THF- $d_8$ ):  $\delta / \text{ppm} = 64.7$  (d,  $^1J_{\text{P,C}} = 50.2$  Hz, CPh $_3$ ), 69.2 (dt,  $^1J_{\text{P,C}} = 65.4$  Hz,  $^4J_{\text{F,C}} = 2.2$  Hz, CH), 103.7 (td,  $^2J_{\text{F,C}} = 25.8$  Hz,  $^5J_{\text{P,C}} = 2.9$  Hz, *p*-Aryl $^{\text{F}}$ ), 110.3 (m, *o*-Aryl $^{\text{F}}$ ), 127.4 (d,  $^5J_{\text{P,C}} = 1.9$  Hz, *p*-CPh $_3$ ), 128.3 (d,  $^3J_{\text{P,C}} = 1.4$  Hz, *o*-CPh $_3$ ), 130.6 (d,  $^4J_{\text{P,C}} = 6.1$  Hz, *m*-CPh $_3$ ), 142.1 (d,  $^2J_{\text{P,C}} = 1.4$  Hz *ipso*-CPh $_3$ ), 146.4 (td,  $^3J_{\text{F,C}} = 8.5$  Hz,  $^2J_{\text{P,C}} = 2.2$  Hz, *ipso*-Aryl $^{\text{F}}$ ), 164.1 (ddd,  $^1J_{\text{F,C}} = 248.3$  Hz,  $^2J_{\text{F,C}} = 12.8$  Hz,  $^4J_{\text{P,C}} = 2.7$  Hz, *m*-Aryl $^{\text{F}}$ ).

$^{31}\text{P-NMR}$  (202.44 MHz, 298.0 K, THF- $d_8$ ):  $\delta / \text{ppm} = 50.3$  (d,  $^1J_{\text{P,H}} = 481.3$  Hz).

**8'** (minor diastereomer):  $^1\text{H-NMR}$  (500.04 MHz, 298.0 K, THF- $d_8$ ):  $\delta / \text{ppm} = 2.88$  (s, 1H, OH), 4.55 (s, 1H, CH), 6.51 (m, *o*-Aryl $^{\text{F}}$ ), 6.80 (m, *p*-Aryl $^{\text{F}}$ ), 7.23 – 7.37 (m, 15H, CPh $_3$ ), 7.37 (dd,  $^1J_{\text{P,H}} = 481.3$  Hz,  $^3J_{\text{H,H}} = 1.2$  Hz, 1H, PH).

$^{13}\text{C}\{^1\text{H}\}\text{-NMR}$  (125.75 MHz, 298.0 K, THF- $d_8$ ):  $\delta / \text{ppm} = 63.4$  (d,  $^1J_{\text{P,C}} = 50.5$  Hz, CPh $_3$ ), 72.3 (dt,  $^1J_{\text{P,C}} = 73.6$  Hz,  $^4J_{\text{F,C}} = 2.0$  Hz, CH), 103.7 (td,  $^2J_{\text{F,C}} = 25.8$  Hz,  $^5J_{\text{P,C}} = 2.9$  Hz, *p*-Aryl $^{\text{F}}$ ), 112.9 (m, *o*-Aryl $^{\text{F}}$ ), 128.2 – 131.8 (m, CPh $_3$ ), 142.5 (d,  $^2J_{\text{P,C}} = 2.0$  Hz, *ipso*-CPh $_3$ ), 144.1 – 144.2 (m, *ipso*-Aryl $^{\text{F}}$ ), 164.3 (dd,  $^1J_{\text{F,C}} = 249.9$  Hz,  $^2J_{\text{F,C}} = 11.8$  Hz, *m*-Aryl $^{\text{F}}$ ).

$^{31}\text{P-NMR}$  (202.44 MHz, 298.0 K, THF- $d_8$ ):  $\delta / \text{ppm} = 49.3$  (d,  $^1J_{\text{P,H}} = 481.8$  Hz).

**9**:  $^1\text{H-NMR}$  (500.04 MHz, 298.0 K, THF- $d_8$ ):  $\delta / \text{ppm} = 7.05$  (d,  $^1J_{\text{P,H}} = 480.5$  Hz, 2H, PH), 7.28 – 7.37 (m, 15H, CPh $_3$ ).

$^{13}\text{C}\{^1\text{H}\}\text{-NMR}$  (125.75 MHz, 298.0 K, THF- $d_8$ ):  $\delta / \text{ppm} = 63.6$  (d,  $^1J_{\text{P,C}} = 50.2$  Hz, CPh $_3$ ), 128.2 – 131.8 (m, CPh $_3$ ), 141.7 (s, *ipso*-CPh $_3$ ).



$^{31}\text{P}$ -NMR (202.44 MHz, 298.0 K, THF- $d_8$ ):  $\delta$  /ppm = 19.9 (t,  $^1J_{\text{P,H}} = 480.8$  Hz).

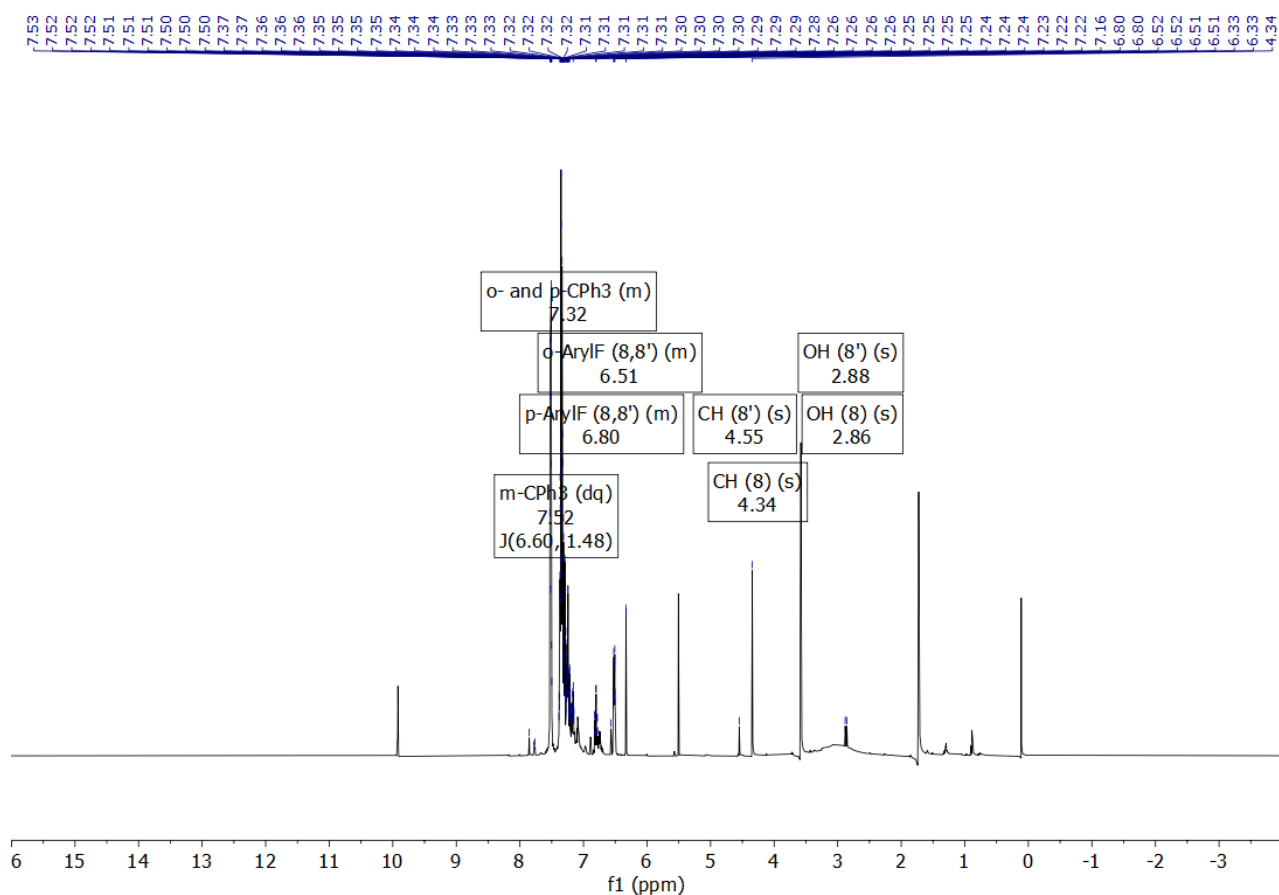

Figure S 34:  $^1\text{H}$ -NMR spectrum in THF- $d_8$ .

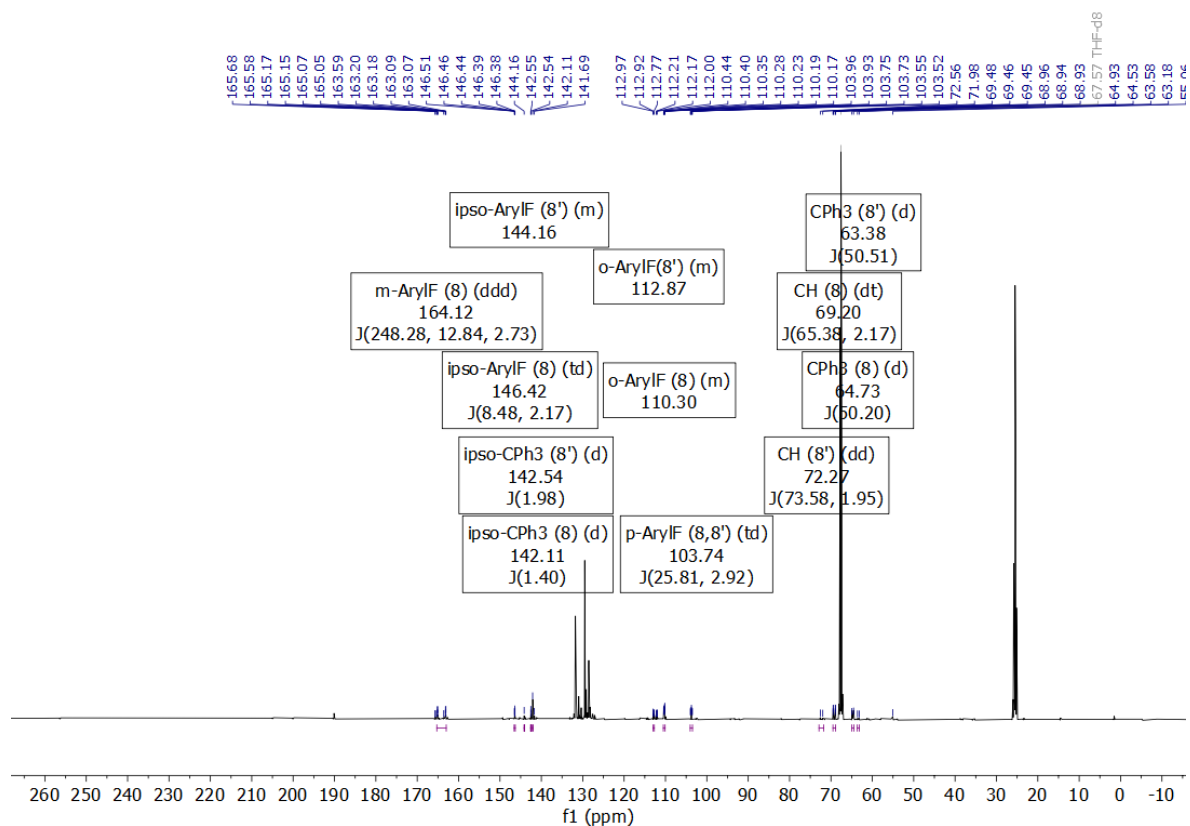

Figure S 35:  $^{13}\text{C}\{^1\text{H}\}$ -NMR spectrum in THF- $d_8$ .

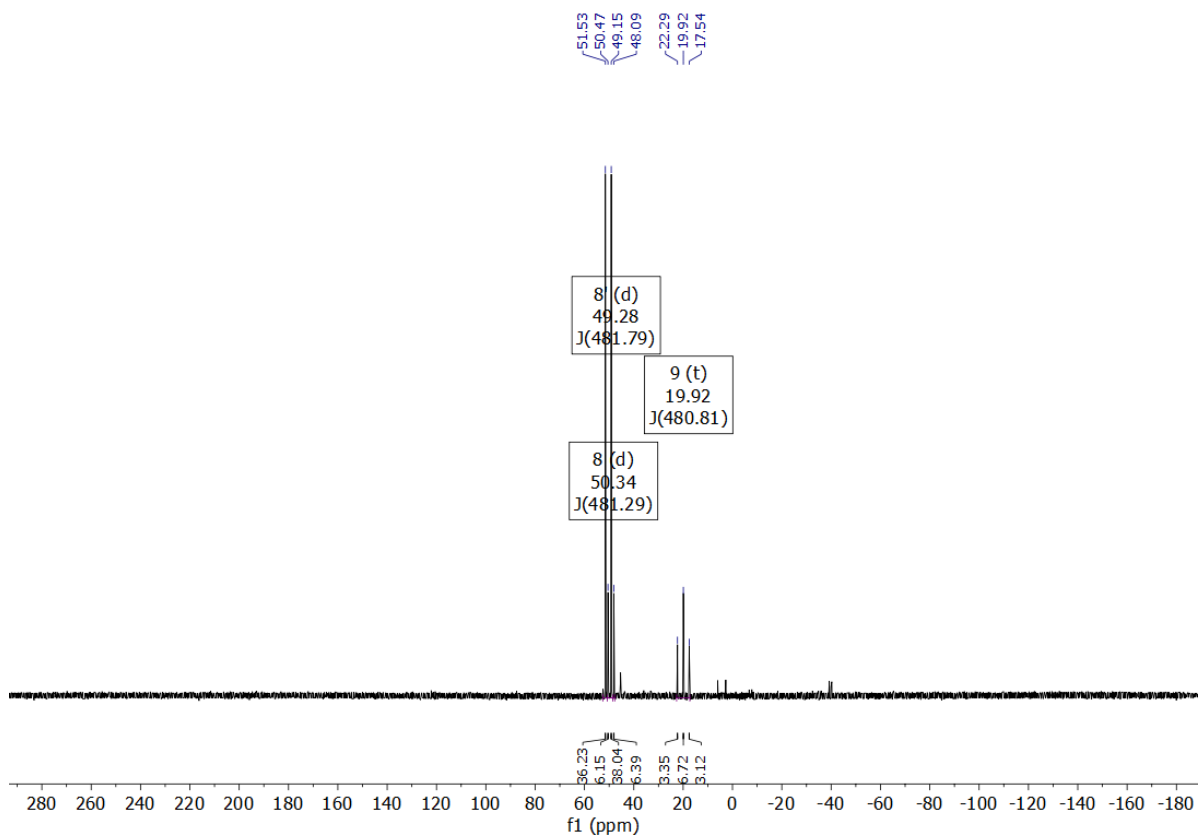

**Figure S 36:**  $^{31}\text{P}$ -NMR spectrum in  $\text{THF-d}_8$ .

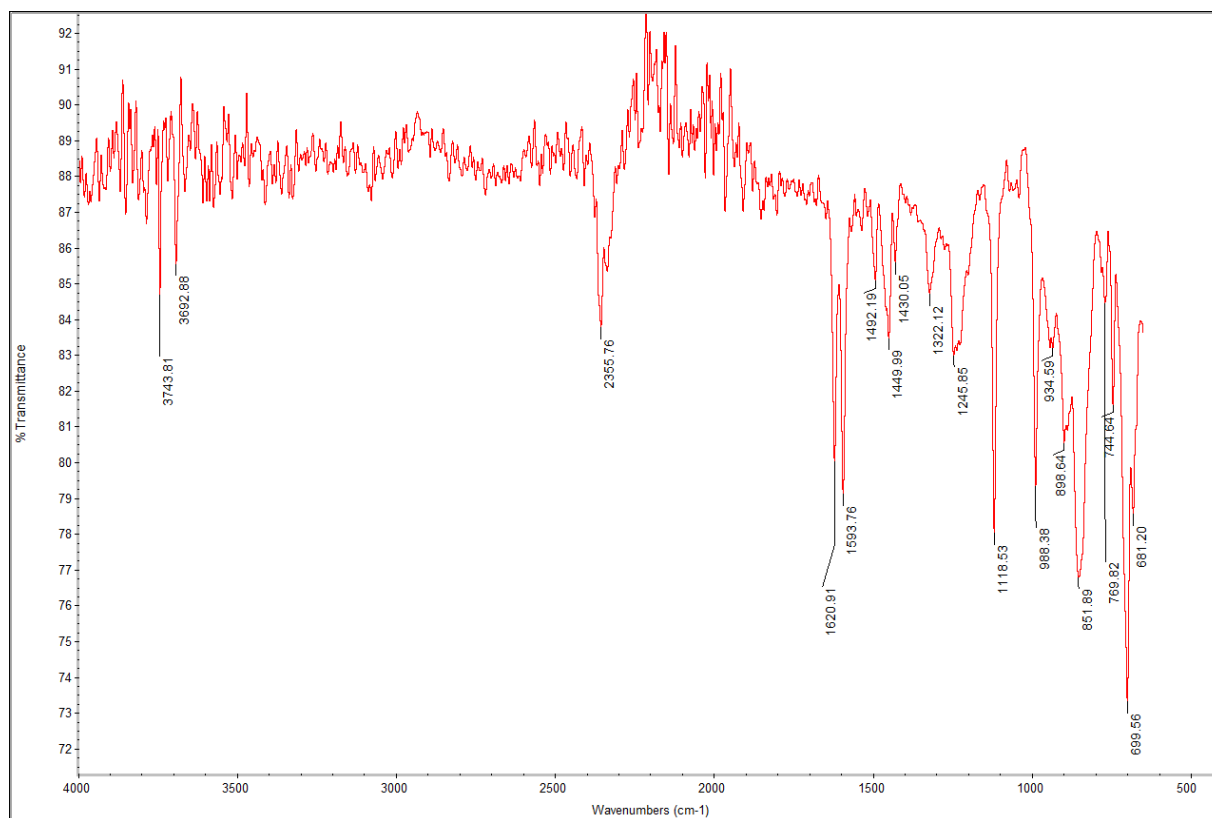

**Figure S 37:** IR spectrum of the product mixture **8** & **9**.

## Molecular structure of **8**

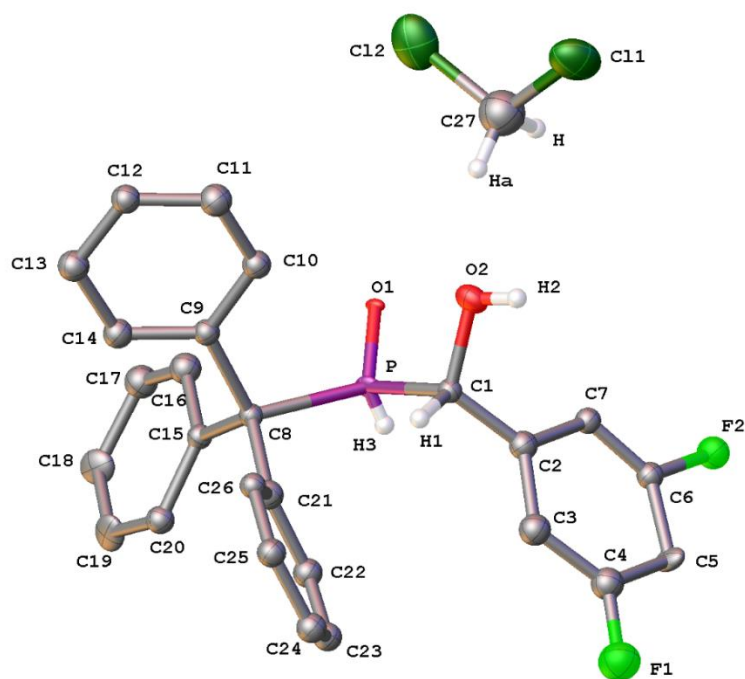

**Figure S 38:** Molecular structure of **8** of the (1*R*,2*S*)-diastereomer with cocrystallized CH<sub>2</sub>Cl<sub>2</sub> in the single crystal (50% probability level). The structural not relevant hydrogen atoms are omitted for clarity.

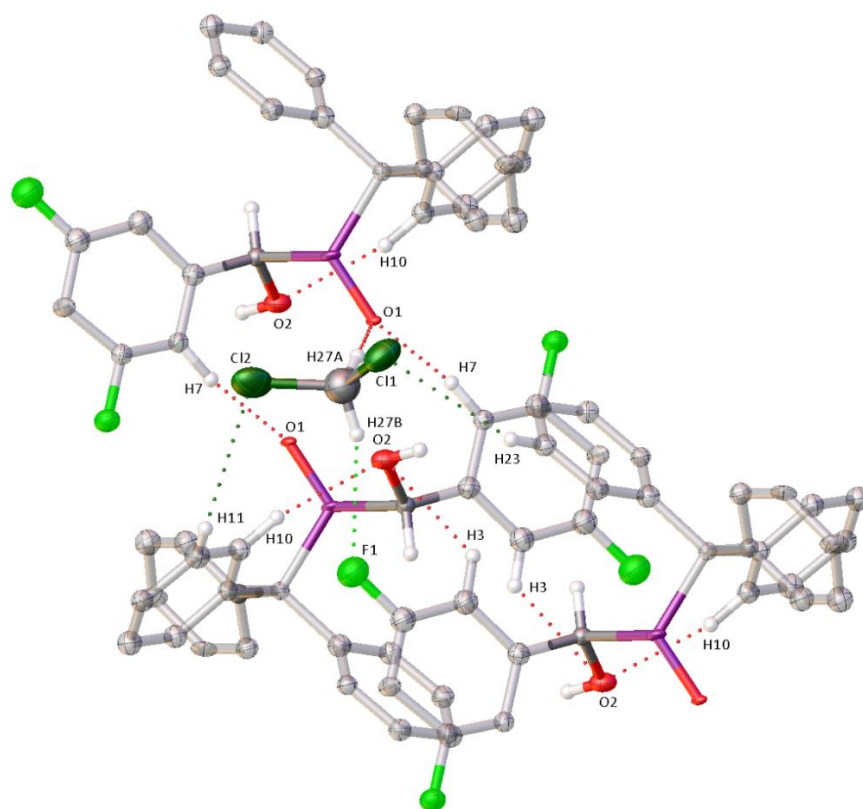

**Figure S 39:** Secondary structural motif of the molecular structure of three molecules of **8** with cocrystallized CH<sub>2</sub>Cl<sub>2</sub> in the single crystal (50% probability level). The structural not relevant hydrogen atoms are omitted for clarity.

## Bond lengths in Å

|     |     |           |  |     |     |         |
|-----|-----|-----------|--|-----|-----|---------|
| Cl1 | C27 | 1.82(2)   |  | C9  | C10 | 1.42(2) |
| Cl2 | C27 | 1.74(2)   |  | C9  | C14 | 1.34(2) |
| P   | O1  | 1.491(8)  |  | C10 | C11 | 1.34(2) |
| P   | C1  | 1.892(14) |  | C11 | C12 | 1.36(2) |
| P   | C8  | 1.891(13) |  | C12 | C13 | 1.41(2) |
| F1  | C4  | 1.336(19) |  | C13 | C14 | 1.41(2) |
| F2  | C6  | 1.401(15) |  | C15 | C16 | 1.42(2) |
| O2  | C1  | 1.464(17) |  | C15 | C20 | 1.40(2) |
| C1  | C2  | 1.42(2)   |  | C16 | C17 | 1.31(2) |
| C2  | C3  | 1.43(2)   |  | C17 | C18 | 1.47(2) |
| C2  | C7  | 1.421(19) |  | C18 | C19 | 1.41(2) |
| C3  | C4  | 1.41(2)   |  | C19 | C20 | 1.40(2) |
| C4  | C5  | 1.41(2)   |  | C21 | C22 | 1.39(2) |
| C5  | C6  | 1.44(2)   |  | C21 | C26 | 1.44(2) |
| C6  | C7  | 1.29(2)   |  | C22 | C23 | 1.32(2) |
| C8  | C9  | 1.598(19) |  | C23 | C24 | 1.43(2) |
| C8  | C15 | 1.515(19) |  | C24 | C25 | 1.35(2) |
| C8  | C21 | 1.557(19) |  | C25 | C26 | 1.34(2) |

## Bond angles in °

|     |     |     |           |  |     |     |     |           |
|-----|-----|-----|-----------|--|-----|-----|-----|-----------|
| Cl2 | C27 | Cl1 | 110.0(13) |  | C10 | C9  | C8  | 122.9(12) |
| O1  | P   | C1  | 113.8(5)  |  | C14 | C9  | C8  | 116.3(13) |
| O1  | P   | C8  | 115.0(5)  |  | C14 | C9  | C10 | 120.6(14) |
| C8  | P   | C1  | 112.8(6)  |  | C11 | C10 | C9  | 120.3(14) |
| O2  | C1  | P   | 107.4(9)  |  | C10 | C11 | C12 | 119.9(15) |
| C2  | C1  | P   | 110.2(10) |  | C11 | C12 | C13 | 121.4(15) |
| C2  | C1  | O2  | 115.6(11) |  | C14 | C13 | C12 | 117.6(14) |
| C1  | C2  | C3  | 120.0(12) |  | C9  | C14 | C13 | 120.0(15) |
| C7  | C2  | C1  | 123.3(13) |  | C16 | C15 | C8  | 118.8(13) |
| C7  | C2  | C3  | 116.7(13) |  | C20 | C15 | C8  | 121.6(12) |
| C4  | C3  | C2  | 119.8(13) |  | C20 | C15 | C16 | 119.5(14) |
| F1  | C4  | C3  | 120.0(13) |  | C17 | C16 | C15 | 122.3(16) |
| F1  | C4  | C5  | 117.0(13) |  | C16 | C17 | C18 | 121.7(15) |
| C5  | C4  | C3  | 123.0(14) |  | C19 | C18 | C17 | 114.9(16) |
| C4  | C5  | C6  | 112.6(12) |  | C20 | C19 | C18 | 123.6(16) |
| F2  | C6  | C5  | 111.7(11) |  | C15 | C20 | C19 | 117.9(14) |
| C7  | C6  | F2  | 121.0(12) |  | C22 | C21 | C8  | 121.5(13) |
| C7  | C6  | C5  | 127.1(12) |  | C22 | C21 | C26 | 117.8(13) |
| C6  | C7  | C2  | 120.4(13) |  | C26 | C21 | C8  | 120.4(13) |
| C9  | C8  | P   | 110.1(9)  |  | C23 | C22 | C21 | 120.0(14) |
| C15 | C8  | P   | 106.8(8)  |  | C22 | C23 | C24 | 122.2(14) |
| C15 | C8  | C9  | 109.5(11) |  | C25 | C24 | C23 | 117.7(14) |
| C15 | C8  | C21 | 115.9(12) |  | C26 | C25 | C24 | 121.8(14) |
| C21 | C8  | P   | 101.3(9)  |  | C25 | C26 | C21 | 120.3(13) |
| C21 | C8  | C9  | 112.8(11) |  |     |     |     |           |

**1.2.8 Product mixture of {1-deuterooxide-1-(3,5-difluorophenyl)methyl}(1-triphenylmethyl)-phosphaneoxide **10** (two diastereomers) and 1,1-dideuterio-1-triphenylmethyl-phosphaneoxide **11** in a ratio of 1.00 : 0.26 : 0.27**

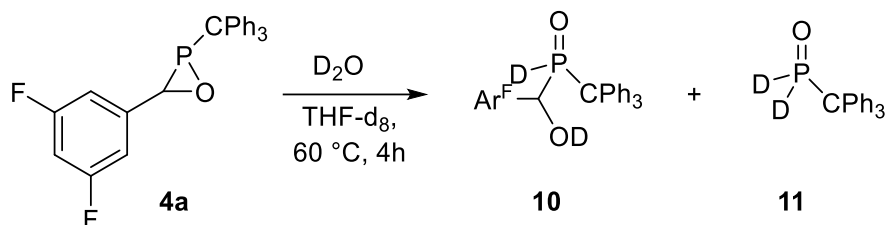

15.2 mg of **4a** (0.032 mmol, 1.00 eq) were dissolved in 0.5 mL THF- $d_8$  in a Young NMR tube. To the solution three drops of  $D_2O$  were added and the solution was heated for 4h at 60 °C. The solution was transferred to a Schlenk tube and the solvent was removed under reduced pressure ( $1 \times 10^{-2}$  mbar). The colorless residue was washed three times with 0.3 mL of *n*-pentane and a product mixture of **10** (two diastereomers) and **11** in a ratio of 1.00 : 0.26 : 0.27 was obtained as a colorless powder. The following analytical data refers to the product mixture.

IR (ATR Diamond): /  $cm^{-1}$  = 2165 (w,  $\nu(P-D)$ ), 1620 (m,  $\nu(C=C)$ ), 1594 (m,  $\nu(C=C)$ ), 1120 (m,  $\nu(C=C)$ ), 844 (m,  $\delta(C^{ArF}-H)_{oop}$ ), 800 (m,  $\delta(C^{Ar}-H)_{oop}$ ), 742 (m,  $\delta(C^{Ar}-H)_{oop}$ ), 700 (s,  $\delta(C^{Ar}-H)_{oop}$ ).

**10**: Isomer 1 (major, 80%):  $^1H$ -NMR (500.04 MHz, 298.0 K, THF- $d_8$ ):  $\delta$  /ppm = 2.87 (s, 1H, OH), 4.30 (s, 1H, CH), 6.58 (m, *o*-Aryl $^F$ ), 6.80 (m, *p*- Aryl $^F$ ), 7.23 – 7.55 (m, 15H, CPh $_3$ ).

$^{31}P$ -NMR (121.51 MHz, 298.0 K, THF- $d_8$ ):  $\delta$  /ppm = 50.2 (t\*,  $^1J_{P,D} = 73.7$  Hz).

**10'**: Isomer 2 (minor, 20%):  $^1H$ -NMR (500.04 MHz, 298.0 K, THF- $d_8$ ):  $\delta$  /ppm = 2.91 (s, 1H, OH), 4.61 (s, 1H, CH), 6.58 (m, *o*- Aryl $^F$ ), 6.72(m, *p*- Aryl $^F$ ), 7.23 – 7.55 (m, 15H, CPh $_3$ ).

$^{31}P$ -NMR (121.51 MHz, 298.0 K, THF- $d_8$ ):  $\delta$  /ppm = 49.5 (t\*,  $^1J_{P,D} = 74.0$  Hz).

**11**:  $^1H$ -NMR (500.04 MHz, 298.0 K, THF- $d_8$ ):  $\delta$  /ppm = 7.23 – 7.55 (m, 15H, CPh $_3$ ).

$^{31}P$ -NMR (121.51 MHz, 298.0 K, THF- $d_8$ ):  $\delta$  /ppm = 19.5 (quint\*,  $^1J_{P,D} = 74.4$  Hz).

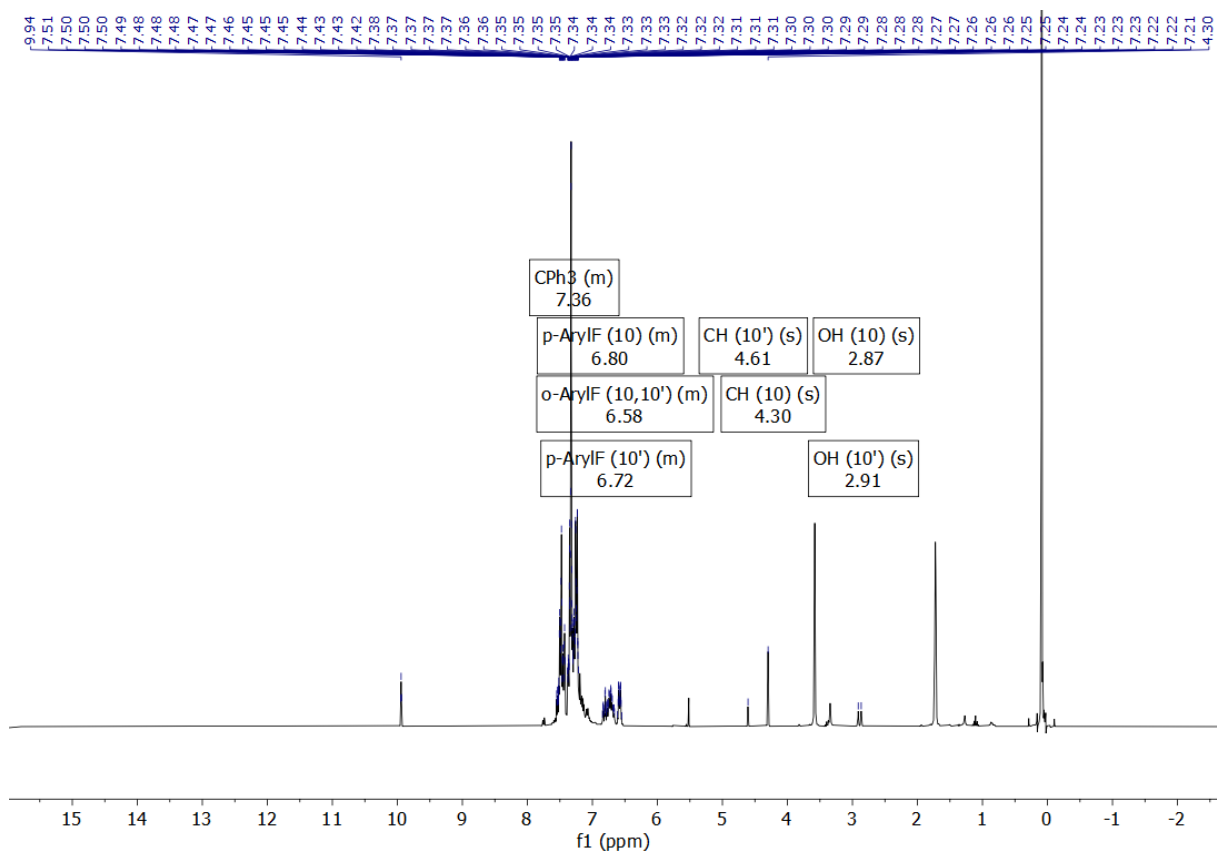

Figure S 40:  $^1\text{H}$ -NMR spectrum in  $\text{THF-d}_8$ .

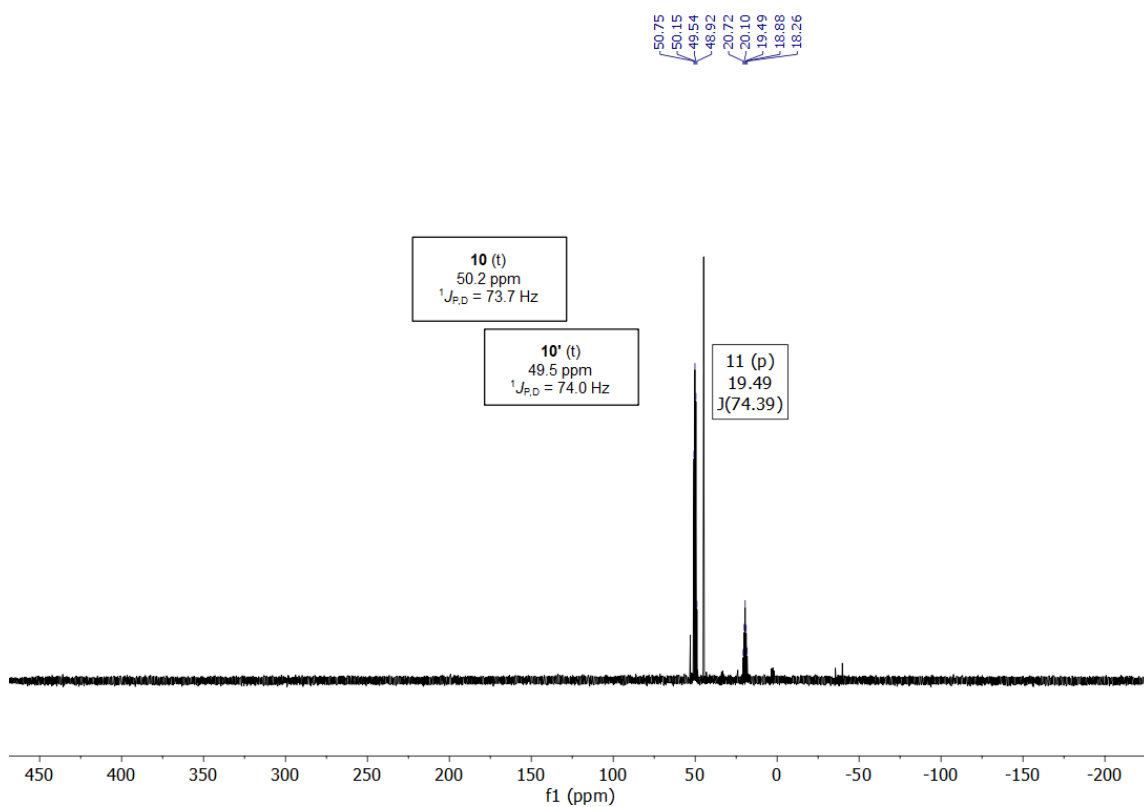

Figure S 41:  $^{31}\text{P}\{^1\text{H}\}$ -NMR spectrum in  $\text{THF-d}_8$ .

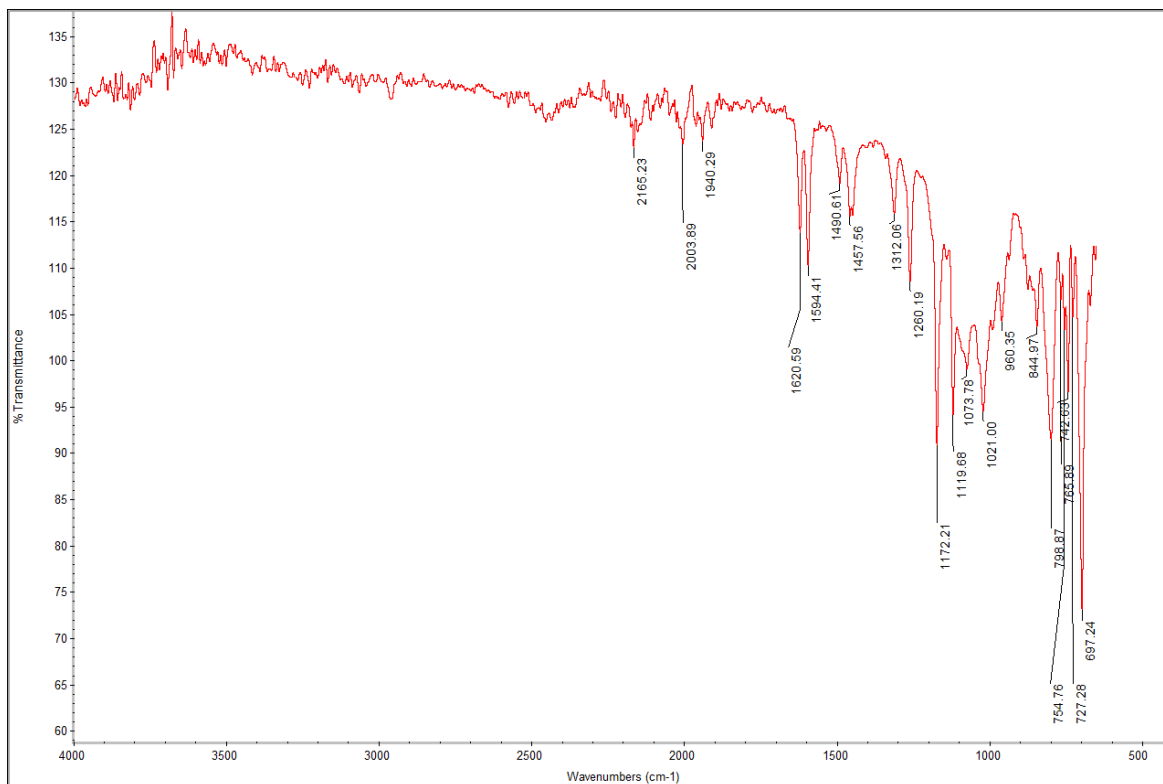

**Figure S 42:** IR spectrum of the product mixture **10** & **11**.

### Molecular structure of **10**

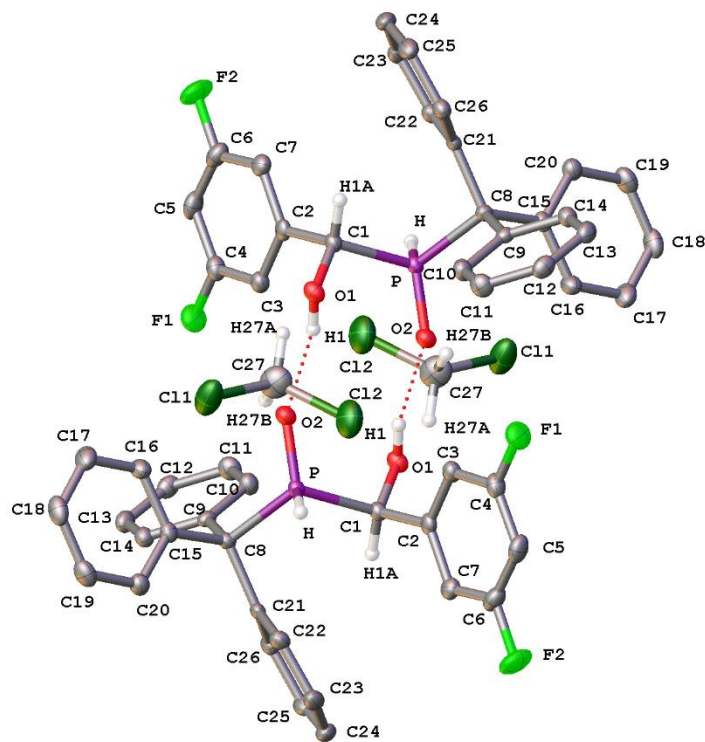

**Figure S 43:** D-bridging dimer of the molecular structure of **10** (enantiomers *1R,2S* and *1S,2R*)-diastereomer with cocrystallized  $\text{CH}_2\text{Cl}_2$  in the single crystal (50% probability level). The structural not relevant hydrogen atoms are omitted for clarity.

## Bond lengths in Å

|     |     |            |  |     |     |          |
|-----|-----|------------|--|-----|-----|----------|
| Cl1 | C27 | 1.745(2)   |  | C9  | C10 | 1.391(2) |
| Cl2 | C27 | 1.756(3)   |  | C9  | C14 | 1.396(2) |
| P   | O1  | 1.4895(12) |  | C10 | C11 | 1.386(3) |
| P   | C1  | 1.8774(18) |  | C11 | C12 | 1.380(3) |
| P   | C8  | 1.8746(17) |  | C12 | C13 | 1.385(3) |
| F1  | C4  | 1.352(2)   |  | C13 | C14 | 1.388(3) |
| F2  | C6  | 1.359(2)   |  | C15 | C16 | 1.399(2) |
| O2  | C1  | 1.413(2)   |  | C15 | C20 | 1.395(2) |
| C1  | C2  | 1.514(2)   |  | C16 | C17 | 1.387(3) |
| C2  | C3  | 1.393(3)   |  | C17 | C18 | 1.386(3) |
| C2  | C7  | 1.393(2)   |  | C18 | C19 | 1.382(3) |
| C3  | C4  | 1.375(3)   |  | C19 | C20 | 1.389(3) |
| C4  | C5  | 1.382(3)   |  | C21 | C22 | 1.400(2) |
| C5  | C6  | 1.373(3)   |  | C21 | C26 | 1.396(3) |
| C6  | C7  | 1.377(3)   |  | C22 | C23 | 1.389(3) |
| C8  | C9  | 1.534(2)   |  | C23 | C24 | 1.382(3) |
| C8  | C15 | 1.537(2)   |  | C24 | C25 | 1.382(3) |
| C8  | C21 | 1.541(2)   |  | C25 | C26 | 1.389(3) |

## Bond angles in °

|     |     |     |            |  |     |     |     |            |
|-----|-----|-----|------------|--|-----|-----|-----|------------|
| Cl1 | C27 | Cl2 | 111.99(12) |  | C10 | C9  | C8  | 122.75(15) |
| O1  | P   | C1  | 111.08(7)  |  | C10 | C9  | C14 | 118.40(16) |
| O1  | P   | C8  | 116.34(7)  |  | C14 | C9  | C8  | 118.77(15) |
| C8  | P   | C1  | 111.41(8)  |  | C11 | C10 | C9  | 120.77(16) |
| O2  | C1  | P   | 109.91(11) |  | C12 | C11 | C10 | 120.34(17) |
| O2  | C1  | C2  | 113.77(14) |  | C11 | C12 | C13 | 119.72(17) |
| C2  | C1  | P   | 109.32(12) |  | C12 | C13 | C14 | 120.08(17) |
| C3  | C2  | C1  | 120.00(15) |  | C13 | C14 | C9  | 120.68(17) |
| C7  | C2  | C1  | 119.52(16) |  | C16 | C15 | C8  | 118.56(15) |
| C7  | C2  | C3  | 120.47(16) |  | C20 | C15 | C8  | 123.48(15) |
| C4  | C3  | C2  | 118.17(16) |  | C20 | C15 | C16 | 117.83(17) |
| F1  | C4  | C3  | 119.05(16) |  | C17 | C16 | C15 | 121.17(17) |
| F1  | C4  | C5  | 117.54(16) |  | C18 | C17 | C16 | 120.26(18) |
| C3  | C4  | C5  | 123.42(18) |  | C19 | C18 | C17 | 119.18(19) |
| C6  | C5  | C4  | 116.21(17) |  | C18 | C19 | C20 | 120.80(18) |
| F2  | C6  | C5  | 117.79(17) |  | C19 | C20 | C15 | 120.74(17) |
| F2  | C6  | C7  | 118.52(18) |  | C22 | C21 | C8  | 120.02(16) |
| C5  | C6  | C7  | 123.69(17) |  | C26 | C21 | C8  | 121.56(15) |
| C6  | C7  | C2  | 118.04(18) |  | C26 | C21 | C22 | 118.19(15) |
| C9  | C8  | P   | 111.70(11) |  | C23 | C22 | C21 | 120.69(18) |
| C9  | C8  | C15 | 109.71(13) |  | C24 | C23 | C22 | 120.30(18) |
| C9  | C8  | C21 | 111.51(14) |  | C23 | C24 | C25 | 119.71(17) |
| C15 | C8  | P   | 105.89(11) |  | C24 | C25 | C26 | 120.32(19) |
| C15 | C8  | C21 | 114.95(14) |  | C25 | C26 | C21 | 120.78(18) |
| C21 | C8  | P   | 102.78(11) |  |     |     |     |            |



### 1.2.9 Synthesis of chloro(triphenylmethyl)phosphane 16

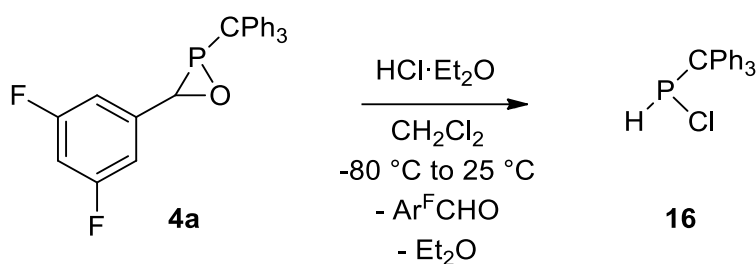

22.1 mg of **4a** (0.053 mmol, 1.00 eq) and 0.026 mL HCl·Et<sub>2</sub>O (0.053 mmol, 1.00 eq, 2M in Et<sub>2</sub>O) were each dissolved in 3 mL of DCM and cooled to -80 °C. The oxaphosphirane solution was transferred with a transfer cannula to the HCl-solution and the solution was warmed up to room temperature. After stirring for 22h at room temperature the solvent was removed under reduced pressure ( $1 \times 10^{-2}$  mbar) and a colorless residue was obtained. The residue was washed three times with 0.5 mL of *n*-pentane at -30 °C. After drying under reduced pressure ( $1 \times 10^{-2}$  mbar) the product was obtained as a colorless powder.

Yield: 12.8 mg (0.041 mmol, 78 %) (Lit.: 11.1 g (65.9 %)).

Melting point: 122 °C.

IR (ATR diamond): / cm<sup>-1</sup> = 2310 (w, ν(P-H)).

<sup>1</sup>H-NMR (500.04 MHz, 298.0 K, CDCl<sub>3</sub>): δ /ppm = 5.70 (d, 1H, <sup>1</sup>J<sub>P,H</sub> = 189.9 Hz, PH), 7.22 – 7.25 (m, 6H, *o*-CPh<sub>3</sub>), 7.27 – 7.31 (m, 3H, *p*-CPh<sub>3</sub>), 7.31 – 7.36 (m, 6H, *m*-CPh<sub>3</sub>).

<sup>13</sup>C{<sup>1</sup>H}-NMR (125.75 MHz, 298.0 K, CDCl<sub>3</sub>): δ /ppm = 60.7 (d, <sup>1</sup>J<sub>P,C</sub> = 34.7 Hz, CPh<sub>3</sub>), 127.3 (d, <sup>3</sup>J<sub>P,C</sub> = 1.6 Hz, *o*-CPh<sub>3</sub>), 128.6 (s, *p*-CPh<sub>3</sub>), 129.8 (d, <sup>4</sup>J<sub>P,C</sub> = 8.2 Hz, *m*-CPh<sub>3</sub>), 142.8 (d, <sup>2</sup>J<sub>P,C</sub> = 10.1 Hz, *ipso*-CPh<sub>3</sub>).

<sup>31</sup>P-NMR (202.44 MHz, 298.0 K, CDCl<sub>3</sub>): δ /ppm = 44.9 (d, <sup>1</sup>J<sub>P,H</sub> = 189.9 Hz).

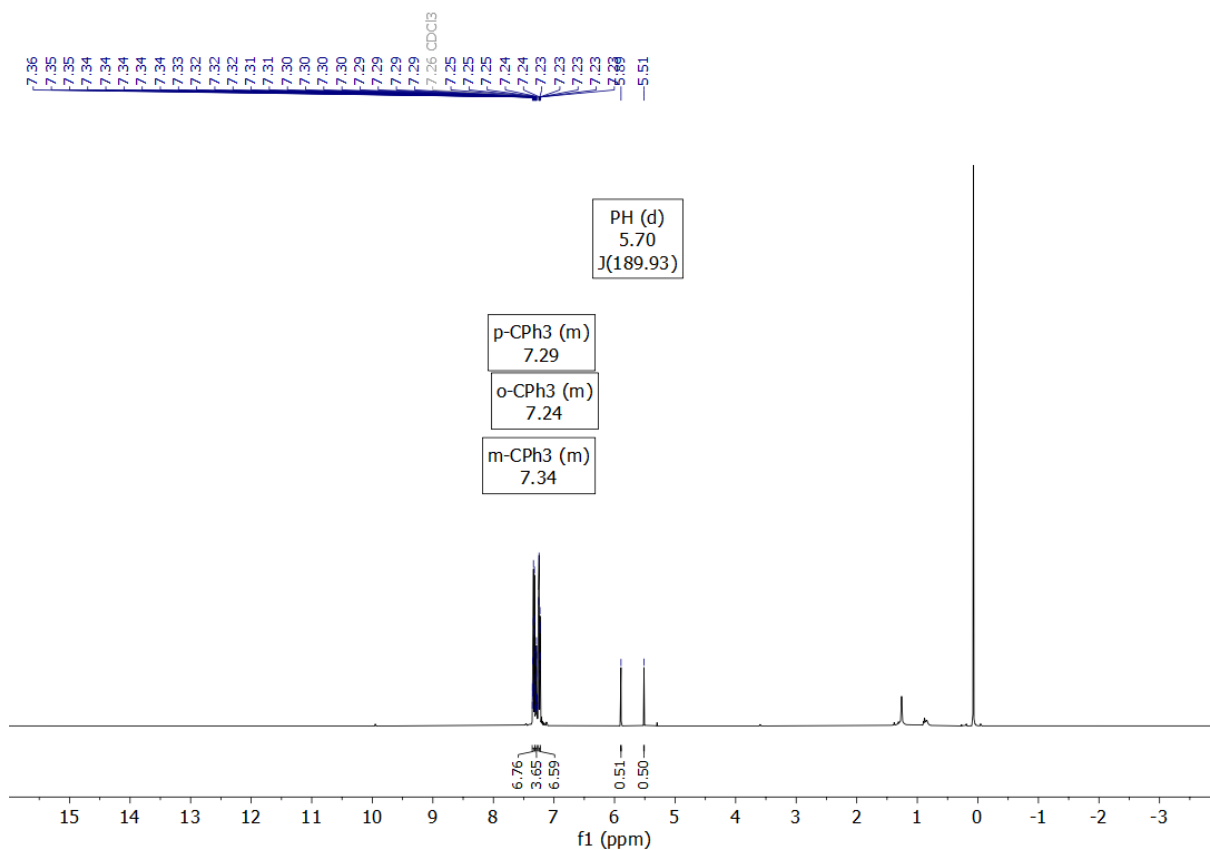

Figure S 44: <sup>1</sup>H-NMR spectrum in CDCl<sub>3</sub>.

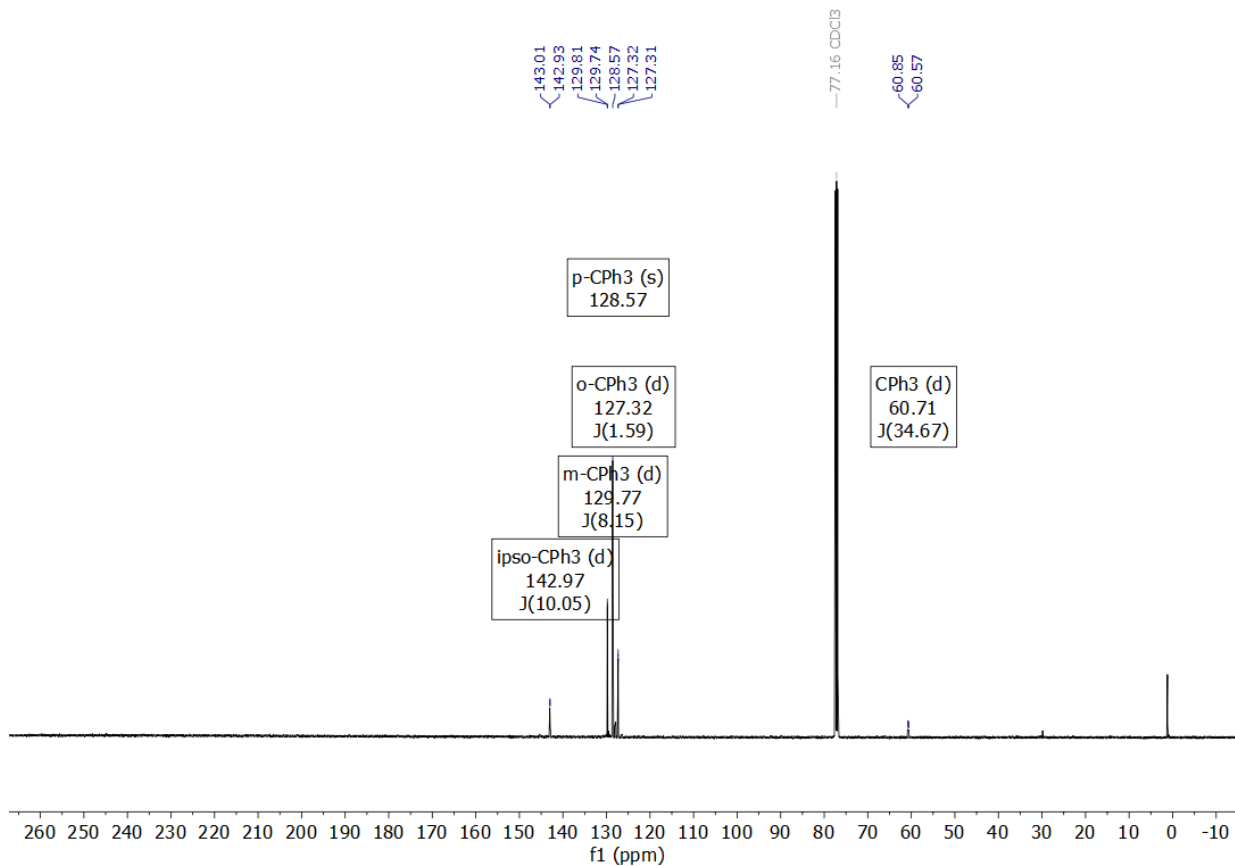

Figure S 45: <sup>13</sup>C{<sup>1</sup>H}-NMR spectrum in CDCl<sub>3</sub>.

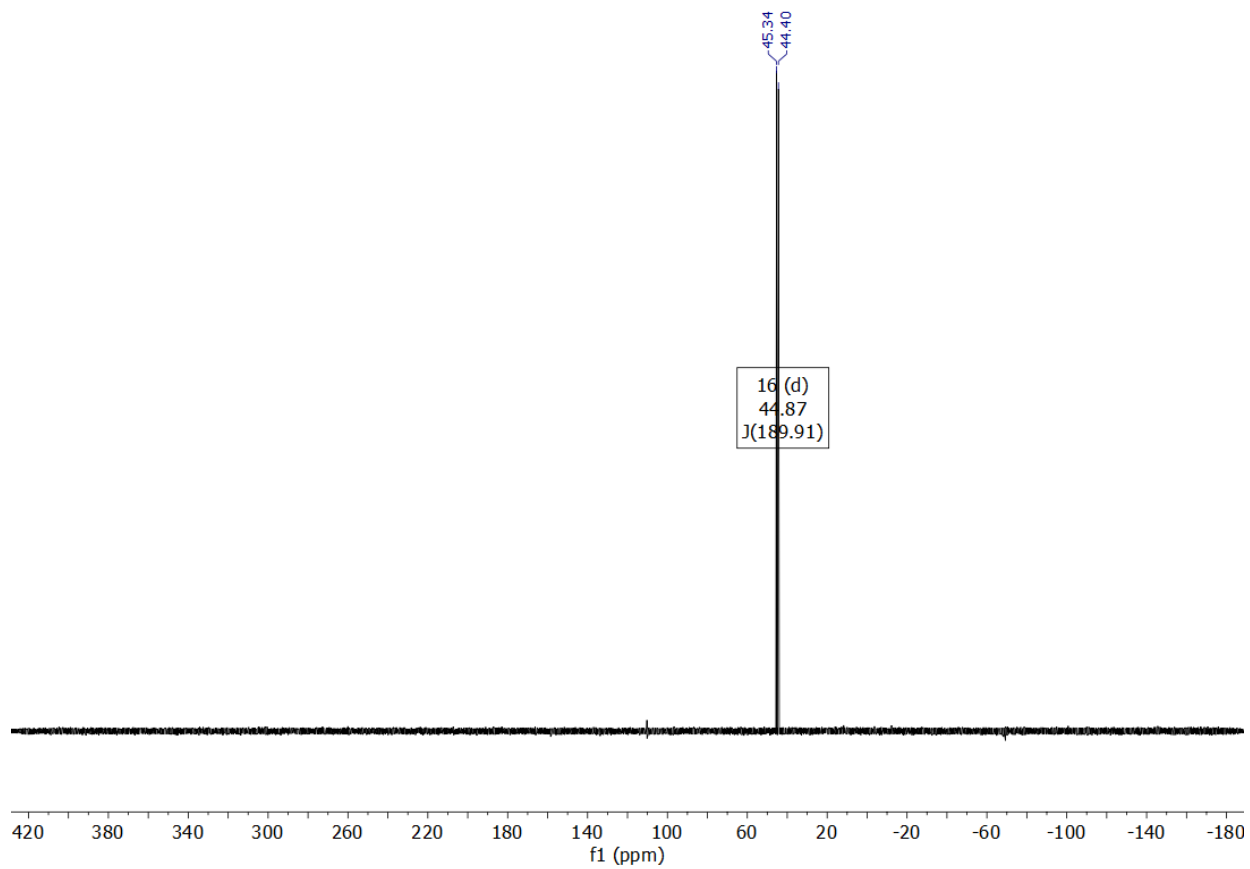

**Figure S 46:** <sup>31</sup>P-NMR spectrum in CDCl<sub>3</sub>.

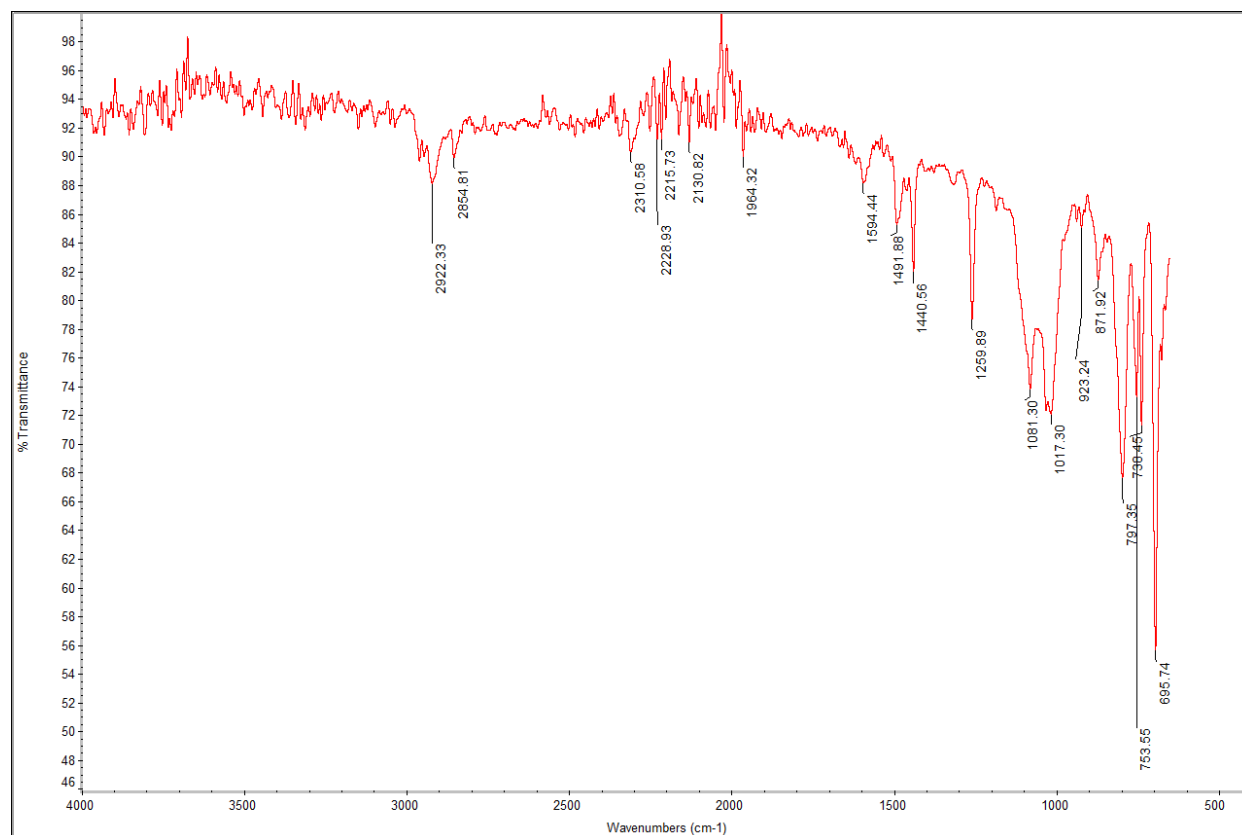

**Figure S 47:** IR spectrum of **16**.

### 1.2.10 Synthesis of compound 19

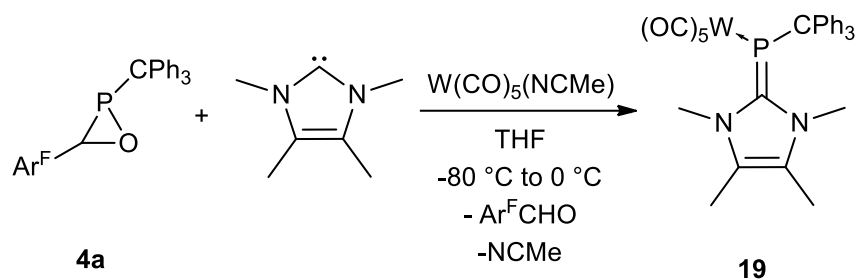

0.192 g (0.46 mmol) of **4a** was dissolved in a minimum volume of THF in a Schlenk tube. To this, 0.056 g (0.46 mmol) of NHC carbene (IMe4) in minimum volume of THF were slowly added at  $-80\text{ }^\circ\text{C}$ . After ten minutes of stirring at  $-80\text{ }^\circ\text{C}$ , 0.168 g (0.46 mmol) of  $\text{W(CO)}_5\text{(NCMe)}$  in THF, which was precooled to  $-80\text{ }^\circ\text{C}$ , was slowly added to the solution. After ten minutes of stirring at  $-80\text{ }^\circ\text{C}$ , the solution was warmed up to  $0\text{ }^\circ\text{C}$  and the solvent was removed under reduced pressure and a yellow-red oily residue was obtained. The residue was redissolved in minimum volume of diethylether and purified *via* column chromatography ( $\varnothing = 3\text{ cm}$ ,  $h = 5\text{ cm}$ ,  $25\text{ }^\circ\text{C}$ ,  $\text{Al}_2\text{O}_3$ , eluent  $\text{Et}_2\text{O}$ ). The yellow fractions obtained after column chromatography were concentrated to a minimum volume and layered with *n*-pentane and stored at  $5\text{ }^\circ\text{C}$ . Dark orange crystals which were suitable for X-ray crystallography were obtained after two weeks.

$^1\text{H-NMR}$  (300.13 MHz, 298.0 K,  $\text{CD}_2\text{Cl}_2$ ):  $\delta$  /ppm = 7.36-7.21 (m, 15H,  $\text{CPh}_3$ ), 3.21 (s, 6H,  $\text{NCH}_3$ ), 2.16 (s, 6H,  $\text{CCH}_3$ ).

$^{31}\text{P}\{^1\text{H}\}$ -NMR (121.51 MHz, 298.0 K,  $\text{CD}_2\text{Cl}_2$ ):  $\delta$  /ppm = -37.7 ( $S_{\text{sat}}$ ,  $^1J_{\text{P-W}} = 114.1\text{ Hz}$ ).

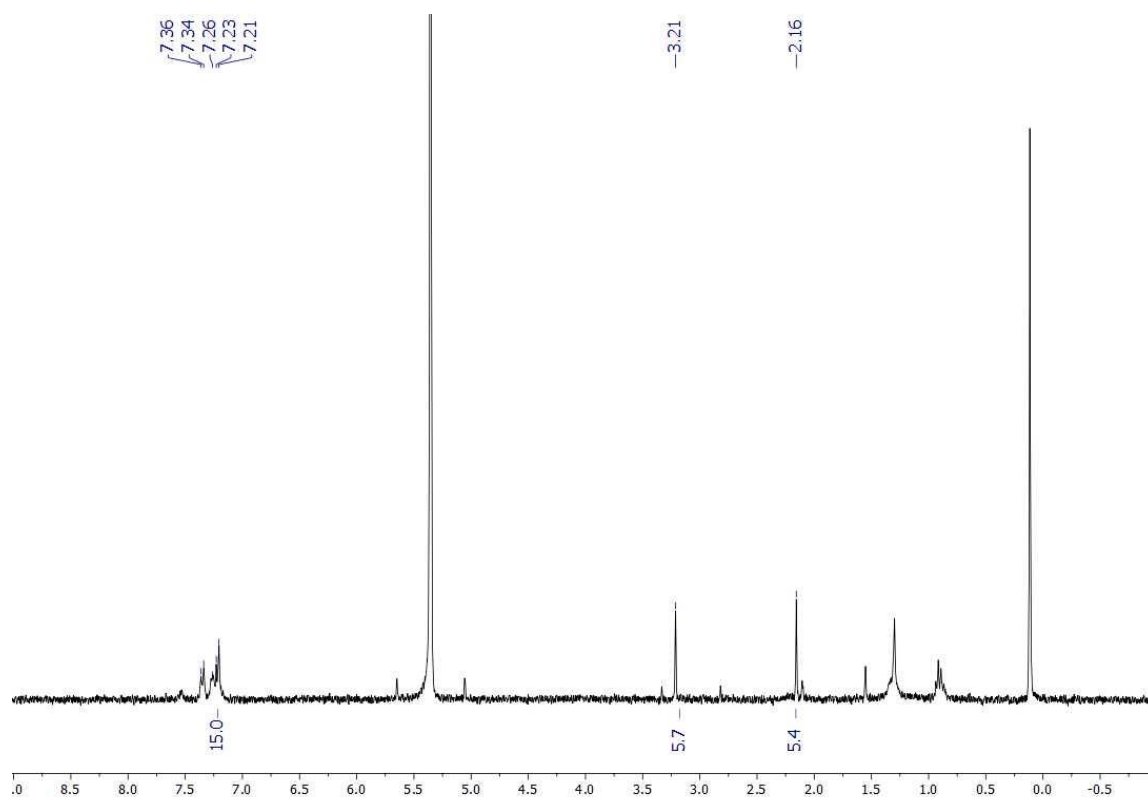

**Figure S 48:**  $^1\text{H-NMR}$  spectrum in  $\text{CD}_2\text{Cl}_2$ .

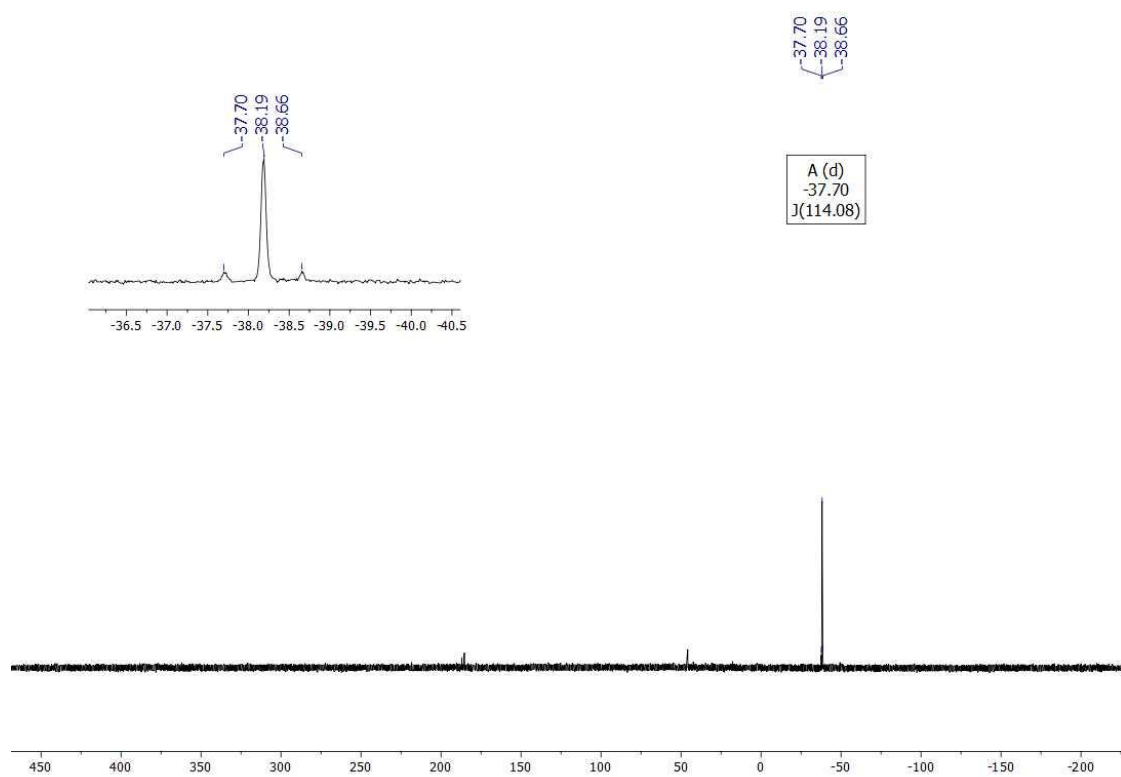

**Figure S 49:**  $^{31}\text{P}\{^1\text{H}\}$ -NMR spectrum in  $\text{CD}_2\text{Cl}_2$ .

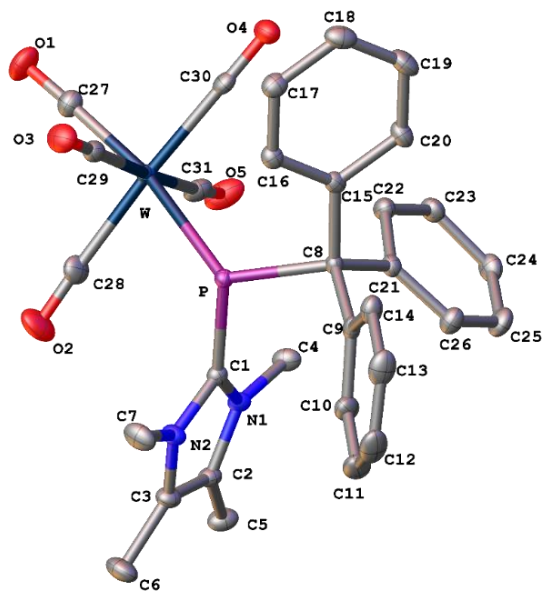

**Figure S 50:** Molecular structure of **19** in the single crystal (50% probability level). The hydrogen atoms are omitted for clarity.

Bond lengths in Å

|   |     |           |    |     |          |
|---|-----|-----------|----|-----|----------|
| W | P   | 2.6146(5) | C8 | C9  | 1.538(2) |
| W | C27 | 1.983(2)  | C8 | C15 | 1.548(2) |

|    |     |            |  |     |     |          |
|----|-----|------------|--|-----|-----|----------|
| W  | C28 | 2.033(2)   |  | C8  | C21 | 1.533(2) |
| W  | C29 | 2.047(2)   |  | C9  | C10 | 1.400(3) |
| W  | C30 | 2.0468(19) |  | C9  | C14 | 1.396(3) |
| W  | C31 | 2.041(2)   |  | C10 | C11 | 1.391(3) |
| P  | C1  | 1.8502(18) |  | C11 | C12 | 1.383(4) |
| P  | C8  | 1.9549(17) |  | C12 | C13 | 1.381(3) |
| O1 | C27 | 1.154(3)   |  | C13 | C14 | 1.394(3) |
| O2 | C28 | 1.143(3)   |  | C15 | C16 | 1.399(3) |
| O3 | C29 | 1.141(3)   |  | C15 | C20 | 1.397(2) |
| O4 | C30 | 1.143(2)   |  | C16 | C17 | 1.390(3) |
| O5 | C31 | 1.144(3)   |  | C17 | C18 | 1.388(3) |
| N1 | C1  | 1.353(2)   |  | C18 | C19 | 1.385(3) |
| N1 | C2  | 1.387(2)   |  | C19 | C20 | 1.392(3) |
| N1 | C4  | 1.456(2)   |  | C21 | C22 | 1.402(3) |
| N2 | C1  | 1.362(2)   |  | C21 | C26 | 1.391(3) |
| N2 | C3  | 1.384(2)   |  | C22 | C23 | 1.391(3) |
| N2 | C7  | 1.462(2)   |  | C23 | C24 | 1.391(3) |
| C2 | C3  | 1.353(3)   |  | C24 | C25 | 1.380(3) |
| C2 | C5  | 1.489(3)   |  | C25 | C26 | 1.399(3) |
| C3 | C6  | 1.491(3)   |  |     |     |          |

Bond angles in °

|     |    |     |            |  |     |     |     |            |
|-----|----|-----|------------|--|-----|-----|-----|------------|
| C27 | W  | P   | 168.23(6)  |  | C9  | C8  | C15 | 109.49(14) |
| C27 | W  | C28 | 92.23(8)   |  | C15 | C8  | P   | 103.56(11) |
| C27 | W  | C29 | 88.81(8)   |  | C21 | C8  | P   | 113.89(12) |
| C27 | W  | C30 | 91.43(8)   |  | C21 | C8  | C9  | 113.13(14) |
| C27 | W  | C31 | 87.73(8)   |  | C21 | C8  | C15 | 110.45(14) |
| C28 | W  | P   | 79.69(6)   |  | C10 | C9  | C8  | 121.28(17) |
| C28 | W  | C29 | 89.44(8)   |  | C14 | C9  | C8  | 121.70(16) |
| C28 | W  | C30 | 176.33(7)  |  | C14 | C9  | C10 | 117.01(17) |
| C28 | W  | C31 | 92.39(8)   |  | C11 | C10 | C9  | 121.4(2)   |
| C29 | W  | P   | 82.60(5)   |  | C12 | C11 | C10 | 120.4(2)   |
| C30 | W  | P   | 96.71(5)   |  | C13 | C12 | C11 | 119.2(2)   |
| C30 | W  | C29 | 90.82(7)   |  | C12 | C13 | C14 | 120.4(2)   |
| C31 | W  | P   | 101.06(5)  |  | C13 | C14 | C9  | 121.41(19) |
| C31 | W  | C29 | 176.15(7)  |  | C16 | C15 | C8  | 121.25(15) |
| C31 | W  | C30 | 87.58(8)   |  | C20 | C15 | C8  | 120.88(16) |
| C1  | P  | W   | 108.98(6)  |  | C20 | C15 | C16 | 117.65(17) |
| C1  | P  | C8  | 106.50(8)  |  | C17 | C16 | C15 | 121.33(17) |
| C8  | P  | W   | 122.37(5)  |  | C18 | C17 | C16 | 120.38(18) |
| C1  | N1 | C2  | 110.92(15) |  | C19 | C18 | C17 | 118.90(18) |
| C1  | N1 | C4  | 126.41(15) |  | C18 | C19 | C20 | 120.85(18) |
| C2  | N1 | C4  | 122.67(15) |  | C19 | C20 | C15 | 120.84(18) |
| C1  | N2 | C3  | 110.74(15) |  | C22 | C21 | C8  | 119.46(16) |
| C1  | N2 | C7  | 126.34(15) |  | C26 | C21 | C8  | 123.05(16) |
| C3  | N2 | C7  | 122.85(16) |  | C26 | C21 | C22 | 117.49(17) |
| N1  | C1 | P   | 133.43(13) |  | C23 | C22 | C21 | 121.46(17) |
| N1  | C1 | N2  | 104.85(15) |  | C22 | C23 | C24 | 120.10(18) |
| N2  | C1 | P   | 121.08(13) |  | C25 | C24 | C23 | 119.10(18) |

|    |    |    |            |  |     |     |     |            |
|----|----|----|------------|--|-----|-----|-----|------------|
| N1 | C2 | C5 | 122.33(17) |  | C24 | C25 | C26 | 120.70(18) |
| C3 | C2 | N1 | 106.73(16) |  | C21 | C26 | C25 | 121.03(18) |
| C3 | C2 | C5 | 130.91(17) |  | O1  | C27 | W   | 178.44(18) |
| N2 | C3 | C6 | 122.68(17) |  | O2  | C28 | W   | 176.10(17) |
| C2 | C3 | N2 | 106.77(16) |  | O3  | C29 | W   | 177.93(18) |
| C2 | C3 | C6 | 130.53(18) |  | O4  | C30 | W   | 177.74(16) |
| C9 | C8 | P  | 105.78(11) |  | O5  | C31 | W   | 175.48(17) |

### 1.3 Computational Details

DFT calculations were performed with the ORCA electronic structure program package (version 4.2.1).<sup>1</sup> All geometry optimizations were run in redundant internal coordinates with tight convergence criteria and using Grimme's dispersion-corrected composite PBEh-3c level.<sup>2</sup> Solvent (THF, CH<sub>2</sub>Cl<sub>2</sub> or toluene) effects were taken into consideration with the CPCM solvation method<sup>3</sup> as implemented in ORCA. Harmonic frequency calculations verified the nature of ground or transition states (TS) having all positive frequencies or only one imaginary frequency, respectively. TS structures were confirmed by following the intrinsic reaction path in both directions of the negative eigenvector. From these optimized geometries, reported final energies were obtained by means of single-point (SP) calculations using the double-hybrid-meta-GGA functional PWPB95<sup>4</sup> using the RI-JK<sup>5</sup> approximation for Coulomb and exchange integrals, Grimme's semiempirical atom-pair-wise London dispersion correction D3<sup>6</sup> and the higher quality def2-QZVPP basis set,<sup>7</sup> and include the Gibbs free energy (G) correction term at the optimization level.

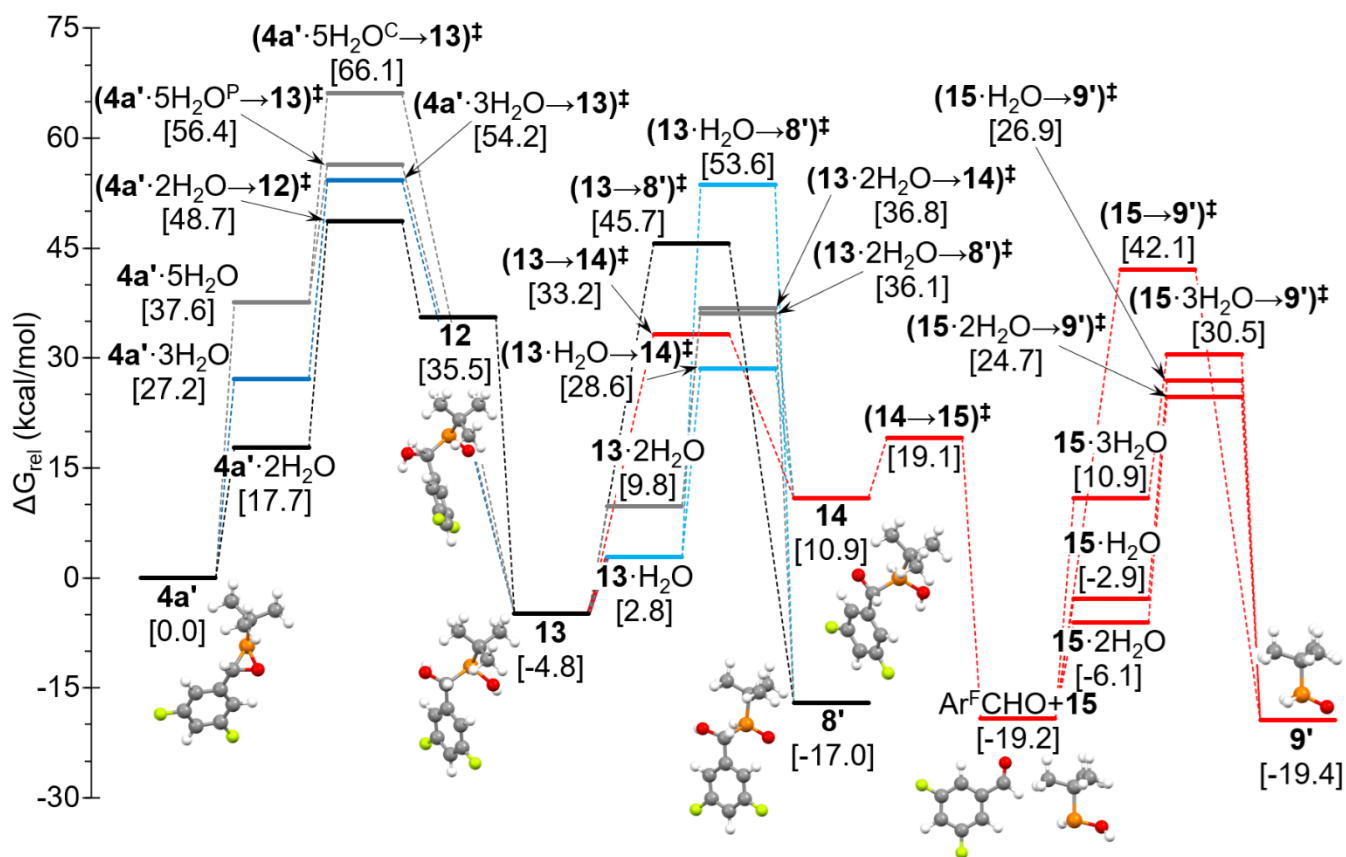

**Figure S 51:** Computed (CPCM<sub>THF</sub>/PWPB95-D3(def2-QZVPP//CPCM<sub>THF</sub>/PBEh-3c) full Gibbs energy profile for the hydrolysis of model **4a'**.



## 1.4 Calculated structures

Cartesian coordinates (in Å), G correction (G-E) and zero-point energy (ZPE) correction (in hartrees) for minima and transition states were computed at the CPCM<sub>solvent</sub>/PBEh-3c, whereas electronic energies (in hartrees) were quoted at the CPCM<sub>solvent</sub>/PWPB95-D4/def2-QZVPP level. Imaginary frequencies were obtained upon frequency calculation at the optimization level.

H<sub>2</sub>O (THF):  
E = -76.4358707077 au  
ZPE = 0.02192289 au  
G<sub>corr</sub> = 0.00428347 au

|                     |          |                    |          |
|---------------------|----------|--------------------|----------|
| O-0.072978-0.096030 | 0.000000 | H-0.3177480.831755 | 0.000000 |
| H0.886469-0.083389  | 0.000000 |                    |          |

TOB (toluene):  
E = -2219.720218136100 au  
ZPE = 0.04919847 au  
G<sub>corr</sub> = 0.01162888 au

|                     |           |                     |           |
|---------------------|-----------|---------------------|-----------|
| C-0.071143-0.066113 | -0.000504 | O-0.659489-1.109535 | -0.001325 |
| C1.466218-0.066196  | 0.000912  | O2.054452-1.109677  | 0.003813  |
| C2.143743 1.238024  | -0.000403 | Cl3.8410011.206126  | 0.000425  |
| C1.433801 2.380924  | -0.001301 | Cl2.2230763.884082  | -0.002703 |
| C-0.0384582.381001  | -0.001124 | Cl-0.8275853.884230 | -0.001408 |
| C-0.7485211.238178  | -0.000708 | Cl-2.4457841.206460 | -0.001377 |

Me<sub>2</sub>O (CH<sub>2</sub>Cl<sub>2</sub>):  
E = -154.9949154134au  
ZPE = 0.05655405 au  
G<sub>corr</sub> = 0.08190337 au

|                     |           |                    |           |
|---------------------|-----------|--------------------|-----------|
| O-0.460105-1.189277 | -0.000408 | C0.941749-1.223849 | 0.000548  |
| C-0.9606610.120633  | -0.000596 | H1.367297-0.737554 | 0.887459  |
| H-0.6435970.684900  | -0.886746 | H1.255345-2.267436 | -0.001131 |
| H-2.0490730.067915  | 0.000162  | H1.368450-0.734523 | -0.884114 |
| H-0.6425460.685409  | 0.884827  |                    |           |

Me<sub>2</sub>O·HCl (CH<sub>2</sub>Cl<sub>2</sub>):  
E = -615.7945124494 au  
ZPE = 0.06046991 au  
G<sub>corr</sub> = 0.09110727 au

|                     |           |                    |           |
|---------------------|-----------|--------------------|-----------|
| Cl3.525237-0.710894 | -2.125031 | H5.554363-2.639658 | 1.566679  |
| H3.705427-1.295262  | -0.920996 | C3.256471-3.270683 | 0.388178  |
| O3.960707-2.039732  | 0.387485  | H2.206115-3.050095 | 0.210250  |
| C5.355900-2.194033  | 0.589587  | H3.620476-3.941735 | -0.394999 |
| H5.806522-2.822237  | -0.183977 | H3.356608-3.768755 | 1.354970  |
| H5.805887-1.204191  | 0.553457  |                    |           |

NHC<sup>Me2</sup> (toluene):

E = -304.724784572 au

ZPE = 0.13063368 au

G<sub>corr</sub> = 0.09987190 au

|                     |           |                     |           |
|---------------------|-----------|---------------------|-----------|
| C-0.005759-0.001062 | -0.004658 | H-2.062479-0.002235 | 1.459326  |
| N-0.007406-0.000071 | 1.349445  | C1.836679-0.000120  | -1.634891 |
| C1.261509 0.000815  | 1.887459  | H2.448723-0.882762  | -1.820075 |
| C2.109433 0.000537  | 0.839126  | H0.996015-0.005137  | -2.321884 |
| N1.318105-0.000490  | -0.289314 | H2.440456 0.887612  | -1.822998 |
| C-1.2148770.000155  | 2.137783  | H1.457401 0.001450  | 2.946736  |
| H-1.269226-0.883762 | 2.773168  | H3.186266 0.000942  | 0.809354  |
| H-1.2713570.886545  | 2.769542  |                     |           |

4a' (THF):

E = -1043.1175109804 au

ZPE = 0.22441953 au

G<sub>corr</sub> = 0.18386429 au

|                     |           |                     |           |
|---------------------|-----------|---------------------|-----------|
| C0.364549 0.033457  | -0.107977 | H0.306546 1.295392  | 2.538281  |
| O1.761850-0.136874  | -0.211771 | H1.886738 0.506248  | 2.425582  |
| P1.369800 1.506268  | -0.439530 | H1.703568 1.999299  | 3.337252  |
| H-0.037981-0.105910 | 0.893652  | C-0.463233-0.549862 | -1.188153 |
| C1.709043 2.309391  | 1.210414  | C0.114998-1.017738  | -2.364322 |
| C3.201981 2.656856  | 1.201566  | C-1.843912-0.610306 | -1.013259 |
| H3.452244 3.237834  | 2.092460  | C-0.711691-1.529018 | -3.345217 |
| H3.824372 1.760406  | 1.206067  | H1.185580-0.994539  | -2.515854 |
| H3.480610 3.255655  | 0.331734  | C-2.618969-1.129434 | -2.029000 |
| C0.876474 3.595038  | 1.199313  | H-2.306906-0.258177 | -0.100139 |
| H1.104652 4.190878  | 2.085967  | C-2.084868-1.600066 | -3.214045 |
| H1.088829 4.217955  | 0.327159  | H-2.710198-2.007450 | -3.997021 |
| H-0.1947053.384747  | 1.209280  | F-3.945651-1.186437 | -1.864069 |
| C1.378048 1.471059  | 2.437679  | F-0.160348-1.982573 | -4.477019 |

4a' (CH<sub>2</sub>Cl<sub>2</sub>):

E = -1043.117822916839 au

ZPE = 0.22438963 au

G<sub>corr</sub> = 0.18383245 au

|                    |           |                     |           |
|--------------------|-----------|---------------------|-----------|
| C1.180369 0.841005 | 0.129375  | C-1.605402-0.939881 | -1.798807 |
| O0.836346 2.063328 | -0.487158 | H-2.538314-0.711418 | -1.278017 |
| H1.801296 0.184091 | -0.476980 | H-1.871759-1.394864 | -2.755505 |
| P-0.5513971.082210 | -0.352493 | H-1.068785-1.689510 | -1.214160 |
| C-0.7542050.310658 | -2.039327 | C1.558949 0.896400  | 1.559767  |
| C-1.5479611.328341 | -2.866411 | C2.125494-0.233694  | 2.145116  |
| H-1.8071390.895637 | -3.835665 | C1.343549 2.044048  | 2.316830  |
| H-2.4806011.618549 | -2.377843 | C2.454201-0.192794  | 3.483793  |
| H-0.9697742.234912 | -3.053072 | H2.307004-1.130502  | 1.566358  |
| C0.535493-0.053811 | -2.762103 | C1.695123 2.026265  | 3.652162  |
| H1.075587-0.856127 | -2.258454 | H0.919458 2.937993  | 1.880166  |
| H0.300141-0.406574 | -3.769261 | C2.252210 0.924832  | 4.272041  |
| H1.204510 0.801441 | -2.865463 | H2.520777 0.937355  | 5.319796  |

F1.492261 3.128325 4.383873 F2.996581-1.277867 4.048868

**4a'** (toluene):

E = -1043.114580991872 au

ZPE = 0.22471016 au

G<sub>corr</sub> = 0.18424067 au

|                     |           |                     |           |
|---------------------|-----------|---------------------|-----------|
| C1.174117 0.841707  | 0.132367  | H-2.542972-0.721693 | -1.291305 |
| O0.818456 2.060333  | -0.480999 | H-1.871569-1.396476 | -2.770269 |
| H1.799392 0.191511  | -0.477155 | H-1.074949-1.700176 | -1.228108 |
| P-0.5613191.071509  | -0.344781 | C1.556836 0.896951  | 1.561720  |
| C-0.7562560.305682  | -2.037948 | C2.120503-0.233708  | 2.148041  |
| C-1.5457551.328223  | -2.862963 | C1.348222 2.046869  | 2.316213  |
| H-1.8012370.903125  | -3.836639 | C2.454005-0.192121  | 3.485497  |
| H-2.4803851.616378  | -2.377044 | H2.296589-1.133340  | 1.572147  |
| H-0.9663422.235703  | -3.040465 | C1.703395 2.031626  | 3.650620  |
| C0.536584-0.053039  | -2.757890 | H0.927666 2.940791  | 1.876584  |
| H1.072585-0.862012  | -2.260273 | C2.257996 0.928741  | 4.270329  |
| H0.308538-0.394695  | -3.770616 | H2.529806 0.942917  | 5.316972  |
| H1.207350 0.802374  | -2.847018 | F1.507690 3.134767  | 4.380022  |
| C-1.608241-0.946296 | -1.810420 | F2.993307-1.277304  | 4.050805  |

**4a''** (toluene):

E = -925.217019679 au

ZPE = 0.13734830 au

G<sub>corr</sub> = 0.10063213 au

|                     |           |                     |           |
|---------------------|-----------|---------------------|-----------|
| C0.055772-0.027929  | 0.025886  | C-1.120288-2.330958 | -2.668273 |
| O0.048531-0.032761  | 1.434148  | H-0.503470-0.285106 | -2.592138 |
| P1.658765-0.045830  | 0.877628  | C-1.360545-3.517647 | -2.001535 |
| H-0.2536200.913625  | -0.429465 | H-1.714356-4.398005 | -2.520532 |
| C2.101432 1.737904  | 0.932017  | F-1.334576-2.288260 | -3.987307 |
| C-0.449499-1.241020 | -0.654923 | F-1.363074-4.652827 | 0.036304  |
| C-0.685046-2.414884 | 0.053536  | H2.504055 1.984213  | 1.915074  |
| C-0.674013-1.193552 | -2.028577 | H2.888387 1.925636  | 0.199547  |
| C-1.132854-3.522465 | -0.639108 | H1.259585 2.396532  | 0.722148  |
| H-0.534150-2.468277 | 1.122943  |                     |           |

**4a'**-2H<sub>2</sub>O:

E = -1195.9948981950 au

ZPE = 0.27291443 au

G<sub>corr</sub> = 0.22636341 au

|                    |           |                    |           |
|--------------------|-----------|--------------------|-----------|
| C0.458758 0.095653 | -0.049444 | H-1.4813313.193601 | -1.144417 |
| O1.829227 0.185518 | -0.385978 | C3.156268 2.703957 | 1.231053  |
| P1.130903 1.752605 | -0.312905 | H3.501437 3.226091 | 2.126644  |
| H0.260986-0.229660 | 0.970526  | H3.747768 1.792822 | 1.135469  |
| C1.658486 2.402144 | 1.358421  | H3.378365 3.345357 | 0.375151  |
| O3.698665-1.216495 | 1.419101  | C0.884456 3.711024 | 1.544272  |
| H3.179384-0.773967 | 0.738182  | H1.226225 4.210622 | 2.453487  |
| H3.203214-2.012259 | 1.620296  | H1.043321 4.403507 | 0.714341  |
| O-1.7849742.700434 | -0.378818 | H-0.1879573.540443 | 1.635086  |
| H-2.0439951.845906 | -0.734015 | C1.416075 1.474548 | 2.541741  |

|                     |           |                     |           |
|---------------------|-----------|---------------------|-----------|
| H0.355214 1.268295  | 2.689113  | H1.007117-0.522544  | -2.664478 |
| H1.950897 0.529236  | 2.440672  | C-2.617857-1.287784 | -1.653164 |
| H1.783043 1.950293  | 3.454820  | H-2.105689-0.622018 | 0.315031  |
| C-0.444694-0.491189 | -1.064091 | C-2.226989-1.529166 | -2.956637 |
| C-0.012102-0.724975 | -2.365136 | H-2.912696-1.933241 | -3.688827 |
| C-1.759799-0.777908 | -0.699568 | F-3.877888-1.563520 | -1.305601 |
| C-0.914530-1.238529 | -3.276148 | F-0.503617-1.468393 | -4.526105 |

**4a'**-3H<sub>2</sub>O:

E = -1272.4363373670 au

ZPE = 0.30051950 au

G<sub>corr</sub> = 0.25121276 au

|                     |           |                     |           |
|---------------------|-----------|---------------------|-----------|
| C0.277486 0.866666  | -0.541238 | H3.968457 2.719282  | -1.593015 |
| O0.066868 1.329413  | 0.787963  | H3.682027 0.995472  | -1.405581 |
| P1.674122 0.773455  | 0.599183  | H2.412591 2.033593  | -2.057096 |
| H0.264548 1.667923  | -1.281452 | C1.956235 3.575777  | 0.166821  |
| C2.713135 2.255591  | 0.103912  | H1.095568 3.601059  | -0.502867 |
| O1.645666 1.881326  | 3.392105  | H1.607605 3.791997  | 1.176073  |
| H1.507048 1.035175  | 3.861057  | H2.622245 4.388159  | -0.135087 |
| H0.778217 2.290174  | 3.358255  | C-0.482451-0.339723 | -0.963390 |
| O1.063218-0.537111  | 4.605016  | C-1.760009-0.585908 | -0.471112 |
| H0.339375-0.737350  | 3.978717  | C0.083355-1.197114  | -1.902398 |
| H0.623973-0.349110  | 5.438653  | C-2.442136-1.697139 | -0.930151 |
| O-0.913236-0.790163 | 2.714605  | H-2.2347820.083964  | 0.233423  |
| H-0.724496-0.031274 | 2.147102  | C-0.645815-2.287500 | -2.329634 |
| H-0.775494-1.557327 | 2.151597  | H1.080325-1.021640  | -2.285975 |
| C3.919391 2.291085  | 1.047314  | C-1.914308-2.571820 | -1.858630 |
| H4.476947 1.351805  | 1.024595  | H-2.466186-3.436760 | -2.201496 |
| H4.604717 3.083560  | 0.737557  | F-0.103730-3.115271 | -3.229272 |
| H3.618951 2.479033  | 2.075600  | F-3.671251-1.936033 | -0.459938 |
| C3.212933 1.979079  | -1.318659 |                     |           |

**4a'**-5H<sub>2</sub>O:

E = -1425.3280560303 au

ZPE = 0.35158077au

G<sub>corr</sub> = 0.29636524 au

|                     |           |                     |          |
|---------------------|-----------|---------------------|----------|
| C0.311631 0.271411  | -0.287631 | H2.358084-1.705417  | 3.157952 |
| O1.672695-0.120613  | -0.304435 | H2.662096-1.071431  | 4.531656 |
| P1.539933 1.557886  | -0.621699 | O-0.408824-0.557372 | 4.482374 |
| H-0.1517240.245639  | 0.695870  | H0.470301-0.954959  | 4.289811 |
| C1.908584 2.387407  | 1.006517  | H-0.829171-1.160801 | 5.100700 |
| O-2.2128162.301218  | 1.231146  | C1.422222 1.672090  | 2.258889 |
| H-2.1664211.436619  | 1.680471  | H1.772095 2.214328  | 3.140915 |
| H-3.1267862.577594  | 1.330925  | H0.335391 1.636873  | 2.317712 |
| O-2.097926-0.167897 | 2.443000  | H1.807842 0.655619  | 2.336325 |
| H-1.447740-0.319838 | 3.168633  | C3.432808 2.543273  | 1.051426 |
| H-2.058020-0.948174 | 1.885186  | H3.823510 3.051691  | 0.167431 |
| O3.008241-1.812465  | 1.550309  | H3.717912 3.136468  | 1.923399 |
| H2.535819-1.265616  | 0.903562  | H3.934627 1.576789  | 1.131987 |
| H3.917861-1.502794  | 1.524822  | C1.240361 3.761681  | 0.889560 |
| O2.029848-1.636735  | 4.080293  | H1.518070 4.378082  | 1.747649 |

|                     |           |                     |           |
|---------------------|-----------|---------------------|-----------|
| H1.551139 4.300772  | -0.008837 | C-2.670581-0.383461 | -2.434393 |
| H0.152761 3.674403  | 0.879053  | H-2.2970660.770682  | -0.665930 |
| C-0.535863-0.251473 | -1.385656 | C-2.184821-1.210281 | -3.431312 |
| C-0.004755-1.078195 | -2.369623 | H-2.822340-1.581578 | -4.222429 |
| C-1.8836390.103298  | -1.413052 | F-3.964686-0.043390 | -2.470572 |
| C-0.845062-1.535725 | -3.366620 | F-0.340455-2.335909 | -4.313625 |
| H1.036484-1.369398  | -2.362233 |                     |           |

TS(4a'+TOB→6'):

E = -3262.831648080847 au

ZPE = 0.27523081 au

G<sub>corr</sub> = 0.22334821 au

v = -376.78 cm<sup>-1</sup>

|                     |           |                      |           |
|---------------------|-----------|----------------------|-----------|
| C-0.5553010.080202  | 1.458637  | C1.626496-3.315385   | 0.361288  |
| O0.390666 0.034280  | 2.574976  | H1.663465-4.382035   | 0.597496  |
| P1.012434-0.731956  | 1.211073  | H1.069118-3.182640   | -0.563337 |
| H-1.434008-0.530406 | 1.628218  | H2.649432-2.969815   | 0.208049  |
| C-0.8200791.406075  | 0.855679  | C-0.502551-3.046153  | 1.686402  |
| C-1.9573131.556886  | 0.060378  | H-1.082549-2.850218  | 0.785679  |
| C0.062785 2.472597  | 1.030068  | H-0.503045-4.125852  | 1.863191  |
| C-2.1701812.767143  | -0.566040 | H-0.986572-2.573117  | 2.541938  |
| H-2.6572070.745266  | -0.081572 | O-0.802317-1.506726  | -1.350908 |
| C-0.2099333.661521  | 0.381955  | O1.612132-0.485333   | -0.640822 |
| H0.939475 2.382784  | 1.654156  | C0.867479 0.149597   | -1.473681 |
| C-1.3126783.845039  | -0.433075 | C1.254800 1.417268   | -1.985820 |
| H-1.4965214.783188  | -0.935875 | C-0.415952-0.461043  | -1.871622 |
| F0.639710 4.695822  | 0.540343  | C0.482005 2.059233   | -2.915426 |
| F-3.2574902.905584  | -1.350525 | C-1.1689100.255453   | -2.889864 |
| C0.950055-2.593099  | 1.531122  | C-0.7444981.458562   | -3.373684 |
| C1.735357-2.812369  | 2.830956  | Cl2.7172272.101461   | -1.388817 |
| H1.284491-2.281777  | 3.669876  | Cl0.9645883.582715   | -3.547602 |
| H1.732359-3.880087  | 3.062975  | Cl-1.6892272.309430  | -4.531683 |
| H2.774242-2.492007  | 2.733296  | Cl-2.661983-0.450086 | -3.367396 |

6':

E = -3262.935726948132 au

ZPE = 0.27872230 au

G<sub>corr</sub> = 0.22594791 au

|                     |           |                     |           |
|---------------------|-----------|---------------------|-----------|
| C0.054426-0.161013  | -0.109909 | F0.722764 4.583699  | -0.798559 |
| O1.440259-0.264667  | 0.316672  | F-3.4838042.733364  | -1.608038 |
| P1.183666-0.972063  | -1.179878 | C1.660653-2.724578  | -0.888011 |
| H-0.651854-0.735026 | 0.492616  | C2.901093-2.756756  | 0.009566  |
| C-0.4337601.195180  | -0.470642 | H2.717361-2.322964  | 0.989975  |
| C-1.7619581.337753  | -0.863219 | H3.194077-3.797806  | 0.155009  |
| C0.419400 2.291724  | -0.450500 | H3.748465-2.239873  | -0.442334 |
| C-2.2105092.588925  | -1.229829 | C1.978281-3.428450  | -2.210635 |
| H-2.4346660.490021  | -0.884134 | H2.322824-4.438565  | -1.983382 |
| C-0.0877533.522158  | -0.823321 | H1.110747-3.519485  | -2.861151 |
| H1.450908 2.198644  | -0.140356 | H2.780933-2.939004  | -2.764748 |
| C-1.3965933.706754  | -1.221307 | C0.485769-3.422721  | -0.195983 |
| H-1.7690144.680039  | -1.510594 | H-0.420555-3.405593 | -0.802586 |

|                    |           |                      |           |
|--------------------|-----------|----------------------|-----------|
| H0.748781-4.468452 | -0.027303 | C2.836920 0.581032   | -5.488486 |
| H0.262023-2.984503 | 0.777133  | C0.767516-0.606348   | -5.050359 |
| O0.365035-1.116668 | -2.715776 | C1.658129-0.001550   | -5.944438 |
| O2.407830-0.121824 | -1.925867 | Cl4.5819931.273009   | -3.513530 |
| C2.263875-0.030039 | -3.265447 | Cl3.9208111.314370   | -6.590245 |
| C3.149613 0.572509 | -4.123549 | Cl1.2859170.008246   | -7.613929 |
| C1.085319-0.605404 | -3.710484 | Cl-0.687628-1.337713 | -5.566327 |

TS(6'→Ar<sup>F</sup>CHO+7'):

E = -3262.899233621381 au

ZPE = 0.27638640 au

G<sub>corr</sub> = 0.22495804 au

v = -220.74 cm<sup>-1</sup>

|                     |           |                      |           |
|---------------------|-----------|----------------------|-----------|
| C0.143607-0.187901  | 0.173672  | C2.006323-3.719776   | -2.031580 |
| O1.195517-0.261971  | 0.898763  | H2.472719-4.655795   | -1.719687 |
| P0.888815-1.325262  | -1.269292 | H1.141391-3.971792   | -2.642744 |
| H-0.797659-0.674764 | 0.495759  | H2.730037-3.191132   | -2.653233 |
| C-0.1582431.081522  | -0.597894 | C0.566260-3.669402   | 0.038844  |
| C-1.3207741.177867  | -1.356850 | H-0.348107-3.833678  | -0.534157 |
| C0.776281 2.106562  | -0.589721 | H0.949752-4.649306   | 0.327281  |
| C-1.5170572.312974  | -2.114671 | H0.313301-3.133102   | 0.953700  |
| H-2.0554680.381278  | -1.362563 | O0.252547-1.526665   | -2.819595 |
| C0.527103 3.222575  | -1.364503 | O2.141749-0.376600   | -1.799840 |
| H1.676835 2.024173  | 0.003270  | C1.865439 0.065334   | -3.051162 |
| C-0.6061153.353836  | -2.144171 | C2.522505 1.084199   | -3.696082 |
| H-0.7770074.234839  | -2.747983 | C0.800763-0.597029   | -3.635463 |
| F1.418517 4.217540  | -1.372737 | C2.103008 1.415995   | -4.989564 |
| F-2.6255192.417770  | -2.854493 | C0.370646-0.280294   | -4.901891 |
| C1.640776-2.934851  | -0.767864 | C1.041837 0.739861   | -5.585819 |
| C2.898025-2.720233  | 0.081278  | Cl3.7914501.903108   | -2.907882 |
| H2.678402-2.210569  | 1.014190  | Cl2.9002612.674483   | -5.825927 |
| H3.315866-3.702795  | 0.310488  | Cl0.5345351.157632   | -7.163077 |
| H3.661472-2.155365  | -0.452230 | Cl-0.952493-1.116905 | -5.578451 |

C<sub>6</sub>H<sub>3</sub>F<sub>2</sub>-CHO (THF):

E = -544.0016040614 au

ZPE = 0.06362732 au

G<sub>corr</sub> = 0.09650243 au

|                     |           |                     |           |
|---------------------|-----------|---------------------|-----------|
| C-1.8380400.030112  | 0.710143  | H-1.5895100.413752  | -1.976448 |
| H-1.983779-0.366871 | 1.729608  | C-2.395085-3.224719 | -1.011991 |
| O-1.5880931.193587  | 0.520033  | H-2.389536-2.568037 | 1.030417  |
| C-1.975424-0.973912 | -0.364971 | C-2.245154-2.903123 | -2.346320 |
| C-1.816164-0.607116 | -1.698907 | H-2.349536-3.652414 | -3.120116 |
| C-2.266302-2.285412 | -0.007765 | F-2.674260-4.489701 | -0.688000 |
| C-1.955684-1.585042 | -2.658521 | F-1.808172-1.260997 | -3.945699 |

C<sub>6</sub>H<sub>3</sub>F<sub>2</sub>-CHO (CH<sub>2</sub>Cl<sub>2</sub>):

E = -544.001950541765 au

ZPE = 0.09648854 au

G<sub>corr</sub> = 0.06361152 au

|                    |           |                    |          |
|--------------------|-----------|--------------------|----------|
| C1.302186 0.954265 | 0.128871  | H2.559445-0.981948 | 1.479953 |
| O0.731801 1.850629 | -0.440417 | C1.613907 2.007034 | 3.701528 |
| H1.622824 0.045095 | -0.408149 | H0.769504 2.910030 | 1.950399 |
| C1.630232 0.964474 | 1.569206  | C2.271156 0.929724 | 4.272563 |
| C2.290586-0.136834 | 2.101482  | H2.519020 0.918666 | 5.325951 |
| C1.283079 2.052996 | 2.365542  | F1.292930 3.037432 | 4.488435 |
| C2.597309-0.128630 | 3.448087  | F3.231361-1.177926 | 3.977467 |

C<sub>6</sub>H<sub>3</sub>F<sub>2</sub>-CHO (toluene):

E = -543.998517645016 au

ZPE = 0.09662622 au

G<sub>corr</sub> = 0.06377042 au

|                    |           |                    |          |
|--------------------|-----------|--------------------|----------|
| C1.300919 0.956746 | 0.128208  | H2.560205-0.982664 | 1.482255 |
| O0.732170 1.852412 | -0.439108 | C1.613733 2.007351 | 3.701752 |
| H1.621265 0.046548 | -0.410221 | H0.769668 2.907402 | 1.947377 |
| C1.630460 0.963763 | 1.569584  | C2.271140 0.929770 | 4.272297 |
| C2.290701-0.136904 | 2.102612  | H2.519031 0.919247 | 5.325451 |
| C1.283357 2.051941 | 2.365394  | F1.293083 3.036707 | 4.487908 |
| C2.597943-0.129438 | 3.449158  | F3.231666-1.177871 | 3.978250 |

7':

E = -2718.924313657508 au

ZPE = 0.17842989 au

G<sub>corr</sub> = 0.13477619 au

|                     |           |                      |           |
|---------------------|-----------|----------------------|-----------|
| P1.251877-0.866181  | -1.211504 | H0.047639-2.866203   | 0.409697  |
| C1.733794-2.649317  | -0.977252 | O0.361105-0.924716   | -2.653676 |
| C2.796184-2.640406  | 0.135491  | O2.620696-0.232725   | -1.985289 |
| H2.441056-2.129643  | 1.034451  | C2.424009-0.186234   | -3.330021 |
| H3.035182-3.669876  | 0.414584  | C3.349807 0.230296   | -4.259869 |
| H3.718266-2.156960  | -0.191591 | C1.147395-0.578492   | -3.708218 |
| C2.271636-3.329966  | -2.235600 | C2.968042 0.256579   | -5.610407 |
| H2.537572-4.364740  | -2.001716 | C0.757471-0.568359   | -5.028622 |
| H1.526063-3.354204  | -3.031294 | C1.685152-0.140006   | -5.991605 |
| H3.169927-2.837726  | -2.610314 | Cl4.9168980.702306   | -3.724366 |
| C0.458678-3.351536  | -0.479326 | Cl4.1029500.793637   | -6.794209 |
| H-0.316671-3.372632 | -1.247513 | Cl1.218465-0.101719  | -7.652950 |
| H0.695362-4.384431  | -0.211211 | Cl-0.840021-1.069581 | -5.431157 |

TS(7'+TOB→5'):

E = -4938.636998161290 au

ZPE = 0.22885534 au

G<sub>corr</sub> = 0.17240629 au

$\nu$  = -233.14 cm<sup>-1</sup>

|                    |           |                     |           |
|--------------------|-----------|---------------------|-----------|
| C0.530101-1.785507 | 0.612499  | H-0.938886-2.685239 | -0.739755 |
| C2.027895-1.935623 | 0.906305  | H0.691110-2.587147  | -1.420251 |
| H2.353892-1.315050 | 1.740099  | C-0.267992-2.124154 | 1.874685  |
| H2.217388-2.974908 | 1.182767  | H-1.344826-2.067971 | 1.719902  |
| H2.650393-1.709684 | 0.043274  | H-0.037366-3.155771 | 2.149957  |
| C0.123255-2.745146 | -0.506301 | H-0.001223-1.508367 | 2.733699  |
| H0.325215-3.763727 | -0.166930 | O-0.682164-0.253245 | -1.830572 |

|                     |           |                     |          |
|---------------------|-----------|---------------------|----------|
| O1.914049-0.200674  | -1.804111 | O-1.3641870.294018  | 0.613676 |
| C1.358613 0.277046  | -2.789663 | O0.8314240.775957   | 1.552494 |
| C2.041030 0.995010  | -3.839834 | C-0.1733861.199464  | 2.331476 |
| C-0.1127530.240430  | -2.815972 | C-1.4230620.911178  | 1.804526 |
| C1.336386 1.522483  | -4.874236 | C-1.2072152.221906  | 4.219523 |
| C-0.8095000.923435  | -3.866261 | C-2.5771901.259200  | 2.467192 |
| C-0.1093591.486421  | -4.888546 | C-2.4609331.925376  | 3.692435 |
| Cl3.7388001.062543  | -3.757110 | C-0.0431491.858148  | 3.533536 |
| Cl2.1437332.266872  | -6.174731 | Cl1.5158862.189982  | 4.145771 |
| Cl-0.9273512.191681 | -6.202076 | Cl-1.0743913.035549 | 5.717991 |
| Cl-2.5109750.918667 | -3.815491 | Cl-3.8784612.371349 | 4.538793 |
| P0.236940 0.014569  | 0.129705  | Cl-4.0917420.870931 | 1.781533 |

5':

E = -4938.751246250255 au

ZPE = 0.23334925 au

G<sub>corr</sub> = 0.17859671 au

|                     |           |                      |           |
|---------------------|-----------|----------------------|-----------|
| C1.774844-2.460749  | -0.881760 | C0.650804-0.465218   | -5.026411 |
| C3.192810-2.537566  | -0.300095 | C1.556896-0.182256   | -6.055234 |
| H3.278332-2.045530  | 0.667531  | Cl4.9624920.494961   | -4.041419 |
| H3.439315-3.590048  | -0.151811 | Cl3.9848340.454683   | -7.033302 |
| H3.945293-2.117997  | -0.966167 | Cl1.014199-0.215915  | -7.676189 |
| C1.727023-3.259805  | -2.190075 | Cl-0.985399-0.843627 | -5.327166 |
| H2.000122-4.292152  | -1.966550 | P1.348039-0.691007   | -1.217992 |
| H0.733753-3.278157  | -2.636595 | O-0.151200-0.436233  | -0.459805 |
| H2.440111-2.902825  | -2.934074 | O2.0863150.186336    | 0.023406  |
| C0.786658-3.074055  | 0.115894  | C1.264553 0.442471   | 1.051295  |
| H-0.238218-3.073356 | -0.252169 | C-0.0366080.081181   | 0.767953  |
| H1.074299-4.113245  | 0.282885  | C0.595993 1.204874   | 3.197860  |
| H0.806660-2.581368  | 1.088784  | C-1.0479740.264741   | 1.680449  |
| O0.409593-0.666889  | -2.622802 | C-0.7175210.838446   | 2.913656  |
| O2.677593-0.164753  | -2.133608 | C1.611234 1.007640   | 2.254654  |
| C2.437511-0.142770  | -3.449686 | Cl3.2357221.432784   | 2.556738  |
| C3.342609 0.141236  | -4.444306 | Cl0.9875511.897863   | 4.710989  |
| C1.119999-0.435510  | -3.735704 | Cl-1.9471461.077795  | 4.077132  |
| C2.886481 0.116768  | -5.767443 | Cl-2.640053-0.206819 | 1.288096  |

TS(4a'·2H<sub>2</sub>O→I-12):

E = -1195.9471407325 au

ZPE = 0.27327421 au

G<sub>corr</sub> = 0.22791046 au

$\nu$  = -386.89 cm<sup>-1</sup>

|                     |           |                    |           |
|---------------------|-----------|--------------------|-----------|
| C-0.463181-0.088847 | -0.069525 | H-1.9719511.724436 | -0.718189 |
| O1.608880-0.785426  | -0.109868 | H-2.7701070.757200 | 0.174396  |
| P1.156366 0.710715  | -0.388743 | C2.999928 1.782722 | 1.254379  |
| H-0.611328-0.433519 | 0.949239  | H3.299104 2.407484 | 2.099772  |
| C1.471298 1.694736  | 1.179279  | H3.4520490.799222  | 1.391909  |
| O0.793862-2.696037  | 1.655985  | H3.428992 2.225969 | 0.352023  |
| H1.130256-1.995977  | 1.059740  | C0.890565 3.095138 | 0.990815  |
| H0.745536-3.476875  | 1.100716  | H1.176744 3.739521 | 1.826450  |
| O-1.9224141.218187  | 0.103607  | H1.256542 3.565578 | 0.075323  |



|                     |           |                     |           |
|---------------------|-----------|---------------------|-----------|
| H-0.1995733.084260  | 0.949051  | C-1.562504-1.408479 | -3.387720 |
| C0.939448 1.057798  | 2.456704  | H-0.4832430.329241  | -2.755876 |
| H-0.1504281.082024  | 2.505980  | C-2.227976-2.932291 | -1.712241 |
| H1.263352 0.020853  | 2.559250  | H-1.693336-2.447625 | 0.307409  |
| H1.309213 1.600598  | 3.331064  | C-2.195392-2.591395 | -3.050451 |
| C-1.036099-0.957994 | -1.108455 | H-2.641664-3.225919 | -3.804885 |
| C-0.980917-0.582454 | -2.450379 | F-2.828244-4.072306 | -1.361086 |
| C-1.665610-2.141902 | -0.730131 | F-1.518165-1.058637 | -4.675543 |

**I-12:**

E = -1119.5165113113 au

ZPE = 0.25002010 au

G<sub>corr</sub> = 0.20789559 au

|                    |           |                     |           |
|--------------------|-----------|---------------------|-----------|
| C-0.9618870.939883 | -0.514577 | C0.919677 0.041581  | 1.896421  |
| O1.7036700.332417  | -1.206415 | H-0.153336-0.157918 | 1.928585  |
| P0.909846 1.465504 | -0.549887 | H1.389606-0.753413  | 1.315662  |
| H-1.4749791.204565 | 0.406512  | H1.289317-0.031395  | 2.923681  |
| C1.235784 1.411779 | 1.304500  | C-1.287297-0.434275 | -0.951727 |
| O-1.5384881.942019 | -1.509928 | C-0.827137-0.928895 | -2.172477 |
| H-0.7775302.514686 | -1.798716 | C-2.025731-1.255077 | -0.100459 |
| H-1.9702371.542087 | -2.288359 | C-1.139040-2.228926 | -2.514994 |
| C2.734527 1.688625 | 1.452312  | H-0.218919-0.330880 | -2.835692 |
| H3.016427 1.691387 | 2.508676  | C-2.282647-2.554963 | -0.483871 |
| H3.331493 0.927756 | 0.948575  | H-2.400326-0.884831 | 0.844927  |
| H3.010802 2.660309 | 1.035219  | C-1.859431-3.073322 | -1.692469 |
| C0.451487 2.513340 | 2.011134  | H-2.081671-4.091892 | -1.981519 |
| H0.731557 2.562700 | 3.066976  | F-2.988031-3.342567 | 0.335274  |
| H0.651258 3.493855 | 1.573013  | F-0.712151-2.703481 | -3.690383 |
| H-0.6281002.351828 | 1.979155  |                     |           |

**I-13:**

E = -1119.5817306524 au

ZPE = 0.25143484 au

G<sub>corr</sub> = 0.20878437 au

|                    |           |                     |           |
|--------------------|-----------|---------------------|-----------|
| C-0.9364420.694151 | -0.361794 | H1.419193-0.376042  | 2.307805  |
| P0.938786 0.938171 | -0.413911 | H1.214560 1.005693  | 3.378343  |
| H-1.2784110.539631 | 0.665175  | C-1.316858-0.507746 | -1.178543 |
| C1.328037 1.559942 | 1.300137  | C-1.618821-0.384034 | -2.530933 |
| O-1.5243121.890842 | -0.808835 | C-1.323387-1.764669 | -0.579250 |
| H-0.9844862.274485 | -1.509678 | C-1.921405-1.523423 | -3.251071 |
| C2.844211 1.779951 | 1.339476  | H-1.6361020.577635  | -3.025752 |
| H3.134016 2.186003 | 2.311688  | C-1.634483-2.867996 | -1.345210 |
| H3.394431 0.849388 | 1.194280  | H-1.099145-1.880590 | 0.473202  |
| H3.170289 2.487972 | 0.575127  | C-1.939098-2.785261 | -2.691290 |
| C0.618567 2.902222 | 1.488262  | H-2.184756-3.662975 | -3.273836 |
| H0.938429 3.352303 | 2.430996  | F-1.648395-4.075175 | -0.765493 |
| H0.859588 3.608406 | 0.690808  | F-2.214734-1.402944 | -4.552347 |
| H-0.4658232.798773 | 1.528343  | O1.516284-0.608421  | -0.275275 |
| C0.926061 0.590299 | 2.409301  | H1.863018-0.918883  | -1.117592 |
| H-0.1509150.419374 | 2.444811  |                     |           |

***u*-13:**

E = -1119.5836231911 au

ZPE = 0.25159948 au

G<sub>corr</sub> = 0.20895945 au

|                    |           |                     |           |
|--------------------|-----------|---------------------|-----------|
| C-0.9364420.694151 | -0.361794 | H1.419193-0.376042  | 2.307805  |
| P0.938786 0.938171 | -0.413911 | H1.214560 1.005693  | 3.378343  |
| H-1.2784110.539631 | 0.665175  | C-1.316858-0.507746 | -1.178543 |
| C1.328037 1.559942 | 1.300137  | C-1.618821-0.384034 | -2.530933 |
| O-1.5243121.890842 | -0.808835 | C-1.323387-1.764669 | -0.579250 |
| H-0.9844862.274485 | -1.509678 | C-1.921405-1.523423 | -3.251071 |
| C2.844211 1.779951 | 1.339476  | H-1.6361020.577635  | -3.025752 |
| H3.134016 2.186003 | 2.311688  | C-1.634483-2.867996 | -1.345210 |
| H3.394431 0.849388 | 1.194280  | H-1.099145-1.880590 | 0.473202  |
| H3.170289 2.487972 | 0.575127  | C-1.939098-2.785261 | -2.691290 |
| C0.618567 2.902222 | 1.488262  | H-2.184756-3.662975 | -3.273836 |
| H0.938429 3.352303 | 2.430996  | F-1.648395-4.075175 | -0.765493 |
| H0.859588 3.608406 | 0.690808  | F-2.214734-1.402944 | -4.552347 |
| H-0.4658232.798773 | 1.528343  | O1.516284-0.608421  | -0.275275 |
| C0.926061 0.590299 | 2.409301  | H1.863018-0.918883  | -1.117592 |
| H-0.1509150.419374 | 2.444811  |                     |           |

**TS(4a'-3H2O→*u*-13):**

E = -1272.3934582354 au

ZPE = 0.29798322 au

G<sub>corr</sub> = 0.25146066 au

$\nu = -315.68 \text{ cm}^{-1}$

|                     |           |                     |           |
|---------------------|-----------|---------------------|-----------|
| C-0.5758870.234720  | -0.768817 | H3.007698 1.901446  | -1.926167 |
| O-0.8111520.627003  | 0.612761  | H2.678529 0.192043  | -1.666673 |
| P0.878682 0.085009  | 0.563867  | H1.391270 1.264451  | -2.209179 |
| H-0.7251841.084650  | -1.431538 | C1.234978 2.866522  | 0.006312  |
| C1.926342 1.509051  | -0.096483 | H0.320709 2.915134  | -0.585599 |
| O1.076437 0.506554  | 2.286425  | H0.979589 3.131383  | 1.034725  |
| H0.062164-0.320504  | 3.384212  | H1.902621 3.648572  | -0.364691 |
| H1.015451 1.449574  | 2.490688  | C-1.212326-0.993086 | -1.225447 |
| O-0.695601-0.736188 | 3.868744  | C-1.487361-2.069012 | -0.370764 |
| H-1.860797-0.371647 | 2.960804  | C-1.476137-1.141576 | -2.594181 |
| H-0.750199-0.280089 | 4.714443  | C-2.006138-3.233685 | -0.899251 |
| O-2.462301-0.046220 | 2.196257  | H-1.270878-2.031047 | 0.688315  |
| H-1.6811500.265073  | 1.310737  | C-1.985717-2.331108 | -3.062581 |
| H-3.039403-0.773777 | 1.932170  | H-1.284835-0.328173 | -3.282755 |
| C3.247564 1.544148  | 0.685147  | C-2.273121-3.408733 | -2.242599 |
| H3.734841 0.566926  | 0.703703  | H-2.682936-4.331186 | -2.630335 |
| H3.934741 2.241786  | 0.200304  | F-2.232449-2.454203 | -4.374711 |
| H3.125814 1.873423  | 1.715672  | F-2.263758-4.252420 | -0.066196 |
| C2.259900 1.195185  | -1.557320 |                     |           |

**TS(4a'-5H2O→*l*-13):**

E = -1425.2862869942 au

ZPE = 0.35308322 au

G<sub>corr</sub> = 0.30006304 au

$\nu = -302.91 \text{ cm}^{-1}$

|                     |           |                     |           |
|---------------------|-----------|---------------------|-----------|
| C0.270330 0.669356  | 0.167079  | H1.139535 1.802977  | 2.639769  |
| O2.192615 0.083977  | -0.358203 | H2.611121 0.861817  | 2.318949  |
| P1.686873 1.598580  | -0.483277 | C3.833407 2.738613  | 0.681652  |
| H0.367907 0.290468  | 1.178606  | H3.994104 3.232915  | -0.279317 |
| C2.343049 2.556636  | 0.989003  | H4.304301 3.356326  | 1.450523  |
| O-1.2132481.896333  | 0.790932  | H4.359138 1.782340  | 0.656364  |
| H-1.9273031.331168  | 1.219625  | C1.649000 3.917797  | 0.998658  |
| H-1.6054782.288174  | 0.003432  | H2.092912 4.563719  | 1.760866  |
| O-2.9781870.377122  | 1.923540  | H1.749031 4.429730  | 0.038981  |
| H-2.511059-0.327481 | 2.441966  | H0.585464 3.826948  | 1.222168  |
| H-3.496523-0.095415 | 1.266847  | C-0.524821-0.156787 | -0.759055 |
| O2.509787-1.753223  | 1.498792  | C-0.7566550.279665  | -2.062773 |
| H2.416287-1.060667  | 0.794564  | C-1.073844-1.356844 | -0.313257 |
| H3.446787-1.794371  | 1.702651  | C-1.529385-0.501868 | -2.894919 |
| O0.922694-1.221575  | 3.557849  | H-0.3253761.203764  | -2.426235 |
| H1.530005-1.445871  | 2.807854  | C-1.835155-2.102922 | -1.190512 |
| H1.197928-0.357882  | 3.872574  | H-0.900170-1.716933 | 0.691874  |
| O-1.675692-1.553615 | 3.161904  | C-2.085556-1.700519 | -2.488129 |
| H-0.711116-1.420671 | 3.329237  | H-2.684229-2.301270 | -3.159695 |
| H-2.040081-1.927581 | 3.967033  | F-2.358242-3.257958 | -0.772293 |
| C2.186111 1.866192  | 2.335971  | F-1.756447-0.089664 | -4.144505 |
| H2.711800 2.428805  | 3.112433  |                     |           |

TS(4a'·5H<sub>2</sub>O→u-13):

E = -1425.3001888847 au

ZPE = 0.35023992 au

G<sub>corr</sub> = 0.29849622 au

$\nu = -429.39 \text{ cm}^{-1}$

|                     |           |                     |           |
|---------------------|-----------|---------------------|-----------|
| C0.275432-0.430784  | -0.737790 | H0.191258 1.288676  | 2.262222  |
| O1.588223-0.458920  | -1.119058 | H1.515879 0.245091  | 1.731409  |
| P0.262169 1.386561  | -0.885313 | C2.762240 2.076873  | 0.071492  |
| H0.059968-0.803986  | 0.278649  | H2.875891 2.580784  | -0.890275 |
| C1.301342 2.054057  | 0.535849  | H3.360303 2.626560  | 0.802970  |
| O-1.3431511.859666  | -0.170400 | H3.174367 1.076387  | -0.023772 |
| H-1.8280491.302413  | 0.727090  | C0.862875 3.508636  | 0.756126  |
| H-1.9895452.083153  | -0.852252 | H1.566393 3.990586  | 1.438928  |
| O-2.3085550.767245  | 1.725609  | H0.867997 4.083508  | -0.172970 |
| H-1.979097-0.173552 | 1.962852  | H-0.1285603.590338  | 1.198252  |
| H-3.2731160.752009  | 1.700367  | C-0.692657-1.079347 | -1.694827 |
| O2.690070-1.979050  | 0.569565  | C-0.253933-1.422644 | -2.968815 |
| H2.292074-1.361030  | -0.143795 | C-2.019198-1.312317 | -1.334889 |
| H3.442678-1.502446  | 0.929438  | C-1.151904-1.986995 | -3.852332 |
| O0.953858-2.382413  | 2.527672  | H0.776181-1.254528  | -3.251386 |
| H1.593730-2.233243  | 1.778750  | C-2.874363-1.875711 | -2.258486 |
| H1.376285-2.004807  | 3.303865  | H-2.384658-1.073036 | -0.345496 |
| O-1.531362-1.549118 | 2.382124  | C-2.474912-2.227758 | -3.534237 |
| H-0.570183-1.818597 | 2.403790  | H-3.160110-2.673037 | -4.242925 |
| H-1.997566-2.267068 | 1.943638  | F-4.149226-2.100732 | -1.907426 |
| C1.197836 1.279902  | 1.844537  | F-0.728519-2.321379 | -5.079451 |
| H1.851615 1.740051  | 2.590701  |                     |           |

**I-13-H2O:**

E = -1196.0242308993 au

ZPE = 0.27678862 au

G<sub>corr</sub> = 0.23230402 au

|                     |           |                     |           |
|---------------------|-----------|---------------------|-----------|
| C0.179037 0.173169  | 0.067771  | C-0.7143641.269678  | -0.451215 |
| P-0.0242810.083541  | 1.946325  | C-2.0404701.006983  | -0.784431 |
| H1.213639 0.434831  | -0.174072 | C-0.2178722.565685  | -0.562015 |
| C1.558205-0.710101  | 2.535661  | C-2.8345042.048504  | -1.221870 |
| O-0.079741-1.079465 | -0.499771 | H-2.4614350.012940  | -0.714308 |
| C2.820788-0.014395  | 2.033445  | C-1.0553993.568021  | -1.005703 |
| H3.700438-0.482874  | 2.482554  | H0.812196 2.789148  | -0.317318 |
| H2.935591-0.093786  | 0.951750  | C-2.3760693.345424  | -1.346020 |
| H2.841179 1.042193  | 2.301200  | H-3.0159924.144016  | -1.696535 |
| C1.512816-0.646630  | 4.066648  | F-0.5720284.812121  | -1.119145 |
| H2.385155-1.157556  | 4.481541  | F-4.1098701.794825  | -1.543629 |
| H1.526101 0.379796  | 4.434201  | O0.277159 1.658231  | 2.370052  |
| H0.622979-1.137604  | 4.466383  | H-0.5240442.083152  | 2.691351  |
| C1.552596-2.176517  | 2.097862  | H-0.837884-1.509915 | -0.054881 |
| H0.647045-2.695179  | 2.421238  | O-2.171009-2.196824 | 0.929793  |
| H1.634983-2.286412  | 1.017580  | H-2.071746-1.647007 | 1.717574  |
| H2.401979-2.694198  | 2.549905  | H-1.940731-3.086281 | 1.215485  |

**I-13-2H2O:**

E = -1272.4695356907 au

ZPE = 0.30332481 au

G<sub>corr</sub> = 0.25671836 au

|                     |           |                     |           |
|---------------------|-----------|---------------------|-----------|
| C0.387439 0.255904  | 0.182844  | C0.043292 2.728133  | -0.077073 |
| P-0.041592-0.055925 | 1.993274  | C-2.4024282.352708  | -1.270350 |
| H1.444734 0.538006  | 0.137915  | H-2.0648260.258732  | -1.093341 |
| C1.219808-1.307059  | 2.565588  | C-0.7310663.798522  | -0.475691 |
| O0.224701-0.891990  | -0.589461 | H1.010222 2.900297  | 0.376200  |
| C2.637567-1.000322  | 2.091675  | C-1.9659583.648673  | -1.076536 |
| H3.338091-1.707301  | 2.543857  | H-2.5555374.500677  | -1.387307 |
| H2.737022-1.096749  | 1.010020  | F-0.2670125.039499  | -0.280040 |
| H2.957394 0.002714  | 2.377420  | F-3.5926052.167220  | -1.856364 |
| C1.167960-1.282566  | 4.097551  | O0.583455 1.332562  | 2.650255  |
| H1.820170-2.063613  | 4.495649  | H-0.1015761.838311  | 3.097679  |
| H1.506243-0.330430  | 4.505654  | H-0.628887-1.345522 | -0.399322 |
| H0.160536-1.474596  | 4.474010  | O-2.086200-2.203478 | -0.133842 |
| C0.786294-2.693329  | 2.082179  | H-2.426791-0.523162 | 2.215847  |
| H-0.237286-2.927172 | 2.383151  | H-1.905766-3.105929 | 0.143180  |
| H0.855863-2.791688  | 1.000441  | O-3.282625-0.878234 | 1.920065  |
| H1.436809-3.451277  | 2.525188  | H-2.606878-1.800174 | 0.593947  |
| C-0.4309071.435157  | -0.285117 | H-3.757075-0.116661 | 1.573155  |
| C-1.6707251.245218  | -0.890577 |                     |           |

**TS(I-13→8<sup>+</sup>):**

E = -1119.4960609157 au

ZPE = 0.20359628 au

G<sub>corr</sub> = 0.24633843 au

$\nu = -1874.91 \text{ cm}^{-1}$

|                    |           |                     |           |
|--------------------|-----------|---------------------|-----------|
| C-1.0210060.728827 | -0.444798 | H1.228443-0.426897  | 2.280008  |
| P0.850617 0.772811 | -0.288272 | H1.134629 0.925193  | 3.403298  |
| H-1.4441010.644150 | 0.561323  | C-1.432118-0.478541 | -1.235931 |
| C1.237414 1.547515 | 1.344209  | C-1.771427-0.376174 | -2.579553 |
| O-1.4564971.953798 | -0.964880 | C-1.432128-1.720996 | -0.608154 |
| H-0.8975652.213791 | -1.705793 | C-2.106624-1.527601 | -3.266298 |
| C2.755785 1.732448 | 1.390081  | H-1.7953770.574972  | -3.093652 |
| H3.042568 2.153017 | 2.356223  | C-1.777074-2.836093 | -1.341320 |
| H3.282598 0.785556 | 1.269397  | H-1.180253-1.820132 | 0.439842  |
| H3.102077 2.415814 | 0.613038  | C-2.120140-2.776611 | -2.679460 |
| C0.534413 2.893696 | 1.494542  | H-2.390882-3.663668 | -3.236171 |
| H0.837370 3.352685 | 2.438110  | F-1.786726-4.029980 | -0.737014 |
| H0.801278 3.583890 | 0.692700  | F-2.437949-1.430123 | -4.559576 |
| H-0.5511512.799446 | 1.512388  | O1.493469-0.685528  | -0.375762 |
| C0.796855 0.564053 | 2.429587  | H1.731134 0.317004  | -1.363343 |
| H-0.2882880.461993 | 2.482801  |                     |           |

TS(I-13→8')·H2O:

E = -1195.9746104548 au

ZPE = 0.22761476 au

G<sub>corr</sub> = 0.27188790 au

$\nu = -1480.15 \text{ cm}^{-1}$

|                     |           |                    |           |
|---------------------|-----------|--------------------|-----------|
| C0.038521 0.056657  | -0.053395 | H3.850181-0.553831 | 2.055081  |
| P0.182762 0.190455  | 1.815521  | C-0.6911881.263248 | -0.572347 |
| H1.040069 0.037385  | -0.493620 | C-2.0547261.214969 | -0.838119 |
| C1.712156-0.745304  | 2.281892  | C0.008882 2.454088 | -0.743556 |
| O-0.571144-1.165655 | -0.377155 | C-2.6865522.364381 | -1.273031 |
| H-1.277374-1.350984 | 0.252179  | H-2.6261570.303389 | -0.727298 |
| C1.773157-0.716227  | 3.811834  | C-0.6709373.568952 | -1.183713 |
| H2.666469-1.242874  | 4.155624  | H1.071112 2.510547 | -0.544827 |
| H1.820321 0.303540  | 4.195210  | C-2.0264453.561987 | -1.458058 |
| H0.907580-1.208461  | 4.260233  | H-2.5407924.448031 | -1.805154 |
| C1.627610-2.191107  | 1.796466  | F0.004433 4.712287 | -1.358129 |
| H2.489219-2.749643  | 2.169901  | F-4.0000492.316803 | -1.531891 |
| H0.728982-2.692105  | 2.161695  | O0.330795 1.685903 | 2.253699  |
| H1.636170-2.266702  | 0.709495  | H-0.9267451.694422 | 2.993647  |
| C2.945197-0.051200  | 1.705004  | O-1.7997981.162144 | 3.303515  |
| H2.963636-0.080226  | 0.614158  | H-1.7371421.008506 | 4.256024  |
| H3.001574 0.991739  | 2.017619  | H-1.2955270.203556 | 2.718640  |

TS(I-13→8')·2H2O:

E = -1272.4190702619 au

ZPE = 0.29488811 au

G<sub>corr</sub> = 0.24818802 au

$\nu = -1145.76 \text{ cm}^{-1}$

|                    |           |                     |           |
|--------------------|-----------|---------------------|-----------|
| C0.187119 0.128217 | 0.007454  | O-0.232302-1.066708 | -0.450927 |
| P0.090642 0.078616 | 1.882758  | H-1.386762-1.667403 | -0.008507 |
| H1.244811 0.348027 | -0.235753 | C1.314224-0.992028  | 4.066347  |
| C1.367917-1.082117 | 2.537016  | H2.011615-1.718096  | 4.489772  |

|                    |           |                     |           |
|--------------------|-----------|---------------------|-----------|
| H1.598025-0.007141 | 4.435177  | C-0.8328283.698051  | -0.745329 |
| H0.320734-1.228708 | 4.452695  | H0.956547 2.766564  | -0.040152 |
| C1.012850-2.507489 | 2.104848  | C-2.1342463.572919  | -1.194883 |
| H1.727620-3.199569 | 2.555250  | H-2.7171514.432883  | -1.496253 |
| H0.017672-2.801214 | 2.444348  | F-0.2971524.925060  | -0.689131 |
| H1.050965-2.627657 | 1.024917  | F-3.9013712.131820  | -1.692262 |
| C2.760874-0.706387 | 2.033321  | O0.594121 1.510973  | 2.499146  |
| H2.843974-0.804297 | 0.950448  | H-0.1285562.137053  | 2.621886  |
| H3.038912 0.311462 | 2.308197  | O-2.578771-0.951126 | 2.468716  |
| H3.497768-1.378921 | 2.478119  | H-1.433892-0.394344 | 2.333671  |
| C-0.6201931.339147 | -0.427815 | H-3.265938-0.278758 | 2.380069  |
| C-1.9235901.173041 | -0.883694 | O-2.284426-2.142896 | 0.339521  |
| C-0.0663582.617226 | -0.362231 | H-2.567227-1.521321 | 1.577469  |
| C-2.6454862.291137 | -1.252433 | H-2.084989-3.077387 | 0.450464  |
| H-2.3655260.190060 | -0.970686 |                     |           |

***l-8'***:

E = -1119.6006095286 au

ZPE = 0.25090165 au

G<sub>corr</sub> = 0.20826203 au

|                     |           |                     |           |
|---------------------|-----------|---------------------|-----------|
| C-0.017297-0.625738 | -0.360699 | H2.334660 2.228345  | -0.240448 |
| P1.845231-0.654782  | -0.260056 | H2.555386 2.577796  | -1.949572 |
| H-0.3512810.333718  | -0.766584 | C-0.577105-0.788736 | 1.028944  |
| C2.549199 0.468031  | -1.522476 | C-0.895842-2.047853 | 1.521873  |
| O-0.397597-1.631027 | -1.253213 | C-0.7199830.336817  | 1.835396  |
| H0.224183-2.369065  | -1.177917 | C-1.359363-2.148660 | 2.819652  |
| C4.072552 0.384930  | -1.382320 | H-0.805981-2.937903 | 0.914479  |
| H4.539984 1.043272  | -2.117227 | C-1.1840070.176466  | 3.124771  |
| H4.410581 0.703186  | -0.394071 | H-0.4847141.326969  | 1.464023  |
| H4.440257-0.626002  | -1.558000 | C-1.514941-1.057626 | 3.651555  |
| C2.120980 0.005840  | -2.915438 | H-1.882901-1.163003 | 4.663304  |
| H2.597994 0.636814  | -3.667874 | F-1.3288391.257667  | 3.898310  |
| H2.422009-1.024259  | -3.108319 | F-1.672909-3.358011 | 3.297100  |
| H1.042858 0.077570  | -3.062785 | O2.286786-2.091450  | -0.348201 |
| C2.074384 1.894581  | -1.247049 | H2.141455 0.001535  | 0.956431  |
| H0.997116 2.010071  | -1.375976 |                     |           |

***u-8'***:

E = -1119.6003964095 au

ZPE = 0.25109331 au

G<sub>corr</sub> = 0.20928455 au

|                     |           |                     |           |
|---------------------|-----------|---------------------|-----------|
| C0.041387-0.173653  | -0.021327 | C-0.494982-2.758528 | 2.485765  |
| P-0.030262-0.100572 | 1.832858  | H-0.179679-3.621200 | 3.076261  |
| H1.088596-0.277653  | -0.317044 | H-1.468440-2.438872 | 2.858211  |
| C0.551160-1.651703  | 2.618698  | H-0.618774-3.093939 | 1.456852  |
| O-0.3887201.083767  | -0.482827 | C1.882723-2.069043  | 1.995316  |
| H-1.2185791.316805  | -0.048372 | H1.772247-2.386972  | 0.957993  |
| C0.750578-1.311727  | 4.101290  | H2.624212-1.267846  | 2.029624  |
| H1.096269-2.201454  | 4.631233  | H2.294305-2.914753  | 2.549742  |
| H1.499510-0.530797  | 4.246062  | C-0.751779-1.320961 | -0.588214 |
| H-0.177665-0.984570 | 4.570786  | C-0.097847-2.333502 | -1.280529 |

|                     |           |                     |           |
|---------------------|-----------|---------------------|-----------|
| C-2.133948-1.370812 | -0.418918 | H-2.770651-4.309679 | -2.021955 |
| C-0.837904-3.390047 | -1.776520 | F-4.149415-2.502536 | -0.775338 |
| H0.972948-2.302382  | -1.436971 | F-0.206892-4.364287 | -2.440122 |
| C-2.823719-2.445484 | -0.940050 | O-1.3822720.391534  | 2.275463  |
| H-2.669283-0.607753 | 0.130113  | H1.0392160.787380   | 2.102333  |
| C-2.206490-3.477171 | -1.623157 |                     |           |

TS(I-13→14):

E = -1119.524650408672 au

ZPE = 0.24610199 au

G<sub>corr</sub> = 0.20407300 au

$\nu = -1397.78 \text{ cm}^{-1}$

|                     |          |                     |           |
|---------------------|----------|---------------------|-----------|
| C-1.2805080.228170  | 0.403274 | H0.528357 2.710870  | 3.432795  |
| P0.519002 0.719231  | 0.283651 | C-1.601660-0.872336 | -0.572395 |
| H-1.538352-0.093565 | 1.425528 | C-2.129750-0.552990 | -1.816613 |
| C1.128728 1.328276  | 1.913365 | C-1.336699-2.200299 | -0.242394 |
| O-1.6617401.487335  | 0.074016 | C-2.388803-1.577762 | -2.706392 |
| C1.299623 0.148381  | 2.873232 | H-2.3442170.475047  | -2.074848 |
| H1.660304 0.521571  | 3.833986 | C-1.612793-3.181691 | -1.170358 |
| H0.355725-0.367380  | 3.057037 | H-0.932921-2.465877 | 0.727446  |
| H2.023729-0.581049  | 2.512045 | C-2.141024-2.905507 | -2.419028 |
| C2.473810 2.023903  | 1.674915 | H-2.353194-3.691205 | -3.131645 |
| H2.838552 2.423234  | 2.623402 | F-1.363499-4.459887 | -0.857223 |
| H3.232842 1.343130  | 1.290920 | F-2.904343-1.276346 | -3.905443 |
| H2.379698 2.860128  | 0.980173 | O1.692105-0.342219  | -0.101491 |
| C0.130159 2.333316  | 2.488764 | H1.588534-0.703437  | -0.991409 |
| H-0.0245643.185995  | 1.828470 | H-0.3038261.781070  | -0.451548 |
| H-0.8408691.885862  | 2.696302 |                     |           |

TS(I-13→I-14)-H2O:

E = -1195.9761153677 au

ZPE = 0.26911342 au

G<sub>corr</sub> = 0.22504011 au

$\nu = -1324.31 \text{ cm}^{-1}$

|                     |           |                     |           |
|---------------------|-----------|---------------------|-----------|
| C0.050073-0.011974  | -0.043426 | C-0.7697991.170708  | -0.517444 |
| P0.021925 0.000522  | 1.839543  | C-2.0865580.982279  | -0.920064 |
| H1.093663 0.161502  | -0.356294 | C-0.2100142.446713  | -0.533729 |
| C1.564986-0.730303  | 2.508322  | C-2.8155402.081325  | -1.331184 |
| O-0.408410-1.239064 | -0.409819 | H-2.532723-0.002675 | -0.926652 |
| C2.771705 0.130267  | 2.131701  | C-0.9837573.507494  | -0.955667 |
| H3.675152-0.326879  | 2.540234  | H0.820287 2.609305  | -0.241835 |
| H2.905011 0.202819  | 1.051521  | C-2.2974383.361126  | -1.361555 |
| H2.702143 1.139273  | 2.537431  | H-2.8866054.205527  | -1.693324 |
| C1.421592-0.810441  | 4.031589  | F-0.4450564.733385  | -0.980704 |
| H2.314769-1.280010  | 4.448523  | F-4.0838291.903940  | -1.722824 |
| H1.321435 0.173414  | 4.489256  | O0.026389 1.500664  | 2.460232  |
| H0.562623-1.414822  | 4.327717  | H-0.8328641.937941  | 2.411037  |
| C1.710817-2.139561  | 1.926916  | H-1.292686-1.650232 | 0.370152  |
| H0.857145-2.774429  | 2.168658  | O-2.008587-1.865324 | 1.258575  |
| H1.830987-2.134796  | 0.844741  | H-1.214335-0.917168 | 1.989862  |
| H2.598294-2.604266  | 2.360379  | H-1.806348-2.748745 | 1.585541  |

TS(**I-13**→**I-14**)-2H<sub>2</sub>O:

E = -1272.4190460634 au

ZPE = 0.29486080 au

G<sub>corr</sub> = 0.24931465 au

v = -1144.91 cm<sup>-1</sup>

|            |           |           |            |           |           |
|------------|-----------|-----------|------------|-----------|-----------|
| C0.306787  | 0.165230  | 0.064573  | C0.070686  | 2.676562  | -0.121662 |
| P-0.000003 | -0.036150 | 1.906391  | C-2.378335 | 2.424570  | -1.341967 |
| H1.383269  | 0.403577  | -0.038760 | H-2.109838 | 0.307441  | -1.207737 |
| C1.188026  | -1.268679 | 2.597813  | C-0.656621 | 3.785203  | -0.501532 |
| O-0.047766 | -0.988970 | -0.532048 | H1.045552  | 2.799386  | 0.333127  |
| C2.629088  | -0.891734 | 2.256643  | C-1.892911 | 3.697385  | -1.114192 |
| H3.309047  | -1.605787 | 2.726703  | H-2.445268 | 4.579255  | -1.409733 |
| H2.815985  | -0.923967 | 1.182842  | F-0.145914 | 5.003557  | -0.276984 |
| H2.893913  | 0.101096  | 2.621678  | F-3.569984 | 2.301807  | -1.942733 |
| C0.988383  | -1.282206 | 4.117583  | O0.442782  | 1.333221  | 2.689798  |
| H1.625464  | -2.055634 | 4.551986  | H-0.287490 | 1.952927  | 2.798386  |
| H1.256782  | -0.333803 | 4.581126  | H-1.243049 | -1.618390 | -0.271920 |
| H-0.042578 | -1.516606 | 4.390686  | O-2.171785 | -2.114823 | -0.065893 |
| C0.852916  | -2.653097 | 2.035843  | H-1.569579 | -0.518879 | 2.138111  |
| H-0.173980 | -2.947079 | 2.261485  | H-1.979020 | -3.054400 | 0.007998  |
| H0.990322  | -2.699714 | 0.958341  | O-2.725513 | -1.068496 | 2.089502  |
| H1.511661  | -3.389917 | 2.500514  | H-2.604105 | -1.576363 | 1.169581  |
| C-0.456444 | -1.407932 | -0.361366 | H-3.392561 | -0.382477 | 1.960318  |
| C-1.693168 | -1.279925 | -0.984675 |            |           |           |

**I-14:**

E = -1119.5532219341 au

ZPE = 0.24837183 au

G<sub>corr</sub> = 0.20535447 au

|            |           |          |            |           |           |
|------------|-----------|----------|------------|-----------|-----------|
| C-1.626640 | 0.018326  | 0.554422 | H0.723061  | 1.350948  | 4.114813  |
| P0.211822  | 0.166298  | 0.639529 | C-1.945680 | -1.071316 | -0.455687 |
| H-1.985031 | -0.336547 | 1.546853 | C-2.280882 | -0.699692 | -1.749857 |
| C0.821253  | 1.275507  | 1.969746 | C-1.879046 | -2.417676 | -0.101043 |
| O-1.855884 | 1.273193  | 0.214008 | C-2.546292 | -1.693565 | -2.671643 |
| C2.355106  | 1.261469  | 1.925769 | H-2.340738 | 0.347173  | -2.016098 |
| H2.723412  | 1.963980  | 2.675444 | C-2.150356 | -3.367566 | -1.063971 |
| H2.776916  | 0.284495  | 2.153963 | H-1.649550 | -2.720504 | 0.914333  |
| H2.739859  | 1.586668  | 0.957525 | C-2.487397 | -3.039399 | -2.364970 |
| C0.329585  | 2.708137  | 1.756214 | H-2.701886 | -3.800169 | -3.103528 |
| H0.764516  | 3.336486  | 2.536282 | F-2.094230 | -4.663689 | -0.731903 |
| H0.649423  | 3.107902  | 0.793332 | F-2.876325 | -1.345464 | -3.921881 |
| H-0.752254 | -2.781475 | 1.809249 | O1.140764  | -1.153376 | 0.839736  |
| C0.319855  | 0.733042  | 3.310618 | H0.915073  | -1.870098 | 0.231346  |
| H-0.767609 | -0.771457 | 3.383536 | H0.548387  | 0.733034  | -0.596953 |
| H0.642822  | -0.292659 | 3.491626 |            |           |           |

**u-14:**

E = -1119.5529407666 au

ZPE = 0.24863562 au

G<sub>corr</sub> = 0.20627123 au



|                     |           |                     |           |
|---------------------|-----------|---------------------|-----------|
| C0.139465-0.167056  | 0.118224  | H-3.261975-1.629881 | 2.989710  |
| P-0.013111-0.124330 | 1.955352  | C-0.502890-1.417093 | -0.456508 |
| H1.229588-0.239132  | -0.107912 | C0.068618-2.671803  | -0.259377 |
| C-1.719975-0.183164 | 2.641905  | C-1.670248-1.285263 | -1.193367 |
| O-0.4592180.995922  | -0.075301 | C-0.562585-3.775363 | -0.791556 |
| C-1.5930590.181229  | 4.129188  | H0.990648-2.789814  | 0.297256  |
| H-2.5929470.182226  | 4.566813  | C-2.257140-2.424740 | -1.709325 |
| H-0.989826-0.530747 | 4.690239  | H-2.103938-0.307170 | -1.352627 |
| H-1.1738511.178712  | 4.271591  | C-1.734107-3.689036 | -1.523443 |
| C-2.6470100.824779  | 1.962738  | H-2.211193-4.568500 | -1.934737 |
| H-3.6089550.793477  | 2.479121  | F-3.385325-2.305423 | -2.422047 |
| H-2.2650991.842721  | 2.027704  | F-0.024516-4.987456 | -0.599886 |
| H-2.8132160.593997  | 0.914889  | O0.737133-1.226903  | 2.891908  |
| C-2.286258-1.600137 | 2.501099  | H1.687382-1.283500  | 2.730274  |
| H-2.432052-1.882276 | 1.459307  | H0.528733 1.119896  | 2.295479  |
| H-1.658523-2.352407 | 2.977271  |                     |           |

TS(/-14→15+C<sub>6</sub>H<sub>3</sub>F<sub>2</sub>CHO):

E = -1195.9924651488 au

ZPE = 0.27228053 au

G<sub>corr</sub> = 0.22603643 au

$\nu$  = -191.03 cm<sup>-1</sup>

|                     |          |                     |           |
|---------------------|----------|---------------------|-----------|
| C-2.0530050.194992  | 0.481168 | C-2.116460-0.947542 | -0.500643 |
| P0.156759 0.173820  | 0.679674 | C-2.212221-0.685838 | -1.861627 |
| H-2.281137-0.150484 | 1.505421 | C-2.081065-2.259387 | -0.030728 |
| C0.920177 1.215381  | 1.986457 | C-2.261899-1.757326 | -2.731328 |
| O-2.3709421.361021  | 0.134330 | H-2.2490580.329179  | -2.234622 |
| C2.437231 1.267955  | 1.801534 | C-2.138583-3.290754 | -0.946926 |
| H2.868084 1.915919  | 2.568546 | H-2.046486-2.472166 | 1.032072  |
| H2.899794 0.286355  | 1.901580 | C-2.225681-3.073259 | -2.309286 |
| H2.712264 1.679535  | 0.829322 | H-2.271580-3.894653 | -3.011725 |
| C0.319204 2.616221  | 1.830429 | F-2.115762-4.552241 | -0.505123 |
| H0.774487 3.279197  | 2.568538 | F-2.352117-1.519539 | -4.043549 |
| H0.509830 3.037310  | 0.842200 | O0.972642-1.236020  | 0.763385  |
| H-0.7581732.622692  | 1.994263 | H0.457541-1.978073  | 0.418283  |
| C0.561292 0.627543  | 3.351567 | H-1.4414242.340257  | -1.033356 |
| H-0.5183740.585388  | 3.505679 | O-0.8803542.877371  | -1.621446 |
| H0.964079-0.377144  | 3.482664 | H0.594326 0.801294  | -0.507501 |
| H0.980965 1.256665  | 4.138883 | H-1.0794673.784018  | -1.378434 |

15:

E = -575.5757446199 au

ZPE = 0.11787611 au

G<sub>corr</sub> = 0.14974734 au

|                    |          |                    |          |
|--------------------|----------|--------------------|----------|
| P0.025602 0.207114 | 0.634949 | C0.282696 2.618709 | 1.846817 |
| C0.878463 1.213397 | 1.948949 | H0.713880 3.264316 | 2.615625 |
| C2.390500 1.266892 | 1.750121 | H0.492521 3.080156 | 0.879150 |
| H2.854072 1.866026 | 2.538940 | H-0.7999322.616062 | 1.990649 |
| H2.838725 0.273639 | 1.786251 | C0.548565 0.601620 | 3.310629 |
| H2.653448 1.720450 | 0.792619 | H-0.5281640.565935 | 3.488050 |

|                    |          |                    |           |
|--------------------|----------|--------------------|-----------|
| H0.937391-0.414334 | 3.399371 | H0.366335-1.949265 | 0.756857  |
| H0.996873 1.195295 | 4.111115 | H0.624243 0.874545 | -0.466507 |
| O0.934629-1.189324 | 0.602124 |                    |           |

15·H2O:

E = -652.0030226689 au  
ZPE = 0.17486405 au  
G<sub>corr</sub> = 0.13957846 au

|                    |          |                     |           |
|--------------------|----------|---------------------|-----------|
| P-0.0240900.367210 | 0.080214 | C-0.885858-1.059947 | 2.270990  |
| C0.004753 0.134830 | 1.929604 | H-1.908988-0.915716 | 1.917417  |
| C1.416291-0.097504 | 2.460087 | H-0.504811-1.982743 | 1.829364  |
| H1.396600-0.240894 | 3.544346 | H-0.927217-1.207674 | 3.353138  |
| H1.870998-0.984873 | 2.018870 | O0.875693-0.903169  | -0.475718 |
| H2.067847 0.753121 | 2.250851 | H0.308890-1.464991  | -1.048837 |
| C-0.5813971.414078 | 2.527734 | H0.970733 1.381948  | 0.051094  |
| H-0.6261841.335053 | 3.616758 | O-0.834053-2.333894 | -1.990654 |
| H0.027531 2.289348 | 2.289707 | H-1.539377-2.664553 | -1.426425 |
| H-1.5959381.604473 | 2.170776 | H-1.269011-1.715503 | -2.585593 |

15·2H2O:

E = -728.4608573025 au  
ZPE = 0.19983544 au  
G<sub>corr</sub> = 0.16066210 au

|                    |           |                     |           |
|--------------------|-----------|---------------------|-----------|
| P-0.0371700.420185 | 0.220598  | H1.548957-0.281250  | -2.170419 |
| C1.729139 0.029440 | -0.018601 | H2.919752-1.093145  | -1.419471 |
| C2.496067 1.343992 | -0.167138 | O-0.7167001.166659  | -0.905033 |
| H3.555041 1.133025 | -0.327467 | H-1.2022710.316268  | -2.347286 |
| H2.140656 1.924160 | -1.019353 | H-0.0737751.099828  | 1.454580  |
| H2.414899 1.967064 | 0.725565  | O-1.451104-0.277142 | -3.085165 |
| C2.204901-0.740929 | 1.213014  | H-1.253515-1.868293 | -2.231722 |
| H3.265763-0.975169 | 1.107145  | H-2.394076-0.139419 | -3.207208 |
| H2.088954-0.162119 | 2.131499  | H-0.622619-0.819796 | 0.548572  |
| H1.673009-1.686038 | 1.336297  | O-1.175830-2.668823 | -1.680220 |
| C1.871337-0.822777 | -1.280436 | H-1.888085-2.590763 | -1.042585 |
| H1.289957-1.743663 | -1.219447 |                     |           |

15·3H2O:

E = -804.8916390709 au  
ZPE = 0.22718892 au  
G<sub>corr</sub> = 0.18693597 au

|                     |           |                     |           |
|---------------------|-----------|---------------------|-----------|
| P0.447014 0.428354  | -0.128063 | C-0.892038-1.316590 | 1.516194  |
| C-0.032904-0.054615 | 1.602954  | H-1.776960-1.163312 | 0.894425  |
| C1.185862-0.308979  | 2.484418  | H-0.331855-2.157109 | 1.102704  |
| H0.873759-0.611619  | 3.487889  | H-1.236471-1.609375 | 2.510886  |
| H1.814272-1.103448  | 2.080716  | O1.504326-0.731739  | -0.603168 |
| H1.800734 0.587352  | 2.585435  | H1.085602-1.309478  | -1.299323 |
| C-0.8598411.107267  | 2.154104  | H1.354835 1.459311  | 0.222465  |
| H-1.2042640.878362  | 3.165427  | O0.325737-2.225017  | -2.393752 |
| H-0.2780462.030268  | 2.209309  | H-2.500919-1.038188 | -1.900105 |
| H-1.7442701.303884  | 1.543634  | H0.496865-1.874952  | -3.272563 |

|                    |           |                     |           |
|--------------------|-----------|---------------------|-----------|
| H-1.6736830.796149 | -1.227248 | O-2.326689-1.987513 | -2.084280 |
| O-2.5827610.663291 | -1.549864 | H-0.653248-2.167571 | -2.275865 |
| H-2.6289191.159585 | -2.372602 | H-2.649265-2.463995 | -1.314841 |

TS(15→9<sup>+</sup>):

E = -575.4729542440 au  
 ZPE = 0.14451319 au  
 G<sub>corr</sub> = 0.11279587 au  
 v = -1915.90 cm<sup>-1</sup>

|                     |           |                     |           |
|---------------------|-----------|---------------------|-----------|
| P-0.621787-0.998347 | -1.224781 | H-1.8010091.398721  | 0.032599  |
| C-0.0211630.138554  | 0.090299  | C-0.339790-0.481849 | 1.448776  |
| C1.490657 0.270273  | -0.099504 | H-1.414790-0.596798 | 1.596465  |
| H1.909531 0.884611  | 0.700757  | H0.123614-1.462835  | 1.560060  |
| H1.988386-0.700174  | -0.063252 | H0.040846 0.158739  | 2.246945  |
| H1.740734 0.747487  | -1.048653 | O0.120874-2.415361  | -1.197787 |
| C-0.7184991.485970  | -0.076181 | H-1.300422-2.288534 | -1.206914 |
| H-0.3650072.181090  | 0.688218  | H-0.321556-0.257505 | -2.398154 |
| H-0.5106191.935961  | -1.048892 |                     |           |

TS(15→9<sup>+</sup>)-H2O:

E = -651.9521948260 au  
 ZPE = 0.16986939 au  
 G<sub>corr</sub> = 0.13624689 au  
 v = -1609.15 cm<sup>-1</sup>

|                    |          |                     |           |
|--------------------|----------|---------------------|-----------|
| P0.118178-0.131417 | 0.059127 | C-0.743297-1.241599 | 2.404099  |
| C0.018623-0.018084 | 1.896592 | H-1.757829-1.280861 | 2.002680  |
| C1.427967 0.011572 | 2.485182 | H-0.237598-2.169120 | 2.132204  |
| H1.378533 0.058780 | 3.576067 | H-0.818605-1.211433 | 3.493428  |
| H1.992304-0.882061 | 2.216311 | O0.944501-1.388000  | -0.404642 |
| H1.990471 0.881784 | 2.141576 | H-0.087058-1.890509 | -1.201698 |
| C-0.7361421.265553 | 2.238909 | H0.826244 1.065720  | -0.228759 |
| H-0.8292811.365541 | 3.322662 | O-1.107148-1.817276 | -1.586320 |
| H-0.2162212.153557 | 1.872972 | H-1.122670-0.748191 | -0.934199 |
| H-1.7443371.268565 | 1.819865 | H-1.054224-1.583918 | -2.522331 |

TS(15→9<sup>+</sup>)-2H2O:

E = -728.4105991832 au  
 ZPE = 0.19575852 au  
 G<sub>corr</sub> = 0.15954489 au  
 v = -892.30 cm<sup>-1</sup>

|                    |           |                     |           |
|--------------------|-----------|---------------------|-----------|
| P0.025275 0.080092 | -0.208301 | C2.396461-0.710576  | -1.330060 |
| C1.871463-0.007054 | -0.079034 | H2.005540-1.726929  | -1.415175 |
| C2.454992 1.400296 | 0.015592  | H2.121024-0.169145  | -2.236536 |
| H3.546951 1.359453 | 0.055931  | H3.486867-0.777156  | -1.301400 |
| H2.176214 2.004730 | -0.848375 | O-0.3873551.028993  | -1.382587 |
| H2.109791 1.918404 | 0.912680  | H-1.2458630.269049  | -2.312011 |
| C2.212675-0.816836 | 1.169719  | H-0.2256980.737661  | 1.033763  |
| H3.296119-0.912914 | 1.274944  | O-1.835964-0.418300 | -2.823847 |
| H1.837829-0.339097 | 2.077749  | H-1.780626-1.504243 | -1.945958 |
| H1.796790-1.825865 | 1.125397  | H-2.724806-0.048858 | -2.844638 |

|                     |           |                     |           |
|---------------------|-----------|---------------------|-----------|
| H-0.866742-1.482252 | -0.541299 | H-2.345624-2.340089 | -0.631906 |
| O-1.542023-2.188067 | -1.148927 |                     |           |

TS(15→9')·3H<sub>2</sub>O:

E = -804.8571306167 au  
 ZPE = 0.22184335 au  
 G<sub>corr</sub> = 0.18364094 au  
 ν = -388.34 cm<sup>-1</sup>

|                     |           |                     |           |
|---------------------|-----------|---------------------|-----------|
| P0.210018 0.249800  | -0.084894 | H-1.045401-1.520189 | 2.955181  |
| C-0.049613-0.028363 | 1.734574  | O1.154423-0.855404  | -0.650587 |
| C1.293129-0.176162  | 2.443914  | H0.550766-1.808015  | -1.629248 |
| H1.146865-0.382285  | 3.508066  | H0.960875 1.462449  | 0.031164  |
| H1.875136-0.996590  | 2.022266  | O0.121698-2.432285  | -2.320080 |
| H1.890703 0.734230  | 2.362155  | H-2.371894-0.472760 | -2.111594 |
| C-0.8204901.169789  | 2.282913  | H0.657707-2.347535  | -3.113780 |
| H-1.0235291.038897  | 3.348895  | H-1.4496380.471856  | -0.963451 |
| H-0.2578932.099356  | 2.169662  | O-2.4039570.452901  | -1.527734 |
| H-1.7822531.297896  | 1.780443  | H-2.3951951.204369  | -2.136995 |
| C-0.871246-1.306874 | 1.897399  | O-2.233837-1.623289 | -2.777286 |
| H-1.847192-1.223270 | 1.413305  | H-1.285581-1.980887 | -2.618005 |
| H-0.357340-2.167768 | 1.466159  | H-2.841917-2.287181 | -2.434125 |

9':

E = -575.5757446199 au  
 ZPE = 0.14913877 au  
 G<sub>corr</sub> = 0.11757165 au

|                    |          |                     |           |
|--------------------|----------|---------------------|-----------|
| P0.703791-0.309908 | 0.839848 | H-1.0842881.810265  | 1.802415  |
| C0.983436 1.115626 | 1.949531 | C0.851002 0.631941  | 3.393914  |
| C2.390753 1.654880 | 1.691835 | H-0.1468560.240668  | 3.601557  |
| H2.588685 2.499824 | 2.354366 | H1.575543-0.149625  | 3.624898  |
| H3.152902 0.898161 | 1.880818 | H1.028313 1.463649  | 4.078660  |
| H2.509456 2.006072 | 0.664933 | O1.638328-1.474482  | 0.991285  |
| C-0.0696972.176811 | 1.634526 | H-0.665146-0.604923 | 1.034243  |
| H0.075965 3.042334 | 2.283866 | H0.679874 0.281829  | -0.444002 |
| H-0.0022112.528110 | 0.603020 |                     |           |

TS(4a'+HCl·OMe<sub>2</sub>→17+Me<sub>2</sub>O):

E = -1658.9024341321 au  
 ZPE = 0.27348297 au  
 G<sub>corr</sub> = 0.32080483 au  
 ν = -225.75 cm<sup>-1</sup>

|                    |          |                    |           |
|--------------------|----------|--------------------|-----------|
| C0.511535-0.133438 | 0.581481 | C4.210416 1.900518 | 1.070869  |
| O0.6471090.122282  | 1.967094 | H4.559617 2.935633 | 1.070244  |
| P2.184383 0.066663 | 1.166663 | H4.613139 1.419871 | 1.965600  |
| H0.055732 0.671205 | 0.003370 | H4.625228 1.397852 | 0.198818  |
| C2.678529 1.878579 | 1.057554 | C2.154106 2.566698 | -0.198559 |
| C2.162345 2.597201 | 2.306357 | H2.470455 2.039793 | -1.097579 |
| H2.550044 3.618847 | 2.311648 | H1.065420 2.636149 | -0.202433 |
| H1.075362 2.654703 | 2.331018 | H2.541339 3.588223 | -0.244218 |
| H2.496807 2.117439 | 3.228437 | C0.066046-1.492638 | 0.190023  |

|                     |           |                    |           |
|---------------------|-----------|--------------------|-----------|
| C-0.326242-2.418941 | 1.151129  | H3.416686-1.739897 | 0.818124  |
| C0.078804-1.840379  | -1.159422 | O3.856340-2.638761 | 0.947045  |
| C-0.713596-3.678124 | 0.732698  | C5.296514-2.507016 | 0.770649  |
| H-0.340449-2.163886 | 2.202022  | H5.513808-2.269483 | -0.266525 |
| C-0.314741-3.111748 | -1.515915 | H5.614380-1.705165 | 1.428885  |
| H0.415748-1.137036  | -1.909023 | H5.738510-3.449497 | 1.075772  |
| C-0.716624-4.062597 | -0.593470 | C3.215026-3.629764 | 0.092429  |
| H-1.022673-5.054625 | -0.897567 | H2.155891-3.597290 | 0.326661  |
| F-0.301058-3.455186 | -2.810183 | H3.392664-3.377735 | -0.948871 |
| F-1.103781-4.570180 | 1.652540  | H3.634827-4.593772 | 0.358923  |
| Cl3.469583-0.552391 | -1.267589 |                    |           |

17:

E = -1503.9266567044 au

ZPE = 0.19404210 au

G<sub>corr</sub> = 0.23658120 au

|                    |           |                     |           |
|--------------------|-----------|---------------------|-----------|
| C0.419892-0.160673 | 0.237691  | H1.106543 2.857313  | -0.067994 |
| O0.648947 0.189113 | 1.602039  | H2.592166 3.792614  | 0.024465  |
| P2.100692 0.152204 | 0.644062  | C-0.014422-1.549352 | -0.057756 |
| H-0.0998270.594162 | -0.358434 | C-0.181881-2.470493 | 0.969179  |
| C2.772115 1.857775 | 0.934010  | C-0.229812-1.916131 | -1.383354 |
| C2.354600 2.319235 | 2.332808  | C-0.573420-3.753472 | 0.638765  |
| H2.809956 3.293840 | 2.516469  | H-0.020342-2.196216 | 2.002839  |
| H1.277971 2.430607 | 2.432891  | C-0.614205-3.212882 | -1.651539 |
| H2.707291 1.641930 | 3.111960  | H-0.100684-1.204991 | -2.189008 |
| C4.300849 1.829643 | 0.861139  | C-0.796558-4.161097 | -0.661450 |
| H4.670765 2.809885 | 1.166167  | H-1.101783-5.172328 | -0.894891 |
| H4.730725 1.092800 | 1.541762  | F-0.822780-3.575405 | -2.922066 |
| H4.670828 1.630722 | -0.140563 | F-0.745990-4.645393 | 1.621022  |
| C2.193586 2.788531 | -0.131092 | Cl3.252150-0.325479 | -1.221052 |
| H2.465610 2.473562 | -1.137999 | H2.755871-0.864159  | 1.336901  |

TS(17→16'+C<sub>6</sub>H<sub>3</sub>F<sub>2</sub>CHO):

E = -1503.9085645089 au

ZPE = 0.19231871 au

G<sub>corr</sub> = 0.23489300 au

$\nu$  = -136.29 cm<sup>-1</sup>

|                    |           |                     |           |
|--------------------|-----------|---------------------|-----------|
| C0.214715-0.104517 | 0.679058  | H2.699455 2.381664  | -1.295562 |
| O0.2028540.118627  | 1.951201  | H1.244977 2.785130  | -0.372307 |
| P2.140256 0.101897 | 0.478097  | H2.719705 3.719057  | -0.152569 |
| H-0.2217780.646399 | -0.010799 | C-0.093012-1.494154 | 0.164668  |
| C2.795671 1.803807 | 0.814642  | C-0.190741-2.537978 | 1.074096  |
| C2.265894 2.316775 | 2.156810  | C-0.268523-1.718167 | -1.197111 |
| H2.714346 3.296342 | 2.335060  | C-0.464609-3.802880 | 0.591792  |
| H1.185680 2.428400 | 2.164811  | H-0.064460-2.359523 | 2.133588  |
| H2.547637 1.665829 | 2.983878  | C-0.537602-3.001812 | -1.622343 |
| C4.324123 1.737096 | 0.872446  | H-0.203078-0.906586 | -1.911727 |
| H4.699211 2.730523 | 1.125628  | C-0.642582-4.071600 | -0.751394 |
| H4.673409 1.047668 | 1.642327  | H-0.859248-5.070438 | -1.106080 |
| H4.770806 1.450270 | -0.077786 | F-0.710806-3.230406 | -2.930036 |
| C2.332428 2.713402 | -0.324140 | F-0.565472-4.818227 | 1.458782  |

Cl3.181215-0.535497 -1.191985 H2.638385-0.745234 1.473925

**16'**:

E = -959.9266298127 au  
ZPE = 0.10432762 au  
G<sub>corr</sub> = 0.13664482 au

|                     |          |                     |           |
|---------------------|----------|---------------------|-----------|
| P0.014406-0.036144  | 0.047028 | H-0.3146742.137674  | 2.150262  |
| C-0.045682-0.009254 | 1.911077 | H-1.8229581.220408  | 2.186865  |
| C1.432194 0.021859  | 2.319144 | C-0.696629-1.303516 | 2.395463  |
| H1.507930-0.007371  | 3.408340 | H-1.744088-1.363583 | 2.096867  |
| H1.986560-0.834276  | 1.929659 | H-0.183793-2.186228 | 2.009261  |
| H1.931024 0.933065  | 1.982459 | H-0.661534-1.349875 | 3.486092  |
| C-0.7730011.203491  | 2.478606 | Cl-2.0021760.207181 | -0.467390 |
| H-0.7349251.179781  | 3.570636 | H0.388163 1.317396  | -0.129526 |

**4a''-NHC<sup>Me2</sup>:**

E = -1229.957666010 au  
ZPE = 0.270087350 au  
G<sub>corr</sub> = 0.22488112 au

|                     |           |                    |           |
|---------------------|-----------|--------------------|-----------|
| C0.057022-0.156420  | -0.128201 | H3.450081 1.304479 | 0.576674  |
| O-0.0096740.115538  | 1.235286  | H1.919978 2.027179 | 0.065702  |
| P1.680188-0.395110  | 0.598927  | C2.941282-0.829362 | -1.061786 |
| H-0.1020790.705900  | -0.792018 | N3.690302-1.944491 | -1.088920 |
| C2.375246 1.312647  | 0.752620  | C4.140054-2.211355 | -2.359142 |
| C-0.650935-1.364480 | -0.634140 | C3.650167-1.236482 | -3.151453 |
| C-1.222330-2.264537 | 0.259439  | N2.920430-0.404107 | -2.336524 |
| C-0.714533-1.611939 | -2.005031 | C4.031508-2.749862 | 0.066631  |
| C-1.834748-3.395582 | -0.240723 | H3.964737-3.804388 | -0.190221 |
| H-1.187715-2.074475 | 1.323466  | H5.042456-2.526837 | 0.403012  |
| C-1.333316-2.760829 | -2.448942 | H3.332275-2.533831 | 0.868893  |
| H-0.294570-0.913774 | -2.718482 | C2.263183 0.793286 | -2.811783 |
| C-1.907245-3.681112 | -1.591378 | H1.609190 0.556643 | -3.648838 |
| H-2.393297-4.574536 | -1.958762 | H1.667473 1.218926 | -2.013290 |
| F-1.388499-2.999842 | -3.767259 | H2.998295 1.528961 | -3.133186 |
| F-2.389177-4.263590 | 0.615951  | H4.757707-3.061639 | -2.592229 |
| H2.191958 1.667195  | 1.765231  | H3.754745-1.072758 | -4.210366 |

**TS(4a''-NHC<sup>Me2</sup>→18'')**:

E = -1229.958195202 au  
ZPE = 0.27006599 au  
G<sub>corr</sub> = 0.22613857 au  
 $\nu = -77.46 \text{ cm}^{-1}$

|                     |           |                     |           |
|---------------------|-----------|---------------------|-----------|
| C0.061392-0.140573  | -0.169798 | C-1.758127-3.422874 | -0.050590 |
| O-0.0807740.262119  | 1.136313  | H-1.293501-1.885209 | 1.379983  |
| P1.719954-0.300640  | 0.506990  | C-1.034950-3.069405 | -2.261209 |
| H-0.1058490.632193  | -0.941895 | H-0.001760-1.243080 | -2.667382 |
| C2.332492 1.440419  | 0.601950  | C-1.682027-3.885667 | -1.350972 |
| C-0.574196-1.426873 | -0.589671 | H-2.111754-4.833988 | -1.643420 |
| C-1.219421-2.218107 | 0.353615  | F-0.944671-3.484575 | -3.533934 |
| C-0.486731-1.853543 | -1.914947 | F-2.385876-4.188141 | 0.852928  |

|                    |           |                    |           |
|--------------------|-----------|--------------------|-----------|
| H2.190528 1.792273 | 1.621362  | H3.126059-3.924141 | -0.491317 |
| H3.396540 1.489223 | 0.369566  | H4.603191-3.137694 | 0.102236  |
| H1.796271 2.120531 | -0.059408 | H3.017644-2.638837 | 0.720320  |
| C2.873373-0.781695 | -1.088887 | C2.529754 1.105993 | -2.660909 |
| N3.444824-1.990103 | -1.206724 | H2.491899 1.187258 | -3.743468 |
| C3.926119-2.184061 | -2.476818 | H1.532086 1.271987 | -2.266362 |
| C3.640404-1.063270 | -3.171409 | H3.199726 1.868956 | -2.271077 |
| N2.992355-0.219819 | -2.304055 | H4.419675-3.091419 | -2.779263 |
| C3.557389-2.983938 | -0.155421 | H3.838122-0.803887 | -4.197169 |

18“:

E = -685.964911969 au

ZPE = 0.17255463 au

G<sub>corr</sub> = 0.13772435 au

|                     |           |                     |           |
|---------------------|-----------|---------------------|-----------|
| P-0.1884360.103328  | -0.136572 | H-2.987568-0.340549 | 2.038841  |
| C-0.120931-0.064786 | 1.685356  | H-2.4965941.363600  | 1.932924  |
| N1.051547-0.322721  | 2.293559  | H-2.8322210.633902  | 3.503156  |
| C0.889730-0.322871  | 3.653167  | C-1.981465-0.160607 | -0.522431 |
| C-0.414845-0.081194 | 3.892131  | H-2.350825-1.107976 | -0.125158 |
| N-1.0252660.077027  | 2.670939  | H-2.6356080.652345  | -0.216353 |
| C2.322475-0.403397  | 1.607862  | H-2.031271-0.224076 | -1.609862 |
| H3.084584-0.718326  | 2.314605  | P0.308122 2.181741  | -0.281892 |
| H2.569103 0.576245  | 1.196469  | C1.636726 2.040737  | -1.611922 |
| H2.263483-1.119167  | 0.790963  | H2.438742 1.345342  | -1.360382 |
| H1.707307-0.493731  | 4.331071  | H1.244659 1.763536  | -2.591455 |
| H-0.956722-0.008835 | 4.818684  | H2.090703 3.028249  | -1.717044 |
| C-2.4165920.450789  | 2.516826  |                     |           |

## 2 References

---

- <sup>1</sup> F. Neese, The ORCA program system. *Wiley Interdiscip. Rev. Comput. Mol. Sci.*, 2012, **2**, 73–78.
- <sup>2</sup> S. Grimme, J.G. Brandenburg, C. Bannwarth, A. Hansen, Consistent structures and interactions by density functional theory with small atomic orbital basis sets. *J. Chem. Phys.*, 2015, **143**, 54107.
- <sup>3</sup> V. Barone, M. Cossi, Quantum Calculation of Molecular Energies and Energy Gradients in Solution by a Conductor Solvent Model. *J. Phys. Chem. A*, 1998, **102**, 1995–2001.
- <sup>4</sup> Y. Zhao, G. Truhlar, Design of Density Functionals That Are Broadly Accurate for Thermochemistry, Thermochemical Kinetics, and Nonbonded Interactions, *J. Phys. Chem. A*, 2005, **109**, 5656-5657.
- <sup>5</sup> a) F. Weigend, M. Häser, H. Patzelt, R. Ahlrichs, RI-MP2: optimized auxiliary basis sets and demonstration of efficiency. *Chem. Phys. Lett.*, 1998, **294**, 143–152. b) F. Weigend, M. Häser, RI-MP2: first derivatives and global consistency. *Theor. Chem. Acc.*, 1997, **97**, 331–340. c) D.E. Bernholdt, R.J. Harrison, Large-scale correlated electronic structure calculations: the RI-MP2 method on parallel computers. *Chem. Phys. Lett.*, 1996, **250**, 477–484.
- <sup>6</sup> a) S. Grimme, J. Antony, S. Ehrlich, H. Krieg, A consistent and accurate *ab initio* parametrization of density functional dispersion correction (DFT-D) for the 94 elements H-Pu, *J. Chem. Phys.*, 2010, **132**, 154104-19; b) S. Grimme, S. Ehrlich, L. Goerigk, Effect of the damping function in dispersion corrected density functional theory, *J. Comput. Chem.*, 2011, **32**, 1456-1465.
- <sup>7</sup> F. Weigend, R. Ahlrichs, Balanced basis sets of split valence, triple zeta valence and quadruple zeta valence quality for H to Rn: Design and assessment of accuracy, *Phys. Chem. Chem. Phys.* 2005, **7**, 3297-3305.
